# Supplementary material for: Dirhodium(ii)-catalyzed regio- and stereoselective cycloisomerization towards 6,5,3-tricyclic skeletons containing vicinal all-carbon quaternary stereocenters
Source: Royal Society of Chemistry journal article supplement (doi:10.1039/d4qo00998c), 2024-01-01
Supplement: d4qo00998c1.pdf [file d4qo00998c1.pdf]

## Supporting Information

Dirhodium(II)-catalyzed regio- and stereoselective  
cycloisomerization towards 6,5,3-tricyclic skeletons containing  
vicinal all-carbon quaternary stereocenters

*Zurong Xu,<sup>a</sup> Jiajun Lu,<sup>a</sup> Huanfeng Jiang,<sup>a</sup> Rui Wu<sup>\*a</sup> & Shifa Zhu<sup>\*a,b</sup>*

<sup>a</sup>Key Laboratory of Functional Molecular Engineering of Guangdong Province, School of Chemistry and Chemical Engineering, South China University of Technology, Guangzhou 510640, China.

<sup>b</sup>School of Chemistry and Chemical Engineering, Zhejiang Sci-Tech University, Hangzhou 310018, China.

# Contents

|                                                          |    |
|----------------------------------------------------------|----|
| 1. General information.....                              | 3  |
| 2. Optimization of reaction conditions.....              | 3  |
| 3. General procedure for preparation of 1,6-enynes ..... | 5  |
| 4. General procedure for Rh-catalyzed reactions.....     | 33 |
| 5. Gram-scale reaction and synthetic applications .....  | 62 |
| 6. Rh-catalyzed preliminary experiments .....            | 71 |
| 7. General procedure for mechanism experiments:.....     | 72 |
| 8. The X-ray diffraction analysis .....                  | 79 |
| 9. References.....                                       | 82 |
| 10. The NMR spectrum .....                               | 83 |

## 1. General information

All reactions were carried out under an inert atmosphere of dry N<sub>2</sub> in Schlenk tube. Tetrahydrofuran and toluene were distilled from sodium and benzophenone prior to use. Dichloromethane and dichloroethane were distilled from CaH<sub>2</sub> prior to use. All other reagents and solvents were used as received from commercial sources, unless specified otherwise, or prepared. <sup>1</sup>H, <sup>13</sup>C, <sup>19</sup>F NMR spectra were recorded on Bruker AVANCE 400 MHz or 500 MHz, <sup>1</sup>H NMR and <sup>13</sup>C NMR chemical shifts were determined relative to internal standard TMS at δ 0.0 and <sup>19</sup>F NMR chemical shifts were determined relative to CFCl<sub>3</sub> as external standard. Chemical shifts (δ) are reported in ppm, and coupling constants (*J*) are in Hertz (Hz). The following abbreviations were used to explain the multiplicities: s = singlet, d = doublet, t = triplet, q = quartet, m = multiplet, br = broad.. Melting points were determined using a hot stage apparatus. HRMS (EI) and HRMS (ESI) were determined on Waters Micromass GCT Premier, Agilent Technologies 6224 TOF LC/MS, and APEX III 7.0 TESLA FTMS spectrometers, respectively. Specific rotation [*α*] was determined using a polarimeter ZhuoGuang GP30 with a 1.2 mL cell, long 10 cm, [*α*]<sub>D</sub><sup>T</sup> values, reported in mL g<sup>-1</sup> dm<sup>-1</sup>, are calculated on the average value of 3 consecutive readings. The chiral Rh<sub>2</sub>(II) catalysts were purchased from Strem Chemicals, Inc. Enantiomeric ratios were determined by HPLC, using a chiral OD-H, OJ-H, IC, NC, INA and INC column with hexane and *i*-PrOH as solvents.

## 2. Optimization of reaction conditions

Table S1<sup>a</sup>

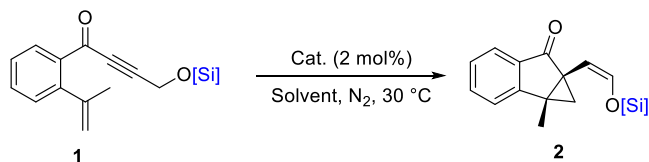

| Entry     | Cat.                                               | [Si] | <b>2</b>  | Solvent    | Yield <sup>b</sup>          | ee <sup>c</sup> | <i>Z</i> : <i>E</i> <sup>d</sup> |
|-----------|----------------------------------------------------|------|-----------|------------|-----------------------------|-----------------|----------------------------------|
| 1         | Rh <sub>2</sub> (OPiv) <sub>4</sub>                | TBS  | <b>2d</b> | DCE        | 57%                         | -               | >99:1                            |
| 2         | Rh <sub>2</sub> ( <i>S</i> -BTMCP) <sub>4</sub>    | TBS  | <b>2d</b> | DCE        | 49%                         | 35%             | >99:1                            |
| 3         | Rh <sub>2</sub> ( <i>S</i> -NTTL) <sub>4</sub>     | TBS  | <b>2d</b> | DCE        | 6%                          | 70%             | >99:1                            |
| 4         | Rh <sub>2</sub> ( <i>S</i> -DOSP) <sub>4</sub>     | TBS  | <b>2d</b> | DCE        | 45%                         | 23%             | >99:1                            |
| 5         | Rh <sub>2</sub> ( <i>S</i> -PTTL) <sub>4</sub>     | TBS  | <b>2d</b> | DCE        | 14%                         | 37%             | >99:1                            |
| 6         | Rh <sub>2</sub> ( <i>S</i> -PTPA) <sub>4</sub>     | TBS  | <b>2d</b> | DCE        | 60%                         | 2%              | >99:1                            |
| 7         | Rh <sub>2</sub> ( <i>R</i> -PTAD) <sub>4</sub>     | TBS  | <b>2d</b> | DCE        | 13%                         | 21%             | >99:1                            |
| 8         | Rh <sub>2</sub> ( <i>S</i> -TFPTTL) <sub>4</sub>   | TBS  | <b>2d</b> | DCE        | 66%                         | 40%             | >99:1                            |
| 9         | Rh <sub>2</sub> ( <i>S</i> -TCPTTL) <sub>4</sub>   | TBS  | <b>2d</b> | DCE        | 64%                         | 90%             | >99:1                            |
| <b>10</b> | <b>Rh<sub>2</sub>(<i>S</i>-TCPTTL)<sub>4</sub></b> | TBS  | <b>2d</b> | <b>DCM</b> | <b>84</b><br>% <sup>d</sup> | <b>93%</b>      | >99:1                            |

|                 |                                  |       |           |                 |     |     |       |
|-----------------|----------------------------------|-------|-----------|-----------------|-----|-----|-------|
| 11              | $\text{Rh}_2(\text{S-TCPTTL})_4$ | TBDPS | <b>2e</b> | DCM             | 18% | 74% | >99:1 |
| 12              | $\text{Rh}_2(\text{S-TCPTTL})_4$ | TIPS  | <b>2f</b> | DCM             | 52% | 83% | >99:1 |
| 13              | $\text{Rh}_2(\text{S-TCPTTL})_4$ | TBS   | <b>2d</b> | $\text{CHCl}_3$ | 64% | 89% | >99:1 |
| 14              | $\text{Rh}_2(\text{S-TCPTTL})_4$ | TBS   | <b>2d</b> | Toluene         | 60% | 75% | >99:1 |
| 15 <sup>g</sup> | $\text{Rh}_2(\text{S-TCPTTL})_4$ | TBS   | <b>2d</b> | DCM             | 57% | 92% | >99:1 |
| 16 <sup>h</sup> | $\text{Rh}_2(\text{S-TCPTTL})_4$ | TBS   | <b>2d</b> | DCM             | 73% | 93% | >99:1 |
| 17 <sup>i</sup> | $\text{Rh}_2(\text{S-TCPTTL})_4$ | TBS   | <b>2d</b> | DCM             | 33% | 90% | >99:1 |

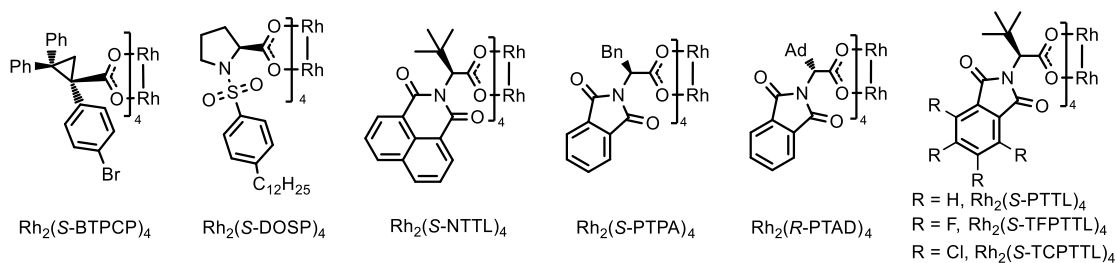

<sup>a</sup>Experiments were performed with **1** (0.05 mmol), catalyst (2 mol%) in solvent with stirring at the temperature for 48 h. (Cat. = catalyst; ee = enantiomeric excess, Ad = 1-admantyl). <sup>b</sup>NMR yield; <sup>c</sup>Determined by chiral HPLC; <sup>e</sup>DCM as solvent; <sup>g</sup>Raw DCM as solvent; <sup>h</sup>1 mol% catalyst; <sup>i</sup>0 °C. (TBS = *tert*-butyldimethylsilyl, TBDPS = *tert*-butyldiphenylsilyl, TIPS = triisopropylsilyl)

### 3. General procedure for preparation of 1,6-enynes

#### Typical procedure A<sup>[1]</sup>:

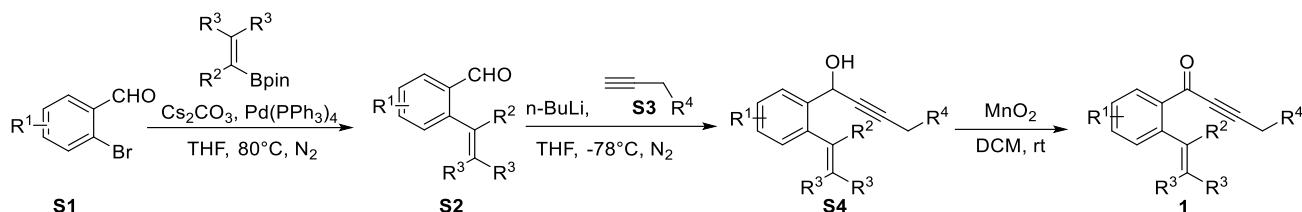

To an N<sub>2</sub>-sparged solution of **S1** (10 mmol, 1.0 equiv), alkenylboronic acid pinacol ester (11 mmol, 1.1 equiv) and cesium carbonate (30 mmol, 3.0 equiv) in THF (50 mL) was added Pd(PPh<sub>3</sub>)<sub>4</sub> (0.2 mmol, 2 mol%). The mixture was stirred at 80 °C for 12 h. After the reaction completed (monitored by GC-MS), it was diluted with water and extracted with EtOAc. The combined organics were washed with brine, dried over anhydrous Na<sub>2</sub>SO<sub>4</sub> and concentrated in vacuo. The resulting residue was flash chromatographed (PE: EA = 200:1) on silica gel to afford the product **S2**.

Under N<sub>2</sub> atmosphere, the solution of n-BuLi (6 mmol, 1.2 equiv) in hexane (1.6 mol/L) was added dropwise into the solution of **S3** (6 mmol, 1.2 equiv) in anhydrous THF at -78°C. After the 30 min, aldehyde **S2** (5 mmol, 1.0 equiv) dissolved in anhydrous THF was added and the temperature was allowed to raise to room temperature. After the complete consumption of **S3** (determined by TLC, about 1 h), the reaction was quenched by saturated NH<sub>4</sub>Cl (aq), and extracted with EtOAc. The organic phase was washed with brine and dried with anhydrous Na<sub>2</sub>SO<sub>4</sub>, the solvent was removed by rotary evaporator. The resulting residue was flash chromatography (PE: EA = 10:1) on silica gel to afford the product **S4**.

To the solution of **S4** (2 mmol, 1.0 equiv) in 10 mL DCM, activated MnO<sub>2</sub> (20 mmol, 10 equiv) was added and the mixture was stirred at room temperature for about 3 h. After the complete consumption of **S4** determined by TLC, the reaction mixture was filtered through silica gel and the filtrate was concentrated by rotary evaporator. The resulting residue was flash chromatographed (PE: EA = 20:1) on silica gel to afford the product **1**.

The substrates such as **1a**, **1c**, **1d**, **1e**, **1f**, **1g**, **1h**, **1i**, **1j**, **1k**, **1l**, **1m**, **1n**, **1o**, **1p**, **1q**, **1r**, **1s**, **1t**, **1u**, **1v**, **1w**, **1x**, **1y**, **3k**, **3n**, **3o**, **3p**, **3r** were synthesized according to General procedure A.

#### 1-(2-(prop-1-en-2-yl)phenyl)but-2-yn-1-one (**1a**)

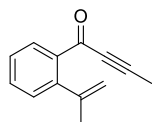

Yellow liquid, purified by chromatography (PE/EA = 20/1, R<sub>f</sub> = 0.5); <sup>1</sup>H NMR (400 MHz, Chloroform-*d*) δ 7.98 (dd, *J* = 7.7, 1.4 Hz, 1H), 7.47 (td, *J* = 7.5, 1.5 Hz, 1H), 7.36 (td, *J* = 7.6, 1.3 Hz, 1H), 7.24 (dd, *J* = 7.6, 1.3 Hz, 1H), 5.15 (q, *J* = 1.6 Hz, 1H), 4.86 (dd, *J* = 1.9, 1.0 Hz, 1H), 2.09 (d, *J* = 2.0 Hz, 6H). <sup>13</sup>C NMR (101 MHz, Chloroform-*d*) δ 179.8, 146.1, 145.0, 136.2, 132.3, 131.1, 129.6, 127.0, 115.0, 91.7, 80.6, 24.0, 4.3. HRMS (ESI) [M+Na]<sup>+</sup> calculated for C<sub>13</sub>H<sub>12</sub>O Na<sup>+</sup>: 207.0780, found 207.0779.

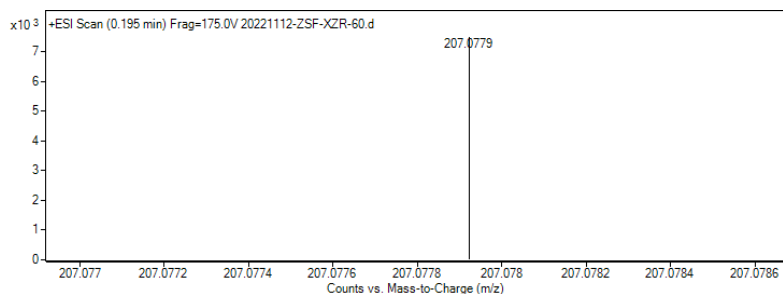

#### 4-methoxy-1-(2-(prop-1-en-2-yl)phenyl)but-2-yn-1-one (1c)

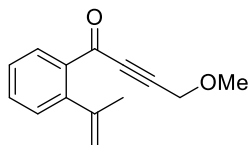

Colorless liquid, purified by chromatography (PE/EA = 20/1, R<sub>f</sub> = 0.5); <sup>1</sup>H NMR (500 MHz, Chloroform-*d*) δ 7.99 (dd, *J* = 7.8, 1.4 Hz, 1H), 7.50 (td, *J* = 7.5, 1.4 Hz, 1H), 7.38 (td, *J* = 7.6, 1.4 Hz, 1H), 7.3 (dd, *J* = 7.6, 1.3 Hz, 1H), 5.20 – 5.12 (m, 1H), 4.89 – 4.85 (m, 1H), 4.33 (s, 2H), 3.45 (s, 3H), 2.10 (s, 3H). <sup>13</sup>C NMR (126 MHz, Chloroform-*d*) δ 178.9, 145.8, 145.1, 135.6, 132.8, 131.3, 129.7, 127.2, 115.4, 89.0, 85.7, 59.8, 58.2, 23.9. HRMS (ESI) [M+Na]<sup>+</sup> calculated for C<sub>14</sub>H<sub>14</sub>O<sub>2</sub>Na<sup>+</sup>: 237.0886, found 237.0885.

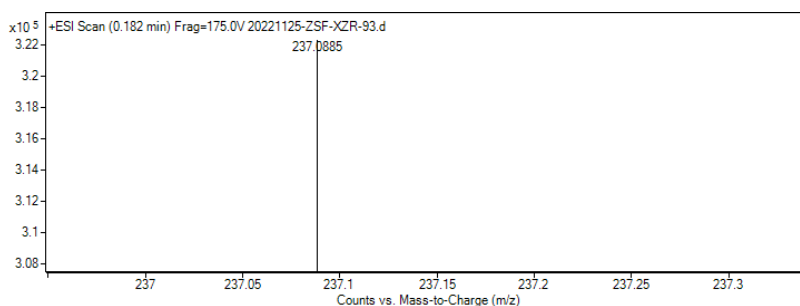

#### 4-((tert-butyldimethylsilyloxy)-1-(2-(prop-1-en-2-yl)phenyl)but-2-yn-1-one (1d)

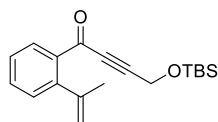

Yellow liquid, purified by chromatography (PE/EA = 20/1, R<sub>f</sub> = 0.5); <sup>1</sup>H NMR (400 MHz, Chloroform-*d*) δ 8.00 (dd, *J* = 7.8, 1.4 Hz, 1H), 7.49 (td, *J* = 7.5, 1.4 Hz, 1H), 7.37 (td, *J* = 7.6, 1.3 Hz, 1H), 7.26 (d, *J* = 1.1 Hz, 1H), 5.15 (p, *J* = 1.6 Hz, 1H), 4.86 (dt, *J* = 1.9, 0.9 Hz, 1H), 4.54 (s, 2H), 2.10 (dd, *J* = 1.5, 0.9 Hz, 3H), 0.92 (s, 9H), 0.14 (s, 6H). <sup>13</sup>C NMR (101 MHz, CDCl<sub>3</sub>) δ 179.1, 146.0, 145.1, 135.7, 132.6, 131.4, 129.7, 127.0, 115.2, 91.8, 84.2, 51.7, 25.7, 23.9, 18.3, -5.2. HRMS (ESI) [M+Na]<sup>+</sup> calculated for C<sub>19</sub>H<sub>26</sub>O<sub>2</sub>SiNa<sup>+</sup>: 337.1594, found 337.1598.

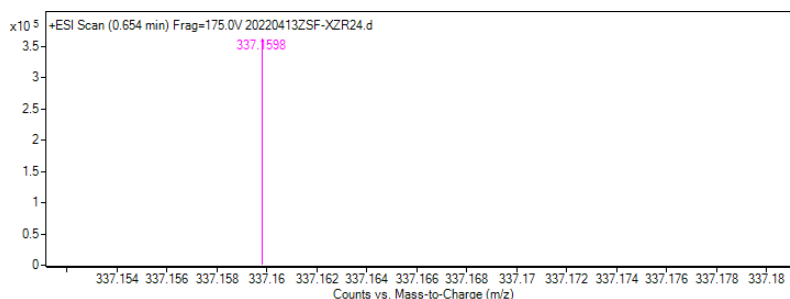

#### 4-((tert-butyl)diphenylsilyloxy)-1-(2-(prop-1-en-2-yl)phenyl)but-2-yn-1-one (1e)

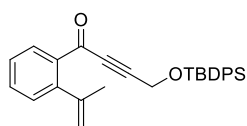

Yellow liquid, purified by chromatography (PE/EA = 20/1, Rf = 0.5);  $^1\text{H NMR}$  (400 MHz, Chloroform-*d*)  $\delta$  7.95 (dd,  $J$  = 7.8, 1.4 Hz, 1H), 7.75 (dt,  $J$  = 6.7, 1.6 Hz, 4H), 7.57 – 7.34 (m, 8H), 7.29 (dd,  $J$  = 7.4, 1.4 Hz, 1H), 5.18 (t,  $J$  = 1.6 Hz, 1H), 4.90 (s, 1H), 4.58 (s, 2H), 2.12 (t,  $J$  = 1.1 Hz, 3H), 1.12 (s, 9H).  $^{13}\text{C NMR}$  (101 MHz, Chloroform-*d*)  $\delta$  179.1, 146.0, 145.1, 135.8, 135.6, 132.6, 132.5, 131.4, 130.1, 129.7, 127.9, 127.1, 115.2, 91.5, 84.4, 52.7, 26.7, 24.0, 19.2. **HRMS** (ESI)  $[\text{M}+\text{Na}]^+$  calculated for  $\text{C}_{29}\text{H}_{30}\text{O}_2\text{SiNa}^+$ : 461.1907, found 461.1913.

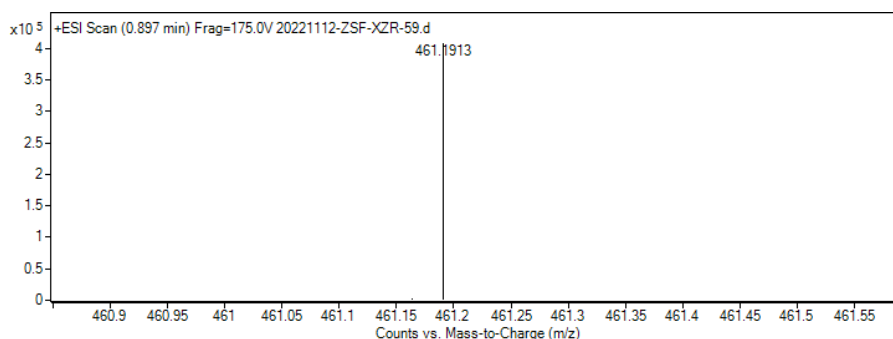

#### 1-(2-(prop-1-en-2-yl)phenyl)-4-((triisopropylsilyloxy)but-2-yn-1-one (1f)

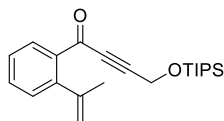

Yellow liquid, purified by chromatography (PE/EA = 20/1, Rf = 0.5);  $^1\text{H NMR}$  (400 MHz, Chloroform-*d*)  $\delta$  8.03 (dd,  $J$  = 7.7, 1.3 Hz, 1H), 7.51 (td,  $J$  = 7.5, 1.4 Hz, 1H), 7.38 (td,  $J$  = 7.6, 1.3 Hz, 1H), 7.27 (dd,  $J$  = 7.7 Hz, 1.4 Hz), 5.17 (t,  $J$  = 1.6 Hz, 1H), 4.88 (dd,  $J$  = 1.8, 1.0 Hz, 1H), 4.64 (s, 3H), 2.12 (t,  $J$  = 1.1 Hz, 4H), 1.12 (s, 18H), 1.11 (s, 3H).  $^{13}\text{C NMR}$  (101 MHz, Chloroform-*d*)  $\delta$  179.1, 145.9, 145.1, 135.8, 132.5, 131.4, 129.6, 127.0, 115.2, 91.9, 84.0, 52.1, 23.9, 17.9, 12.0. **HRMS** (ESI)  $[\text{M}+\text{Na}]^+$  calculated for  $\text{C}_{22}\text{H}_{32}\text{O}_2\text{SiNa}^+$ : 379.2063, found 379.2067.

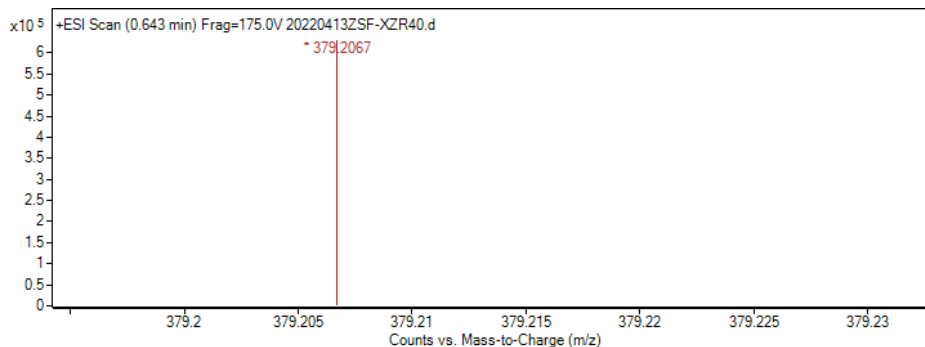

#### 4-((tert-butyl)dimethylsilyloxy)-1-(5-fluoro-2-(prop-1-en-2-yl)phenyl)but-2-yn-1-one (1g)

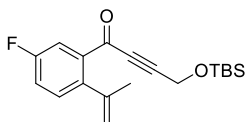

Yellow liquid, purified by chromatography (PE/EA = 20/1, Rf = 0.5);  $^1\text{H NMR}$  (500 MHz, Chloroform-*d*)  $\delta$  7.66 (dd,  $J$  = 9.1, 2.7 Hz, 1H), 7.23 (dd,  $J$  = 8.4, 5.5 Hz, 1H), 7.20 (dd,  $J$  = 7.9, 2.7 Hz, 1H), 2.07 (t,  $J$  = 1.2 Hz, 3H), 0.92 (s, 9H), 0.15 (s, 6H).  $^{13}\text{C NMR}$  (126 MHz, Chloroform-*d*)  $\delta$  177.7 (d,  $J$  = 2.3 Hz), 161.3 (d,  $J$  = 247.7 Hz), 144.8, 141.0 (d,  $J$  = 3.6 Hz), 137.2 (d,  $J$  = 6.3 Hz), 131.4 (d,  $J$  = 7.2 Hz), 119.5 (d,  $J$  = 21.1 Hz), 117.7 (d,  $J$  = 23.0 Hz), 115.9, 92.5, 83.7, 51.7, 25.7, 24.0, 18.3, -5.3.  $^{19}\text{F NMR}$  (471 MHz,  $\text{CDCl}_3$ )  $\delta$  -114.5. **HRMS** (ESI)  $[\text{M}+\text{Na}]^+$  calculated for  $\text{C}_{19}\text{H}_{25}\text{FO}_2\text{SiNa}^+$ : 355.1500, found 355.1501.

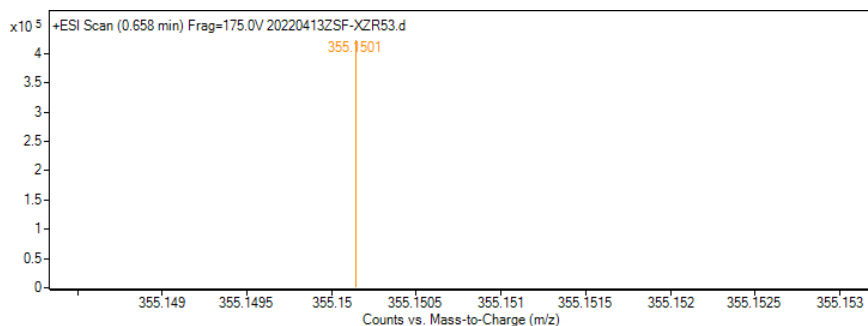

#### 4-((tert-butyldimethylsilyloxy)-1-(5-chloro-2-(prop-1-en-2-yl)phenyl)but-2-yn-1-one (1h)

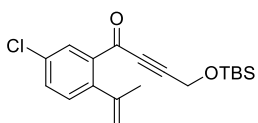

Yellow liquid, purified by chromatography (PE/EA = 20/1, R<sub>f</sub> = 0.5); <sup>1</sup>H NMR (400 MHz, Chloroform-*d*) δ 7.96 (d, *J* = 2.3 Hz, 1H), 7.47 (dd, *J* = 8.2, 2.2 Hz, 1H), 7.22 (d, *J* = 8.2 Hz, 1H), 5.39 – 5.08 (m, 1H), 4.87 (dd, *J* = 1.6, 0.9 Hz, 1H), 4.56 (s, 2H), 2.09 (t, *J* = 1.2 Hz, 3H), 0.95 (s, 9H), 0.17 (s, 6H). <sup>13</sup>C NMR (101 MHz, CDCl<sub>3</sub>) δ 177.7, 144.7, 143.4, 137.0, 133.0, 132.4, 131.1, 130.9, 115.9, 92.8, 83.7, 51.7, 25.7, 23.8, 18.2, -5.2. HRMS (ESI) [M+Na]<sup>+</sup> calculated for C<sub>19</sub>H<sub>25</sub>ClO<sub>2</sub>SiNa<sup>+</sup>: 371.1204, found 371.1210.

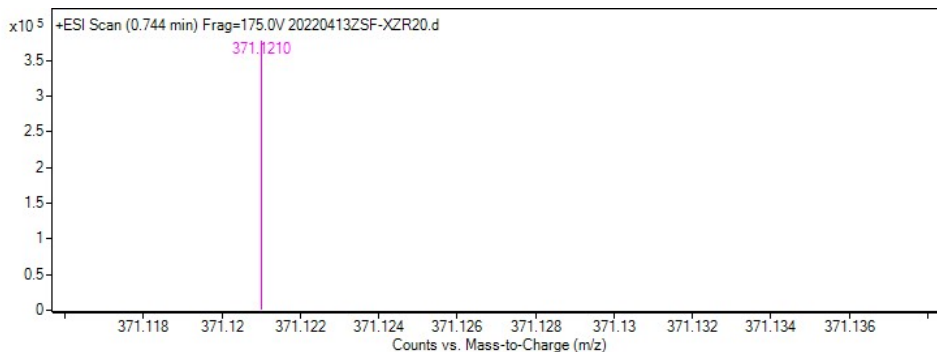

#### 4-((tert-butyldimethylsilyloxy)-1-(2-(prop-1-en-2-yl)-5-(trifluoromethyl)phenyl)but-2-yn-1-one (1i)

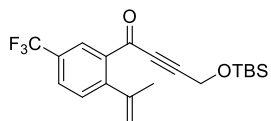

Yellow liquid, purified by chromatography (PE/EA = 20/1, R<sub>f</sub> = 0.5); <sup>1</sup>H NMR (500 MHz, Chloroform-*d*) δ 8.22 (d, *J* = 2.0 Hz, 1H), 7.94 – 7.69 (m, 1H), 7.40 (d, *J* = 8.0 Hz, 1H), 5.22 (t, *J* = 1.5 Hz, 1H), 4.90 (t, *J* = 1.2 Hz, 1H), 4.56 (s, 2H), 2.11 (t, *J* = 1.2 Hz, 3H), 0.92 (s, 9H), 0.15 (s, 6H). <sup>13</sup>C NMR (126 MHz, Chloroform) δ 177.7, 148.5, 144.6, 136.2, 130.4, 129.61 (q, *J* = 33.3 Hz), 128.9 (q, *J* = 3.6 Hz), 128.0 (q, *J* = 3.7 Hz), 124.2 (q, *J* = 272.16 Hz), 116.4, 93.2, 83.6, 51.7, 25.7, 23.7, 18.2, -5.3. <sup>19</sup>F NMR (471 MHz, CDCl<sub>3</sub>) δ -62.68. HRMS (ESI) [M+Na]<sup>+</sup> calculated for C<sub>20</sub>H<sub>25</sub>F<sub>3</sub>O<sub>2</sub>SiNa<sup>+</sup>: 405.1468, found 405.1471.

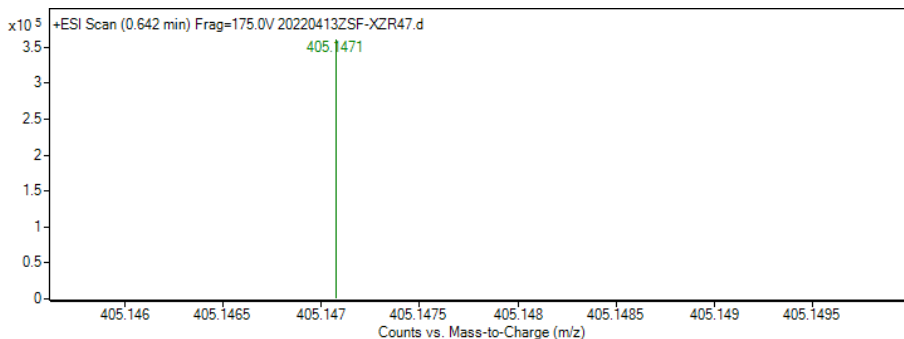



#### 4-((tert-butyldimethylsilyloxy)-1-(5-nitro-2-(prop-1-en-2-yl)phenyl)but-2-yn-1-one(1j)

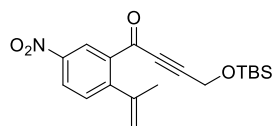

Orange liquid, purified by chromatography (PE/EA = 20/1, Rf = 0.5);  $^1\text{H NMR}$  (400 MHz, Chloroform-*d*)  $\delta$  8.81 (d,  $J$  = 2.4 Hz, 1H), 8.34 (dd,  $J$  = 8.4, 2.4 Hz, 1H), 7.47 (d,  $J$  = 8.4 Hz, 1H), 5.28 (p,  $J$  = 1.5 Hz, 1H), 5.08 – 4.90 (m, 1H), 4.59 (s, 2H), 2.14 (dd,  $J$  = 1.6, 0.9 Hz, 3H), 0.94 (s, 9H), 0.17 (s, 6H).  $^{13}\text{C NMR}$  (101 MHz,  $\text{CDCl}_3$ )  $\delta$  176.8, 151.1, 146.7, 144.0, 136.8, 131.0, 126.7, 125.9, 117.2, 94.0, 83.3, 51.7, 25.7, 23.5, 18.2, -5.3. **HRMS** (ESI)  $[\text{M}+\text{Na}]^+$  calculated for  $\text{C}_{19}\text{H}_{25}\text{NO}_4\text{SiNa}^+$ : 382.1445, found 382.1449.

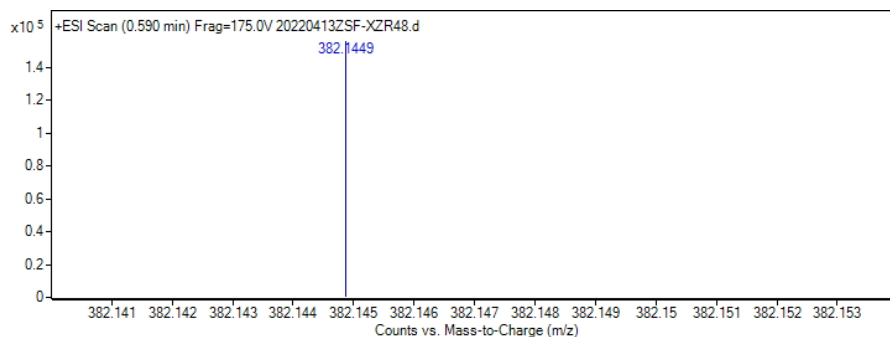

#### 4-((tert-butyldimethylsilyloxy)-1-(5-methyl-2-(prop-1-en-2-yl)phenyl)but-2-yn-1-one (1k)

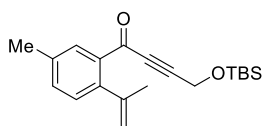

Yellow liquid, purified by chromatography (PE/EA = 20/1, Rf = 0.5);  $^1\text{H NMR}$  (500 MHz, Chloroform-*d*)  $\delta$  7.80 (d,  $J$  = 1.9 Hz, 1H), 7.30 (ddd,  $J$  = 7.7, 2.0, 0.9 Hz, 1H), 7.14 (d,  $J$  = 7.7 Hz, 1H), 5.12 (p,  $J$  = 1.6 Hz, 1H), 4.83 (dd,  $J$  = 1.9, 1.0 Hz, 1H), 4.54 (s, 2H), 2.39 (s, 3H), 2.07 (d,  $J$  = 1.3 Hz, 3H), 0.93 (s, 9H), 0.15 (s, 6H).  $^{13}\text{C NMR}$  (126 MHz,  $\text{CDCl}_3$ )  $\delta$  179.2, 145.9, 142.4, 136.9, 135.6, 133.3, 131.8, 129.6, 115.0, 91.7, 84.2, 51.8, 25.7, 24.0, 20.9, 18.3, -5.2. **HRMS** (ESI)  $[\text{M}+\text{Na}]^+$  calculated for  $\text{C}_{20}\text{H}_{28}\text{O}_2\text{SiNa}^+$ : 351.1751, found 351.1754.

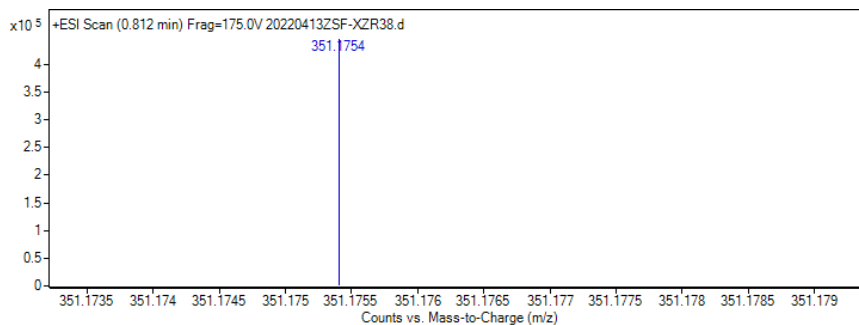

#### 4-((tert-butyldimethylsilyloxy)-1-(5-methoxy-2-(prop-1-en-2-yl)phenyl)but-2-yn-1-one (1l)

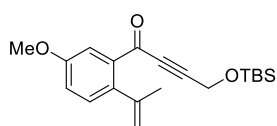

Yellow liquid, purified by chromatography (PE/EA = 10/1, Rf = 0.5);  $^1\text{H NMR}$  (400 MHz, Chloroform-*d*)  $\delta$  7.46 (d,  $J$  = 2.7 Hz, 1H), 7.18 (d,  $J$  = 8.4 Hz, 1H), 7.02 (dd,  $J$  = 8.4, 2.8 Hz, 1H), 5.13 (p,  $J$  = 1.5 Hz, 1H), 4.83 (dd,  $J$  = 1.8, 0.9 Hz, 1H), 4.52 (s, 2H), 3.85 (s, 3H), 2.68 – 1.76 (m, 3H), 0.91 (s, 9H), 0.14 (s, 6H).  $^{13}\text{C NMR}$  (101 MHz,  $\text{CDCl}_3$ )  $\delta$  179.1, 158.4, 145.2, 137.5, 136.9, 130.7, 118.5, 115.6, 91.9, 84.1, 77.3, 77.1, 76.7, 55.5, 51.7, 25.7, 24.1, 18.2, -5.2. **HRMS** (ESI)  $[\text{M}+\text{Na}]^+$  calculated for  $\text{C}_{20}\text{H}_{28}\text{O}_3\text{SiNa}^+$ : 367.1700, found 367.1702.

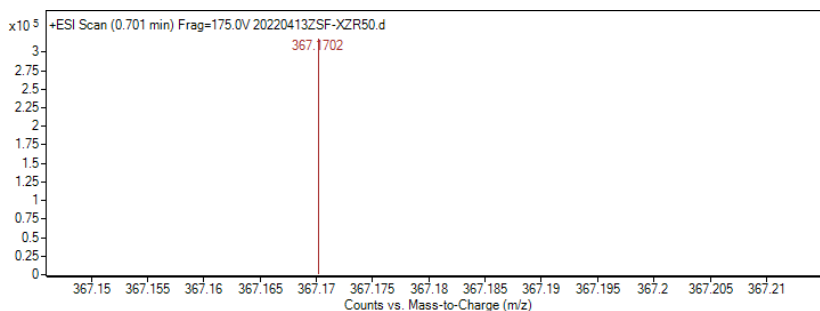

#### 4-((tert-butyldimethylsilyloxy)-1-(2-fluoro-6-(prop-1-en-2-yl)phenyl)but-2-yn-1-one (1m)

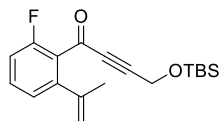

Yellow liquid, purified by chromatography (PE/EA = 20/1, R<sub>f</sub> = 0.5); <sup>1</sup>H NMR (500 MHz, Chloroform-*d*) δ 7.39 (td, *J* = 8.0, 5.5 Hz, 1H), 7.09 (dd, *J* = 7.7, 1.0 Hz, 1H), 7.04 (ddd, *J* = 9.5, 8.3, 1.0 Hz, 1H), 5.48 – 5.12 (m, 1H), 4.97 (t, *J* = 1.2 Hz, 1H), 4.51 (s, 2H), 2.14 (t, *J* = 1.3 Hz, 3H), 0.90 (s, 9H), 0.12 (s, 6H). <sup>13</sup>C NMR (126 MHz, Chloroform-*d*) δ 177.1, 159.5 (d, *J* = 253.1 Hz), 144.8 (d, *J* = 1.9 Hz), 142.8 (d, *J* = 2.1 Hz), 131.7 (d, *J* = 9.1 Hz), 126.9 (d, *J* = 13.8 Hz), 123.9 (d, *J* = 3.3 Hz), 118.3, 114.7 (d, *J* = 21.5 Hz), 92.6 (d, *J* = 1.4 Hz), 85.1, 51.7, 25.7, 24.0, 18.2, -5.3. <sup>19</sup>F NMR (471 MHz, CDCl<sub>3</sub>) δ -115.33. HRMS (ESI) [M+Na]<sup>+</sup> calculated for C<sub>19</sub>H<sub>25</sub>FO<sub>2</sub>SiNa<sup>+</sup>: 355.1500, found 355.1503.

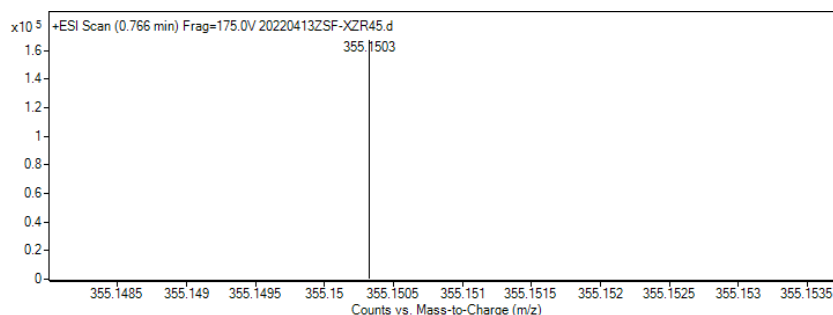

#### 4-((tert-butyldimethylsilyloxy)-1-(4-methyl-2-(prop-1-en-2-yl)phenyl)but-2-yn-1-one(1n)

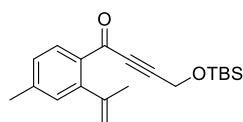

Yellow liquid, purified by chromatography (PE/EA = 10/1, R<sub>f</sub> = 0.5); <sup>1</sup>H NMR (400 MHz, Chloroform-*d*) δ 7.98 (d, *J* = 7.9 Hz, 1H), 7.19 (ddd, *J* = 7.9, 1.8, 0.8 Hz, 1H), 7.07 (d, *J* = 1.8 Hz, 1H), 5.14 (t, *J* = 1.6 Hz, 1H), 4.86 (dd, *J* = 1.9, 1.0 Hz, 1H), 4.56 (s, 2H), 2.42 (s, 3H), 2.09 (t, *J* = 1.1 Hz, 3H), 0.95 (s, 9H), 0.17 (s, 6H). <sup>13</sup>C NMR (101 MHz, CDCl<sub>3</sub>) δ 178.3, 146.5, 145.5, 143.7, 132.9, 132.2, 130.6, 127.7, 114.4, 91.3, 84.2, 51.7, 25.7, 23.9, 21.6, 18.3, -5.2. HRMS (ESI) [M+Na]<sup>+</sup> calculated for C<sub>20</sub>H<sub>28</sub>O<sub>2</sub>SiNa<sup>+</sup>: 351.1751, found 351.1758.

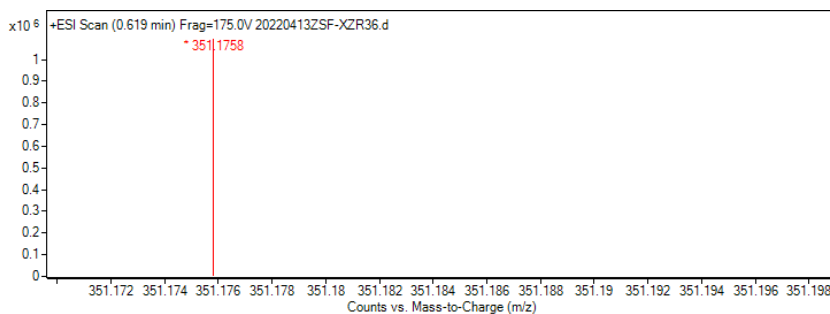

#### 4-((tert-butyldimethylsilyloxy)-1-(4-fluoro-2-(prop-1-en-2-yl)phenyl)but-2-yn-1-one (1o)

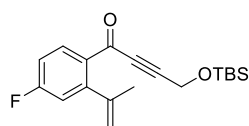

Yellow liquid, purified by chromatography (PE/EA = 20/1, R<sub>f</sub> = 0.5); <sup>1</sup>H NMR (500 MHz, Chloroform-*d*) δ 8.07 (dd, *J* = 8.7, 5.8 Hz, 1H), 7.05 (ddd, *J* = 8.7, 7.9, 2.6 Hz, 1H), 6.95 (dd, *J* = 9.3, 2.6 Hz, 1H), 5.16 (p, *J* = 1.6 Hz, 1H), 4.93 – 4.82 (m, 1H), 4.54 (s, 2H), 2.08 (t, *J* = 1.2 Hz, 3H), 0.93 (s, 9H), 0.15 (s, 6H). <sup>13</sup>C NMR (126 MHz, Chloroform-*d*) δ 177.2, 164.9 (d, *J* = 256.3 Hz), 148.5 (d, *J* = 8.9 Hz), 145.8 – 142.9 (m), 134.5 (d, *J* = 9.8 Hz), 131.9 (d, *J* = 2.8 Hz), 117.0 (d, *J* = 21.7 Hz), 115.5, 114.0 (d, *J* = 21.6 Hz), 92.0, 83.8, 51.7, 25.7, 23.6, 18.3, -5.2. <sup>19</sup>F NMR (471 MHz, CDCl<sub>3</sub>) δ -105.23. HRMS (ESI) [M+Na]<sup>+</sup> calculated for C<sub>19</sub>H<sub>25</sub>FO<sub>2</sub>SiNa<sup>+</sup>: 355.1500, found 355.1506.

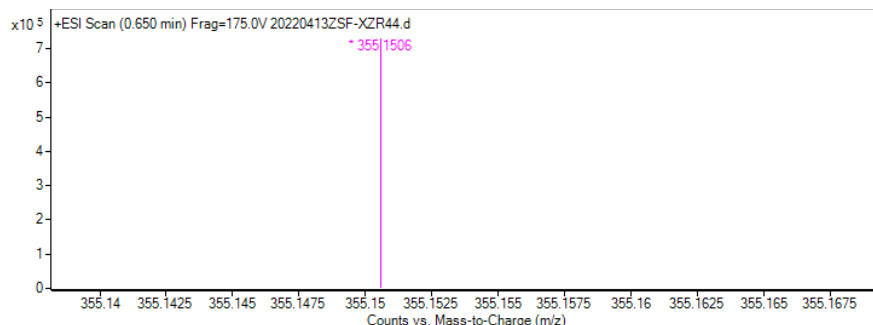

#### 4-((tert-butyldimethylsilyloxy)-1-(4-chloro-2-(prop-1-en-2-yl)phenyl)but-2-yn-1-one (1p)

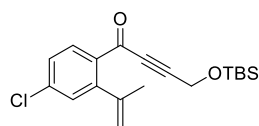

Yellow liquid, purified by chromatography (PE/EA = 10/1, R<sub>f</sub> = 0.5); <sup>1</sup>H NMR (500 MHz, Chloroform-*d*) δ 7.96 (d, *J* = 8.4 Hz, 1H), 7.34 (dd, *J* = 8.4, 2.1 Hz, 1H), 7.25 (d, *J* = 2.1 Hz, 1H), 5.17 (t, *J* = 1.5 Hz, 1H), 4.95 – 4.79 (m, 1H), 4.54 (s, 2H), 2.07 (t, *J* = 1.1 Hz, 3H), 0.92 (s, 9H), 0.14 (s, 6H). <sup>13</sup>C NMR (126 MHz, CDCl<sub>3</sub>) δ 177.6, 146.9, 144.8, 138.9, 133.9, 133.0, 129.9, 127.2, 115.8, 92.3, 83.8, 51.7, 25.7, 23.7, 18.3, -5.2. HRMS (ESI) [M+Na]<sup>+</sup> calculated for C<sub>19</sub>H<sub>25</sub>ClO<sub>2</sub>SiNa<sup>+</sup>: 371.1204, found 371.1210.

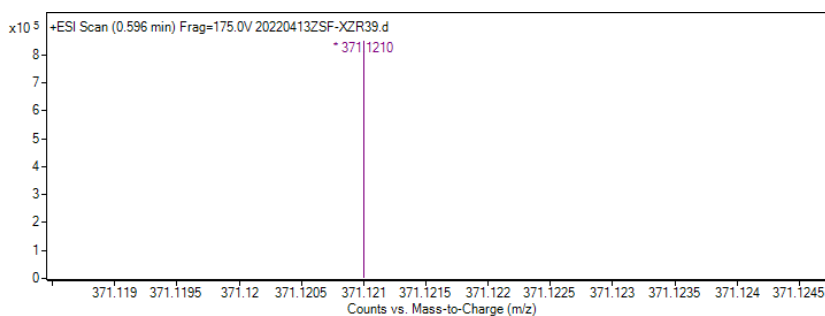

#### 4-((tert-butyldimethylsilyloxy)-1-(3-fluoro-2-(prop-1-en-2-yl)phenyl)but-2-yn-1-one (1q)

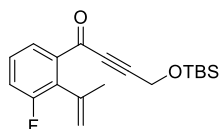

Yellow liquid, purified by chromatography (PE/EA = 20/1, R<sub>f</sub> = 0.5); <sup>1</sup>H NMR (500 MHz, Chloroform-*d*) δ 7.74 (dd, *J* = 7.8, 1.2 Hz, 1H), 7.34 (td, *J* = 8.0, 5.2 Hz, 1H), 7.27 – 7.21 (m, 1H), 5.28 (p, *J* = 1.6 Hz, 1H), 4.86 (t, *J* = 1.2 Hz, 1H), 4.53 (s, 2H), 2.15 (t, *J* = 1.2 Hz, 3H), 0.92 (s, 9H), 0.14 (s, 6H). <sup>13</sup>C NMR (126 MHz, Chloroform-*d*) δ 178.0 (d, *J* = 3.3 Hz), 159.6 (d, *J* = 246.4 Hz), 138.8, 138.4 (d, *J* = 3.7 Hz), 131.8 (d, *J* = 18.4 Hz), 128.2 (d, *J* = 8.6 Hz), 126.4 (d, *J* = 3.2 Hz), 119.8 (d, *J* = 23.7 Hz), 117.6 (d, *J* = 1.0 Hz), 92.4, 84.1, 51.7, 25.7, 23.6 (d, *J* = 2.0 Hz), 18.2, -5.6. <sup>19</sup>F NMR (471 MHz, CDCl<sub>3</sub>) δ -115.08. HRMS (ESI) [M+Na]<sup>+</sup> calculated for C<sub>19</sub>H<sub>25</sub>FO<sub>2</sub>SiNa<sup>+</sup>: 355.1500, found 355.1507.

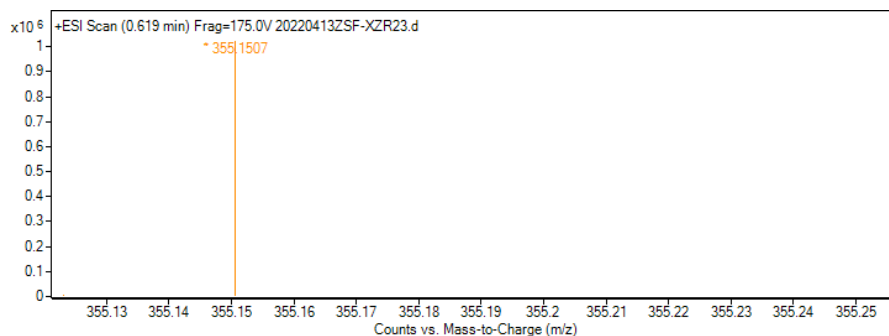

#### 4-((tert-butyldimethylsilyloxy)-1-(3-chloro-2-(prop-1-en-2-yl)phenyl)but-2-yn-1-one (1r)

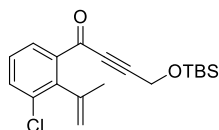

Yellow liquid, purified by chromatography (PE/EA = 20/1, R<sub>f</sub> = 0.5); <sup>1</sup>H NMR (500 MHz, Chloroform-*d*) δ 7.86 (dd, *J* = 7.8, 1.2 Hz, 1H), 7.55 (dd, *J* = 8.0, 1.3 Hz, 1H), 7.31 (t, *J* = 7.9 Hz, 1H), 5.26 (p, *J* = 1.5 Hz, 1H), 4.79 (t, *J* = 1.3 Hz, 1H), 4.54 (s, 2H), 2.17 (t, *J* = 1.3 Hz, 3H), 0.92 (s, 9H), 0.14 (s, 6H). <sup>13</sup>C NMR (126 MHz, CDCl<sub>3</sub>) δ 178.1, 142.6, 142.4, 138.4, 134.0, 133.5, 129.2, 127.8, 116.8, 92.6, 84.0, 77.3, 77.0, 76.8, 51.7, 25.7, 23.2, 18.2, -5.2. HRMS (ESI) [M+Na]<sup>+</sup> calculated for C<sub>19</sub>H<sub>25</sub>ClO<sub>2</sub>SiNa<sup>+</sup>: 371.1204, found 371.1213.

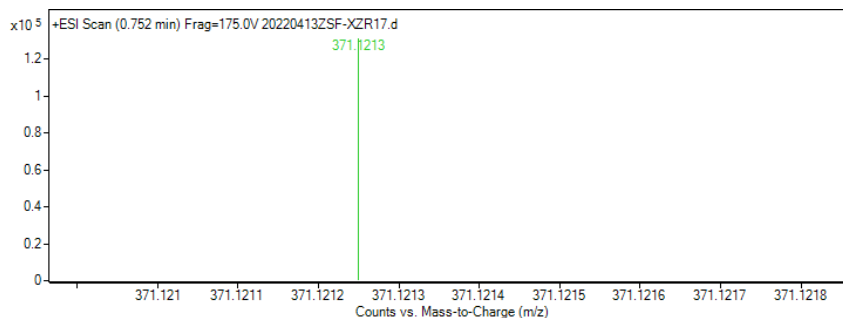

#### Methyl 3-(4-((tert-butyldimethylsilyloxy)but-2-ynoyl)-4-(prop-1-en-2-yl)benzoate (1s)

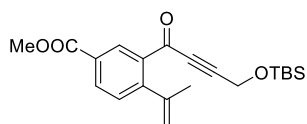

Yellow liquid, purified by chromatography (PE/EA = 10/1, R<sub>f</sub> = 0.5); <sup>1</sup>H NMR (500 MHz, Chloroform-*d*) δ 8.61 (d, *J* = 1.8 Hz, 1H), 8.15 (dd, *J* = 7.9, 1.8 Hz, 1H), 7.35 (d, *J* = 8.0 Hz, 1H), 5.21 (q, *J* = 1.5 Hz, 1H), 4.91 (t, *J* = 1.2 Hz, 1H), 4.57 (s, 2H), 3.96 (s, 3H), 2.11 (t, *J* = 1.2 Hz, 3H), 0.93 (s, 10H), 0.16 (s, 6H). <sup>13</sup>C NMR (126 MHz, CDCl<sub>3</sub>) δ 178.3, 166.0, 149.4, 145.0, 136.0, 133.3, 132.2, 130.0, 129.2, 116.1, 92.7, 83.8, 52.4, 51.7, 25.7, 23.7, 18.2, -5.2. HRMS (ESI) [M+Na]<sup>+</sup> calculated for C<sub>21</sub>H<sub>28</sub>O<sub>4</sub>SiNa<sup>+</sup>: 395.1649, found 395.1654.

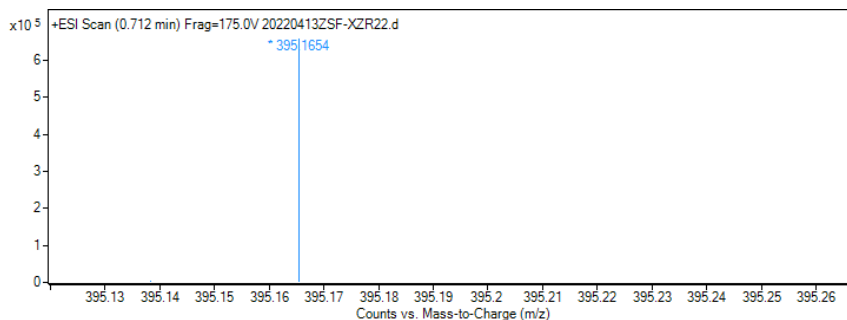

### 3-(4-((tert-butyldimethylsilyloxy)but-2-ynoyl)-2-(prop-1-en-2-yl)benzaldehyd (1t)

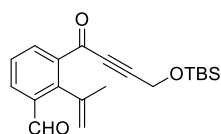

Yellow solid, M.P. = 102-103 °C, purified by chromatography (PE/EA = 20/1, R<sub>f</sub> = 0.5); <sup>1</sup>H NMR (400 MHz, Chloroform-*d*) δ 10.27 (d, *J* = 0.8 Hz, 1H), 8.33 (dd, *J* = 7.7, 1.4 Hz, 1H), 8.14 (dd, *J* = 7.8, 1.5 Hz, 1H), 7.55 (td, *J* = 7.8, 0.9 Hz, 1H), 5.50 – 5.40 (m, 1H), 4.94 (t, *J* = 1.3 Hz, 1H), 4.58 (s, 2H), 2.22 (t, *J* = 1.2 Hz, 3H), 0.95 (s, 9H), 0.17 (s, 6H). <sup>13</sup>C NMR (101 MHz, CDCl<sub>3</sub>) δ 191.6, 177.5, 147.6, 140.9, 136.9, 136.3, 134.1, 131.8, 127.5, 118.4, 92.8, 83.9, 51.7, 26.1, 25.7, 18.3, -5.2. HRMS (ESI) [M+Na]<sup>+</sup> calculated for C<sub>20</sub>H<sub>26</sub>O<sub>3</sub>SiNa<sup>+</sup>: 365.1543, found 365.1543.

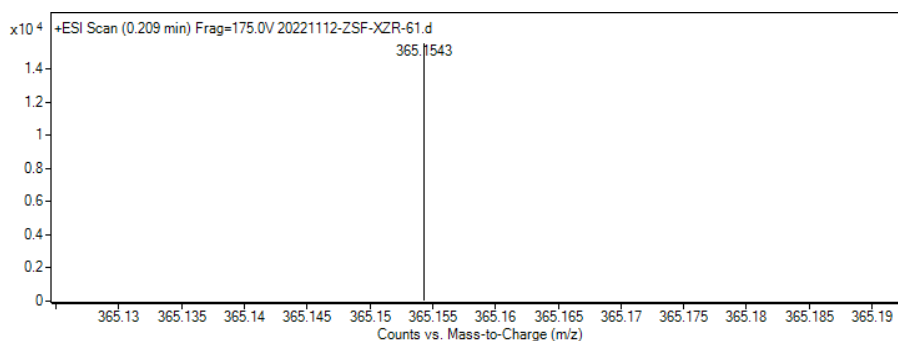

### 3-(4-((tert-butyldimethylsilyloxy)but-2-ynoyl)-4-(prop-1-en-2-yl)benzotrile (1u)

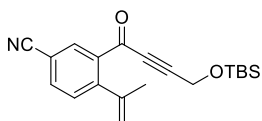

Yellow liquid, purified by chromatography (PE/EA = 10/1, R<sub>f</sub> = 0.5); <sup>1</sup>H NMR (400 MHz, Chloroform-*d*) δ 8.25 (d, *J* = 1.8 Hz, 1H), 7.77 (dd, *J* = 7.9, 1.8 Hz, 1H), 7.40 (d, *J* = 7.9 Hz, 1H), 5.25 (q, *J* = 1.5 Hz, 1H), 4.92 (d, *J* = 1.5 Hz, 1H), 4.57 (s, 2H), 2.11 (dd, *J* = 1.5, 0.9 Hz, 3H), 0.94 (s, 9H), 0.16 (s, 6H). <sup>13</sup>C NMR (101 MHz, CDCl<sub>3</sub>) δ 176.9, 149.3, 144.2, 136.7, 135.2, 134.6, 130.7, 117.7, 117.0, 111.4, 93.7, 83.4, 51.7, 25.7, 23.5, 18.2, -5.2. HRMS (ESI) [M+Na]<sup>+</sup> calculated for C<sub>20</sub>H<sub>25</sub>NO<sub>2</sub>SiNa<sup>+</sup>: 362.1547, found 362.1550.

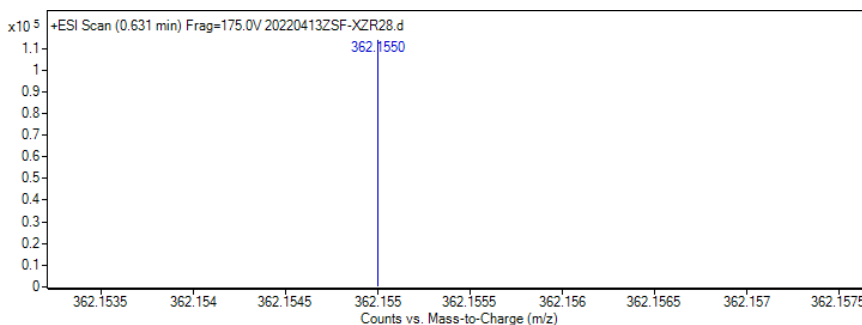

### 4-((tert-butyldimethylsilyloxy)-1-(5-fluoro-4-methyl-2-(prop-1-en-2-yl)phenyl)but-2-yn-1-one (1v)

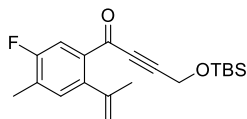

Yellow liquid, purified by chromatography (PE/EA = 20/1, R<sub>f</sub> = 0.5); <sup>1</sup>H NMR (400 MHz, Chloroform-*d*) δ 7.70 (d, *J* = 10.0 Hz, 1H), 7.08 (d, *J* = 7.4 Hz, 1H), 5.14 (t, *J* = 1.6 Hz, 1H), 4.84 (dd, *J* = 1.8, 1.0 Hz, 1H), 4.56 (s, 2H), 2.34 (d, *J* = 2.0 Hz, 3H), 2.07 (t, *J* = 1.2 Hz, 3H), 0.95 (s, 9H), 0.17 (s, 6H). <sup>13</sup>C NMR (101 MHz, Chloroform-*d*) δ 177.1 (d, *J* = 2.0 Hz), 159.8 (d, *J* = 246.2 Hz), 145.3, 141.1 (d, *J* = 3.8 Hz), 134.4 (d, *J* = 6.3 Hz), 133.0 (d, *J* = 4.6 Hz), 130.4 (d, *J* = 17.1 Hz), 117.9 (d, *J* = 24.0 Hz), 115.1, 91.9, 83.7, 51.7, 25.7, 24.0, 18.2, 14.7 (d, *J* = 3.1 Hz), -5.2. <sup>19</sup>F NMR (471 MHz, CDCl<sub>3</sub>) δ -118.98. HRMS (ESI) [M+Na]<sup>+</sup> calculated for C<sub>20</sub>H<sub>27</sub>FO<sub>2</sub>SiNa<sup>+</sup>: 369.1656, found 369.1663.

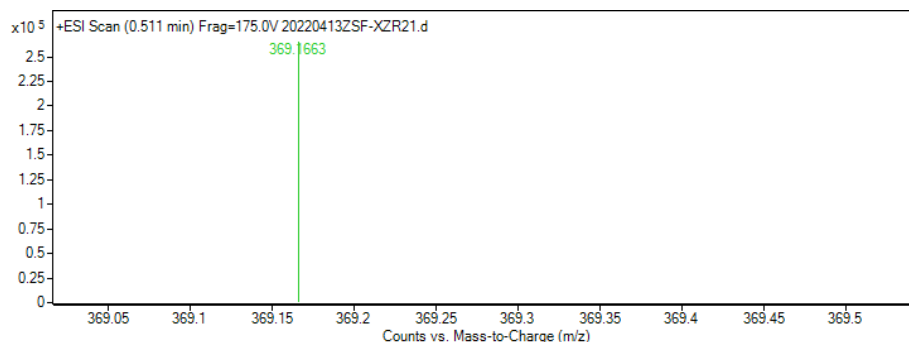

**4-((tert-butyldimethylsilyloxy)-1-(4,5-difluoro-2-(prop-1-en-2-yl)phenyl)but-2-yn-1-one (1w)**

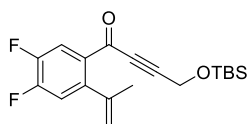

Yellow liquid, purified by chromatography (PE/EA = 10/1, R<sub>f</sub> = 0.5); <sup>1</sup>H NMR (500 MHz, Chloroform-*d*) δ 7.85 (dd, *J* = 10.7, 8.0 Hz, 1H), 7.06 (dd, *J* = 10.6, 7.5 Hz, 1H), 5.17 (p, *J* = 1.5 Hz, 1H), 4.87 (t, *J* = 1.2 Hz, 1H), 4.54 (s, 2H), 2.06 (t, *J* = 1.2 Hz, 3H), 0.93 (s, 9H), 0.15 (s, 6H). <sup>13</sup>C NMR (126 MHz, Chloroform-*d*) δ 176.1 (d, *J* = 1.6 Hz), 152.5 (dd, *J* = 258.0, 12.7 Hz), 148.7 (dd, *J* = 250.4, 12.9 Hz), 144.1, 143.0 (dd, *J* = 7.0, 3.9 Hz), 132.0 (t, *J* = 3.7 Hz), 120.6 (dd, *J* = 18.5, 2.1 Hz), 118.9 (d, *J* = 17.5 Hz), 116.3, 92.7, 83.4, 51.7, 25.7, 23.7, 18.2, -5.3. <sup>19</sup>F NMR (471 MHz, Chloroform-*d*) δ -130.01 (d, *J* = 21.3 Hz), -138.56 (d, *J* = 21.6 Hz). HRMS (ESI) [M+Na]<sup>+</sup> calculated for C<sub>19</sub>H<sub>24</sub>F<sub>2</sub>O<sub>2</sub>SiNa<sup>+</sup>: 373.1406, found 373.1410.

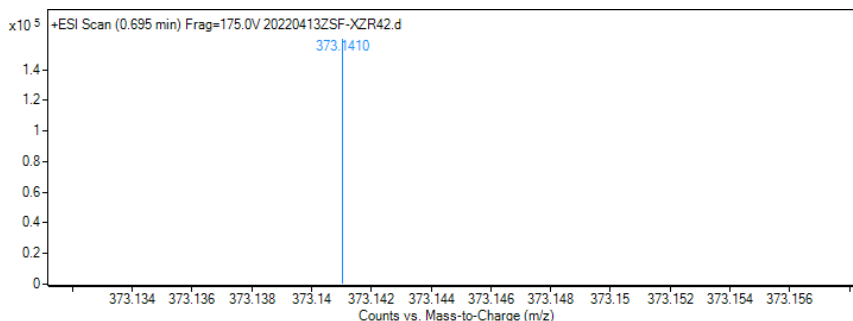

**4-((tert-butyldimethylsilyloxy)-1-(6-(prop-1-en-2-yl)benzo[d][1,3]dioxol-5-yl)but-2-yn-1-one (1x)**

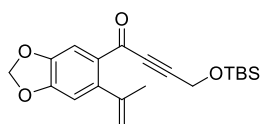

Yellow solid, M.P. = 69-70 °C, purified by chromatography (PE/EA = 20/1, R<sub>f</sub> = 0.5); <sup>1</sup>H NMR (400 MHz, Chloroform-*d*) δ 7.51 (s, 1H), 6.69 (s, 1H), 6.05 (s, 2H), 5.11 (t, *J* = 1.6 Hz, 1H), 4.82 (dd, *J* = 1.9, 0.9 Hz, 1H), 4.52 (s, 2H), 2.06 (dd, *J* = 1.4, 0.8 Hz, 3H), 0.92 (s, 9H), 0.15 (s, 6H). <sup>13</sup>C NMR (101 MHz, CDCl<sub>3</sub>) δ 176.8, 151.2, 146.6, 146.0, 142.5, 129.5, 115.1, 111.1, 109.9, 102.1, 91.1, 84.0, 51.7, 25.7, 24.0, 18.3, -5.2. HRMS (ESI) [M+Na]<sup>+</sup> calculated for C<sub>20</sub>H<sub>26</sub>O<sub>4</sub>SiNa<sup>+</sup>: 381.1492, found 381.1498.

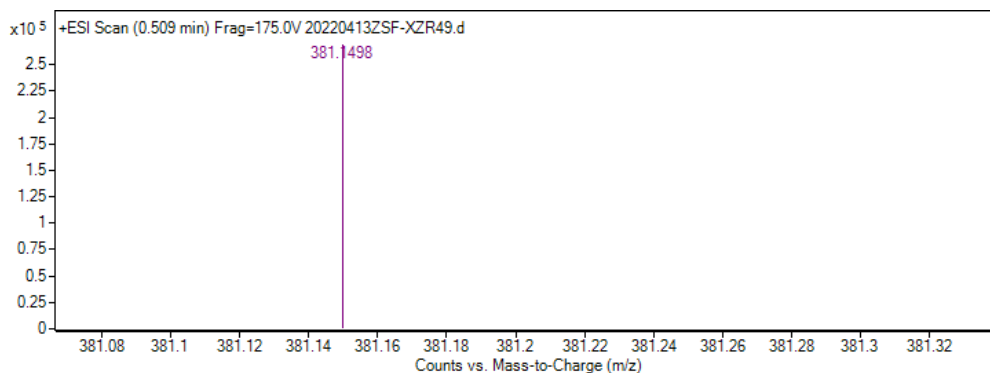

#### 4-((tert-butyldimethylsilyloxy)-1-(1-(prop-1-en-2-yl)naphthalen-2-yl)but-2-yn-1-one (1y)

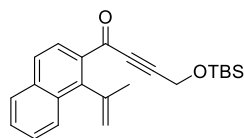

Yellow liquid, purified by chromatography (PE/EA = 10/1, Rf = 0.5);  $^1\text{H NMR}$  (500 MHz, Chloroform-*d*)  $\delta$  8.14 (dd,  $J = 8.6, 1.3$  Hz, 1H), 8.08 (d,  $J = 8.6$  Hz, 1H), 7.86 (dd,  $J = 7.9, 1.6$  Hz, 1H), 7.83 (d,  $J = 8.7$  Hz, 1H), 7.56 (dddd,  $J = 19.6, 8.2, 6.8, 1.4$  Hz, 2H), 5.47 (p,  $J = 1.5$  Hz, 1H), 4.92 (dd,  $J = 1.8, 1.0$  Hz, 1H), 4.57 (s, 2H), 2.27 (t,  $J = 1.2$  Hz, 3H), 0.93 (s, 9H), 0.16 (d,  $J = 3.2$  Hz, 6H).  $^{13}\text{C NMR}$  (126 MHz,  $\text{CDCl}_3$ )  $\delta$  179.0, 116.7, 92.4, 84.8, 51.8, 25.8, 25.2, 18.3, -5.2. **HRMS** (ESI)  $[\text{M}+\text{Na}]^+$  calculated for  $\text{C}_{23}\text{H}_{28}\text{O}_2\text{SiNa}^+$ : 387.1751, found 387.1755.

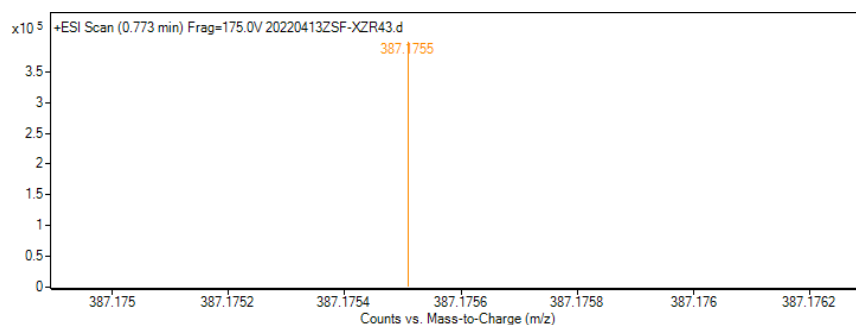

#### 4-((tert-butyldimethylsilyloxy)-1-(2-(1-phenylvinyl)phenyl)but-2-yn-1-one (3k)

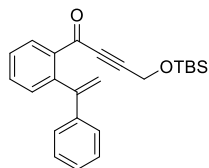

Yellow liquid, purified by chromatography (PE/EA = 20/1, Rf = 0.5);  $^1\text{H NMR}$  (500 MHz, Chloroform-*d*)  $\delta$  8.08 (dd,  $J = 7.7, 1.4$  Hz, 1H), 7.59 (td,  $J = 7.5, 1.4$  Hz, 1H), 7.50 (td,  $J = 7.6, 1.4$  Hz, 1H), 7.38 (dd,  $J = 7.5, 1.3$  Hz, 1H), 7.33 – 7.26 (m, 5H), 5.77 (d,  $J = 1.1$  Hz, 1H), 5.26 (d,  $J = 0.9$  Hz, 1H), 4.37 (s, 2H), 0.93 (s, 9H), 0.12 (s, 6H).  $^{13}\text{C NMR}$  (126 MHz, Chloroform-*d*)  $\delta$  178.5, 149.0, 142.8, 140.6, 137.0, 132.6, 131.7, 131.3, 128.2, 127.8, 127.7, 126.9, 115.5, 92.1, 84.0, 51.6, 25.8, 18.3, -5.2. **HRMS** (ESI)  $[\text{M}+\text{Na}]^+$  calculated for  $\text{C}_{24}\text{H}_{28}\text{O}_2\text{SiNa}^+$ : 399.1751, found 399.1742.

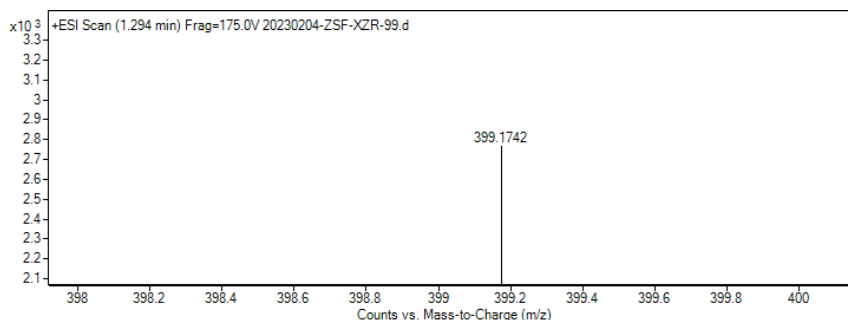

#### 4-((tert-butyldimethylsilyloxy)-1-(2-vinylphenyl)but-2-yn-1-one (3n)

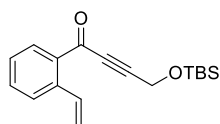

Yellow liquid, purified by chromatography (PE/EA = 20/1, Rf = 0.5);  $^1\text{H NMR}$  (500 MHz, Chloroform-*d*)  $\delta$  8.19 (dd,  $J = 7.9, 1.4$  Hz, 1H), 7.58 (dd,  $J = 7.8, 1.4$  Hz, 1H), 7.55 – 7.47 (m, 2H), 7.39 (td,  $J = 7.5, 1.4$  Hz, 1H), 5.66 (dd,  $J = 17.4, 1.3$  Hz, 1H), 5.38 (dd,  $J = 11.0, 1.3$  Hz, 1H), 4.57 (s, 2H), 0.94 (s, 9H), 0.16 (s, 6H).  $^{13}\text{C NMR}$  (126 MHz,  $\text{CDCl}_3$ )  $\delta$  179.0, 139.8, 135.9, 134.2, 133.2, 132.9, 127.8, 127.4, 117.2, 92.2, 84.1, 51.8, 25.7, 18.3, -5.2. **HRMS** (ESI)  $[\text{M}+\text{Na}]^+$  calculated for  $\text{C}_{18}\text{H}_{24}\text{O}_2\text{SiNa}^+$ : 323.1438, found 323.1446.

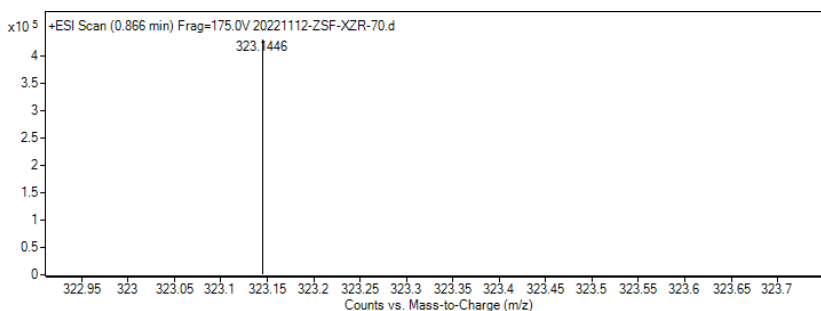

#### 4-((tert-butyl dimethylsilyloxy)-1-(2-(2-methylprop-1-en-1-yl)phenyl)but-2-yn-1-one(3o)

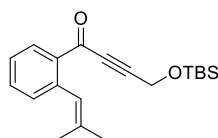

Yellow liquid, purified by chromatography (PE/EA = 20/1, R<sub>f</sub> = 0.5); <sup>1</sup>H NMR (400 MHz, Chloroform-*d*) δ 8.07 (d, *J* = 2.0 Hz, 1H), 7.60 (dd, *J* = 8.0, 2.0 Hz, 1H), 7.33 – 7.22 (m, 2H), 5.45 (t, *J* = 1.1 Hz, 1H), 5.18 (q, *J* = 1.6 Hz, 2H), 4.89 (dd, *J* = 1.8, 1.0 Hz, 1H), 4.56 (s, 2H), 2.20 (dd, *J* = 1.5, 0.8 Hz, 3H), 2.12 (dd, *J* = 1.5, 0.8 Hz, 3H), 0.94 (s, 9H), 0.16 (s, 6H). <sup>13</sup>C NMR (101 MHz, CDCl<sub>3</sub>) δ 179.3, 145.5, 144.0, 141.9, 140.2, 135.8, 129.6, 129.4, 128.2, 115.5, 113.5, 92.0, 84.2, 51.7, 25.7, 23.9, 21.7, 18.2, -5.2. HRMS (ESI) [M+Na]<sup>+</sup> calculated for C<sub>20</sub>H<sub>28</sub>O<sub>2</sub>SiNa<sup>+</sup>: 351.1751, found 351.1759.

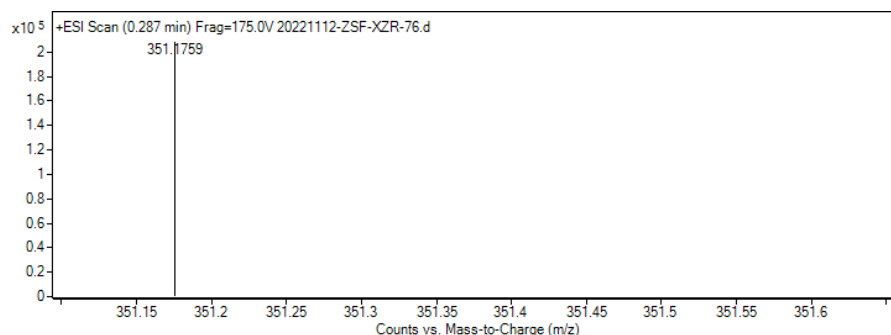

#### N,4-dimethyl-N-(4-oxo-4-(2-(prop-1-en-2-yl)phenyl)but-2-yn-1-yl)benzenesulfonamide(3p)

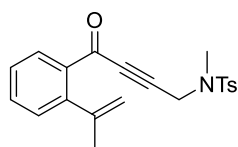

Yellow liquid, purified by chromatography (PE/EA = 3/1, R<sub>f</sub> = 0.5); <sup>1</sup>H NMR (400 MHz, Chloroform-*d*) δ 7.73 (d, *J* = 8.3 Hz, 2H), 7.67 (dd, *J* = 7.7, 1.4 Hz, 1H), 7.52 (td, *J* = 7.5, 1.4 Hz, 1H), 7.33 (td, *J* = 7.6, 1.3 Hz, 1H), 7.28 – 7.22 (m, 3H), 5.14 (t, *J* = 1.6 Hz, 1H), 4.91 – 4.71 (m, 1H), 4.30 (s, 2H), 2.91 (s, 3H), 2.31 (s, 3H), 2.05 (t, *J* = 1.2 Hz, 3H). <sup>13</sup>C NMR (101 MHz, Chloroform-*d*) δ 178.2, 145.8, 145.2, 144.1, 135.1, 133.8, 132.9, 131.3, 129.7, 127.9, 127.0, 115.1, 85.5, 84.9, 40.2, 34.9, 23.8, 21.5. HRMS (ESI) [M+Na]<sup>+</sup> calculated for C<sub>21</sub>H<sub>21</sub>NO<sub>3</sub>SN<sup>+</sup>: 390.1134 found 390.1139.

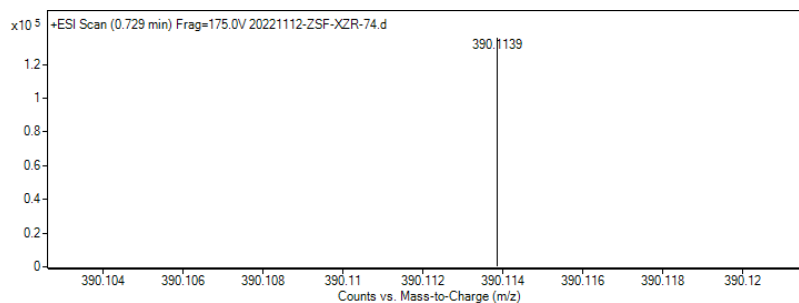



#### 4-((tert-butyldimethylsilyloxy)-4-methyl-1-(2-(prop-1-en-2-yl)phenyl)pent-2-yn-1-one (3r)

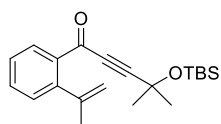

Yellow liquid, purified by chromatography (PE/EA = 10/1,  $R_f$  = 0.5);  $^1\text{H NMR}$  (400 MHz, Chloroform- $d$ )  $\delta$  7.95 (dd,  $J$  = 7.8, 1.4 Hz, 1H), 7.49 (td,  $J$  = 7.5, 1.4 Hz, 1H), 7.37 (td,  $J$  = 7.6, 1.3 Hz, 1H), 7.27 – 7.24 (m, 1H), 5.15 (t,  $J$  = 1.6 Hz, 1H), 4.87 (dd,  $J$  = 1.8, 0.9 Hz, 1H), 2.10 (t,  $J$  = 1.2 Hz, 3H), 1.56 (s, 6H), 0.87 (s, 9H), 0.18 (s, 6H).  $^{13}\text{C NMR}$  (101 MHz, Chloroform- $d$ )  $\delta$  179.4, 145.8, 145.0, 136.0, 132.5, 131.1, 129.6, 127.0, 115.3, 97.8, 82.2, 66.5, 32.2, 25.6, 24.0, 17.9, -3.0. **HRMS** (ESI)  $[\text{M}+\text{Na}]^+$  calculated for  $\text{C}_{21}\text{H}_{30}\text{O}_2\text{SiNa}^+$ : 365.1907, found 365.1914.

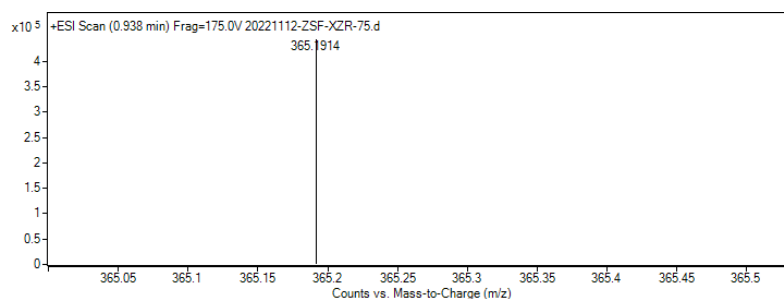

#### 4-hydroxy-1-(2-(prop-1-en-2-yl)phenyl)but-2-yn-1-one (1b)

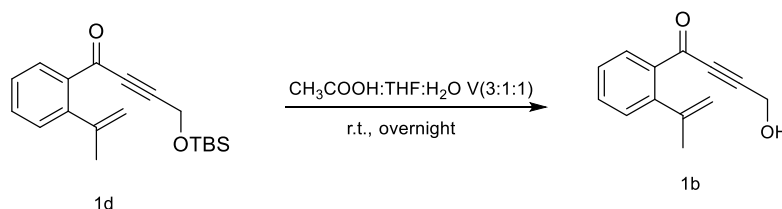

To the solution of **1d** (628 mg, 2 mmol) in 2 mL THF, acetic acid (6 mL) and  $\text{H}_2\text{O}$  (2 mL) was added and the mixture was stirred at room temperature at overnight. After the complete consumption of **1d** determined by TLC, the reaction mixture was filtered through silica gel and the filtrate was concentrated by rotary evaporator. The resulting residue was flash chromatographed (PE: EA = 5:1) on silica gel to afford the product **1b** in 80% yield, 320 mg.

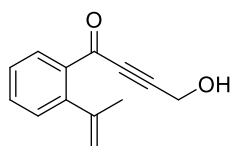

Colorless liquid, purified by chromatography (PE/EA = 5/1,  $R_f$  = 0.5);  $^1\text{H NMR}$  (500 MHz, Chloroform- $d$ )  $\delta$  7.99 (dd,  $J$  = 7.7, 1.3 Hz, 1H), 7.50 (td,  $J$  = 7.5, 1.4 Hz, 1H), 7.37 (td,  $J$  = 7.6, 1.3 Hz, 1H), 7.26 (d,  $J$  = 7.6 Hz, 1H), 5.15 (t,  $J$  = 1.6 Hz, 1H), 4.86 (s, 1H), 4.51 (s, 2H), 2.54 (s, 1H), 2.09 (s, 3H).  $^{13}\text{C NMR}$  (126 MHz, Chloroform- $d$ )  $\delta$  179.3, 145.9, 145.2, 135.4, 132.8, 131.4, 129.7, 127.2, 115.4, 91.4, 84.8, 51.0, 23.9. **HRMS** (ESI)  $[\text{M}+\text{Na}]^+$  calculated for  $\text{C}_{13}\text{H}_{12}\text{O}_2\text{Na}^+$ : 223.0729, found 223.0722.

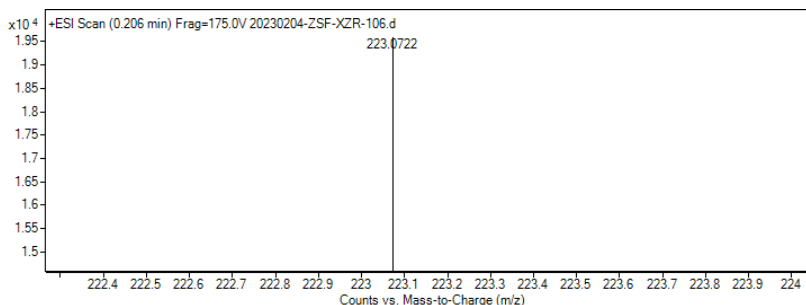

### Typical procedure B<sup>[1]</sup>:

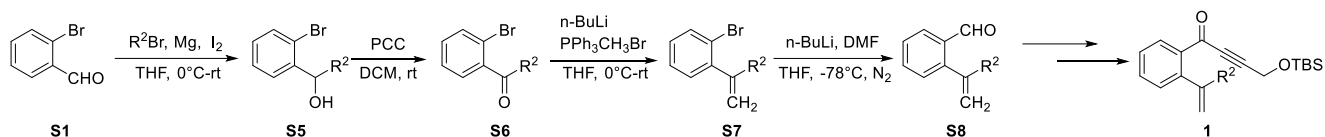

Into a round-bottom flask containing of magnesium (10.5 mmol, 1.05 equiv) was equipped with a condenser, anhydrous THF (10 mL) was introduced to cover the magnesium, and I<sub>2</sub> (10 mg) was added. As the contents of the flask were stirred, corresponding bromide (12 mmol, 1.2 equiv, 1 M in THF) was added dropwise by syringe at 0°C. The mixture was stirred for an additional one hour at room temperature. After the formation of Grignard reagent, the reaction mixture was cooled to 0 °C and **S1** (10 mmol, 1.0 equiv) was added dropwise by syringe. The reaction was quenched with H<sub>2</sub>O and HCl (1 M). The aqueous layer was extracted with EA and the combined organic layers were dried over Na<sub>2</sub>SO<sub>4</sub>, filtrated and concentrated in vacuum. The crude product was applied to flash column chromatography eluted with PE/EA = 10/1 to obtain **S5**.

PCC (Pyridinium Chlorochromate, (9.6 mmol, 1.2 equiv)) was added into a solution of **S5** (8 mmol, 1.0 equiv) in dichloromethane (DCM, 30 mL). The reaction was stirred at room temperature and monitored by TLC. After the **S5** was completely consumed, the reaction mixture was poured into water and extracted with DCM (3×10 mL). The organic phase was washed with brine and dried with anhydrous Na<sub>2</sub>SO<sub>4</sub>. The solvent was distilled using rotary evaporator and the product **S6** was obtained by flash column chromatography eluted with PE/EA = 20/1.

Under N<sub>2</sub> atmosphere, n-BuLi (7.2 mmol, 1.2 equiv, 1.6 M) in hexane was added dropwise into the suspension of CH<sub>3</sub>PPh<sub>3</sub>Br (7.2 mmol, 1.2 equiv) in anhydrous THF (20 mL) at 0 °C. The reaction mixture was stirred for 1 h until it turned to clear orange solution. After **S6** (6 mmol, 1.0 equiv) dissolved in anhydrous THF (4 mL) was added into the reaction dropwise, the reaction temperature was raised to room temperature and maintained until the entire consumption of **S6**. And then the reaction was quenched using 5 mL saturated NH<sub>4</sub>Cl (aq), and extracted with EtOAc (2×20 mL). The organic phase was washed with brine and dried with anhydrous Na<sub>2</sub>SO<sub>4</sub>, the solvent was removed by rotary evaporator. The resulting residue was purified by chromatography (SiO<sub>2</sub>, PE) to yield **S7**.

Under N<sub>2</sub> atmosphere, n-BuLi (6 mmol, 1.5 equiv 1.6 M) in hexane was added dropwise into the solution of **S7** (4 mmol, 1.0 equiv) in anhydrous THF (6 mL) at -78 °C. The reaction mixture was stirred for 1 h before DMF (8 mmol, 2.0 equiv) dissolved in anhydrous THF (1 mL) was added into the reaction dropwise. The reaction temperature was raised to room temperature and maintained until the entire consumption of **S7**. And then the reaction was quenched using 5 mL saturated NH<sub>4</sub>Cl (aq), and extracted with EtOAc (2×20 mL). The organic phase was washed with brine and dried with anhydrous Na<sub>2</sub>SO<sub>4</sub>, the solvent was removed by rotary evaporator. The resulting residue was purified by chromatography (SiO<sub>2</sub>, PE/EA = 100/1) to yield **S8**.

The substrates such as **3a**, **3b**, **3g** and **3h** were synthesized according to **General procedure B**.

#### 1-(2-(but-1-en-2-yl)phenyl)-4-((tert-butyldimethylsilyloxy)but-2-yn-1-one (**3a**)

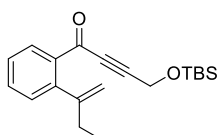

Yellow liquid, purified by chromatography (PE/EA = 10/1, R<sub>f</sub> = 0.5); <sup>1</sup>H NMR (400 MHz, Chloroform-*d*) δ 8.02 (dd, *J* = 7.8, 1.4 Hz, 1H), 7.49 (td, *J* = 7.5, 1.4 Hz, 1H), 7.37 (td, *J* = 7.6, 1.3 Hz, 1H), 7.22 (dd, *J* = 7.6, 1.3 Hz, 1H), 5.14 (q, *J* = 1.6 Hz, 1H), 4.88 (q, *J* = 1.2 Hz, 1H), 4.53 (s, 2H), 2.38 (qt, *J* = 7.4, 1.4

Hz, 2H), 1.07 (t,  $J = 7.4$  Hz, 3H), 0.92 (s, 9H), 0.14 (s, 6H).  $^{13}\text{C}$  NMR (101 MHz, Chloroform- $d$ )  $\delta$  179.0, 151.8, 144.9, 135.6, 132.5, 131.6, 130.3, 127.0, 112.6, 91.8, 84.2, 51.7, 30.1, 25.7, 18.3, 12.5, -5.2. HRMS (ESI)  $[\text{M}+\text{Na}]^+$  calculated for  $\text{C}_{20}\text{H}_{28}\text{O}_2\text{SiNa}^+$ : 351.1751, found 351.1757.

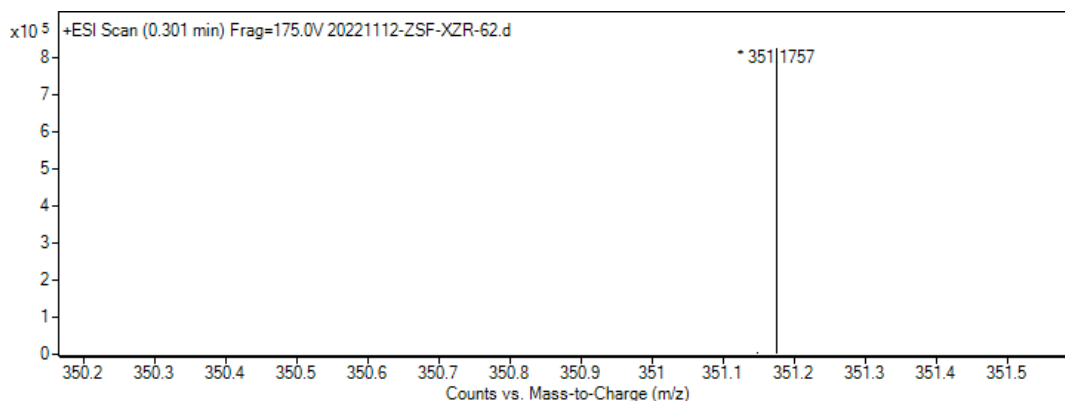

#### 4-((tert-butyldimethylsilyloxy)-1-(2-(oct-1-en-2-yl)phenyl)but-2-yn-1-one (3b)

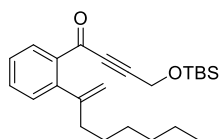

Colorless liquid, purified by chromatography (PE/EA = 10/1,  $R_f = 0.5$ );  $^1\text{H}$  NMR (500 MHz, Chloroform- $d$ )  $\delta$  8.02 (dd,  $J = 7.8, 1.5$  Hz, 1H), 7.46 (td,  $J = 7.5, 1.4$  Hz, 1H), 7.34 (td,  $J = 7.6, 1.3$  Hz, 1H), 7.18 (dd,  $J = 7.6, 1.3$  Hz, 1H), 5.10 (d,  $J = 1.5$  Hz, 1H), 4.86 (d,  $J = 1.6$  Hz, 1H), 4.51 (s, 2H), 2.37 – 2.27 (m, 2H), 1.37 (q,  $J = 7.9$  Hz, 2H), 1.30 – 1.20 (m, 6H), 0.90 (s, 9H), 0.83 (t,  $J = 6.9$  Hz, 3H), 0.12 (s, 6H).  $^{13}\text{C}$  NMR (126 MHz, Chloroform- $d$ )  $\delta$  178.9, 150.8, 144.9, 135.5, 132.5, 131.7, 130.5, 127.0, 113.3, 91.9, 84.2, 51.8, 37.4, 31.8, 29.1, 28.2, 25.7, 22.6, 18.3, 14.1, -5.2. HRMS (ESI)  $[\text{M}+\text{Na}]^+$  calculated for  $\text{C}_{24}\text{H}_{36}\text{O}_2\text{SiNa}^+$ : 407.2377, found 407.2368.

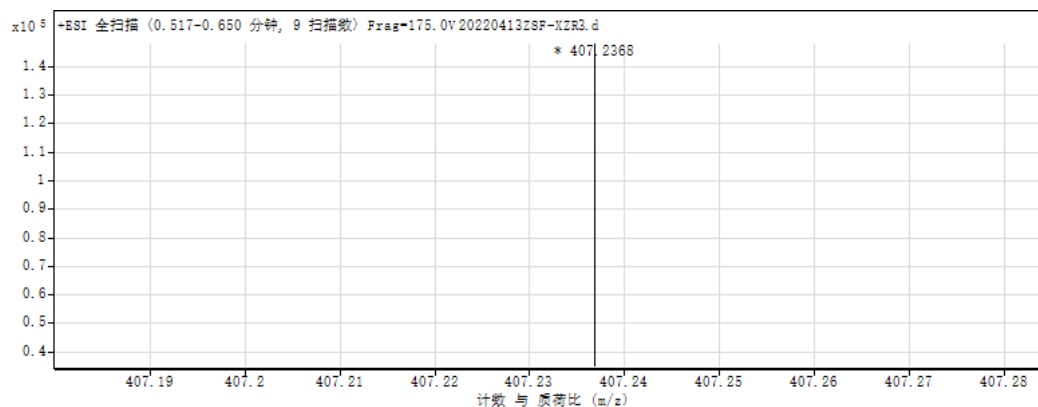

#### 4-((tert-butyldimethylsilyloxy)-1-(2-(5-phenylpent-1-en-2-yl)phenyl)but-2-yn-1-one (3g)

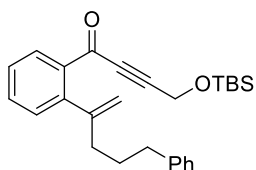

Yellow liquid, purified by chromatography (PE/EA = 10/1,  $R_f = 0.5$ );  $^1\text{H}$  NMR (400 MHz, Chloroform- $d$ )  $\delta$  8.05 (dd,  $J = 7.8, 1.4$  Hz, 1H), 7.48 (td,  $J = 7.5, 1.4$  Hz, 1H), 7.38 (td,  $J = 7.6, 1.3$  Hz, 1H), 7.26 – 7.23 (m, 2H), 7.21 (dd,  $J = 7.5, 1.3$  Hz, 1H), 7.18 – 7.11 (m, 3H), 5.15 (q,  $J = 1.5$  Hz, 1H), 4.92 (d,  $J = 1.5$  Hz, 1H), 4.52 (s, 2H), 2.69 – 2.54 (m, 2H), 2.42 (t,  $J = 7.8$  Hz, 2H), 1.85 – 1.63 (m, 2H), 0.93 (s, 9H), 0.15 (s, 6H).  $^{13}\text{C}$  NMR (101 MHz, Chloroform- $d$ )  $\delta$  178.8, 150.2, 144.6, 142.4, 135.5, 132.9, 131.9, 130.5, 128.4, 128.3, 127.1, 125.9, 113.7, 91.9, 84.1, 51.7, 37.0, 35.6, 30.0, 25.7, 18.3, -5.2. HRMS (ESI)  $[\text{M}+\text{Na}]^+$  calculated for  $\text{C}_{27}\text{H}_{34}\text{O}_2\text{SiNa}^+$ : 441.2220, found 441.2227.

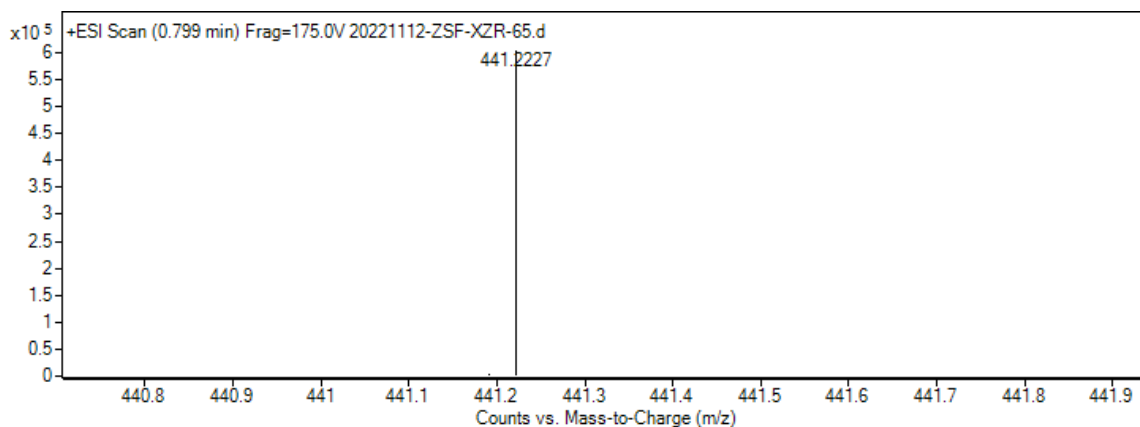

**4-((tert-butyldimethylsilyloxy)-1-(2-(hexa-1,5-dien-2-yl)phenyl)but-2-yn-1-one (3h)**

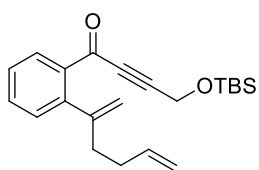

Yellow liquid, purified by chromatography (PE/EA = 10/1, R<sub>f</sub> = 0.5); <sup>1</sup>H NMR (400 MHz, Chloroform-*d*) δ 8.06 (dd, *J* = 7.7, 1.4 Hz, 1H), 7.49 (td, *J* = 7.5, 1.4 Hz, 1H), 7.38 (td, *J* = 7.6, 1.3 Hz, 1H), 7.21 (dd, *J* = 7.6, 1.4 Hz, 1H), 5.88 – 5.74 (m, 1H), 5.15 (q, *J* = 1.5 Hz, 1H), 5.00 (dd, *J* = 17.1, 1.8 Hz, 1H), 4.95 (dt, *J* = 10.2, 1.6 Hz, 1H), 4.92 – 4.90 (m, 1H), 4.54 (s, 2H), 2.46 (dd, *J* = 9.1, 6.5 Hz, 2H), 2.24 – 2.11 (m, 2H), 0.93 (s, 9H), 0.15 (s, 6H). <sup>13</sup>C NMR (101 MHz,

Chloroform-*d*) δ 178.7, 149.9, 144.5, 138.2, 135.4, 132.6, 131.9, 130.6, 127.1, 114.7, 113.7, 91.9, 51.7, 36.5, 32.3, 25.7, 18.3, -5.2. **HRMS** (ESI) [M+Na]<sup>+</sup> calculated for C<sub>22</sub>H<sub>30</sub>O<sub>2</sub>SiNa<sup>+</sup>: 377.1907, found 377.1915.

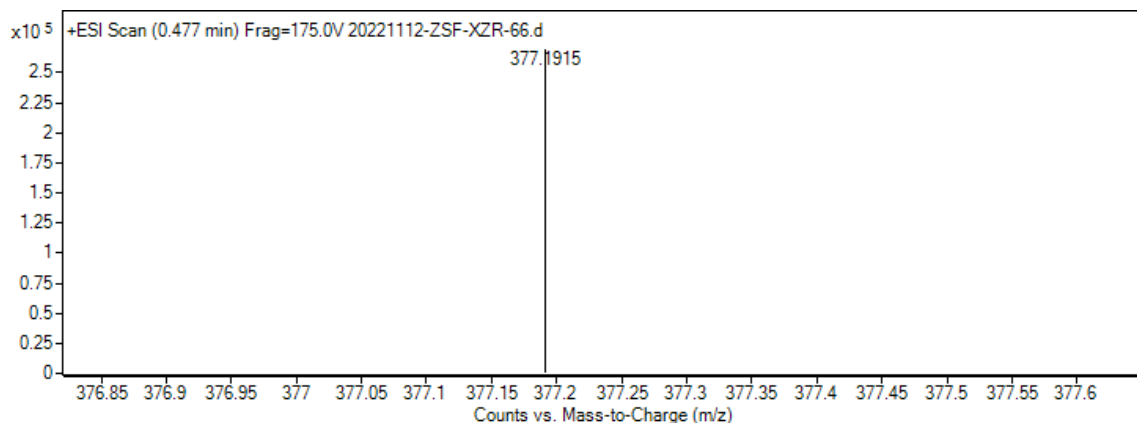

### Typical procedure C:<sup>[2]</sup>

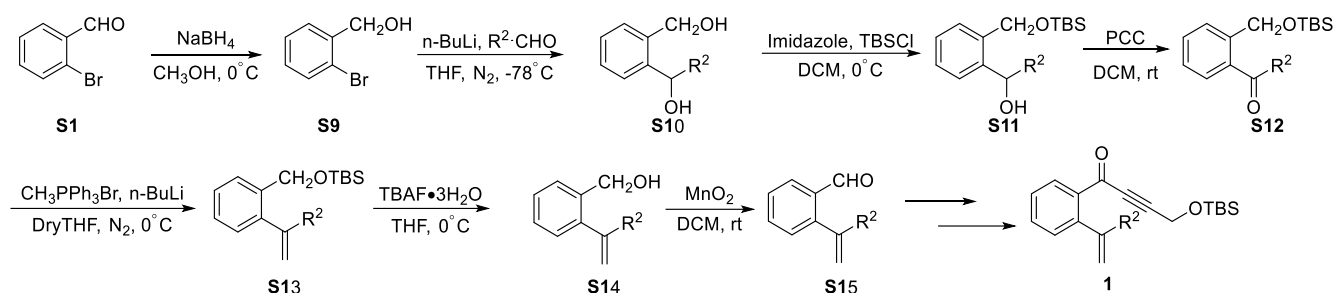

NaBH<sub>4</sub> (15 mmol, 1.5 equiv) was added into a solution of **S1** (10 mmol, 1.0 equiv) in methanol (CH<sub>3</sub>OH, 40 mL). The reaction was stirred at 0 °C and monitored by TLC. After the **S1** was completely consumed, the reaction mixture was poured into water and extracted with EA (3×10 mL). The organic phase was washed with brine and dried with anhydrous Na<sub>2</sub>SO<sub>4</sub>. The solvent was distilled using rotary evaporator and the product **S9** was obtained by flash column chromatography eluted with PE/EA = 5/1.

Under N<sub>2</sub> atmosphere, n-BuLi (17.6 mmol, 2.2 equiv 1.6 M) in hexane was added dropwise into the solution of **S9** (8 mmol, 1.0 equiv) in anhydrous THF (40 mL) at -78 °C. The reaction mixture was stirred for 1 h before corresponding aldehyde (9.6 mmol, 1.2 equiv) dissolved in anhydrous THF (3 mL) was added into the reaction dropwise. The reaction temperature was raised to room temperature and maintained until the entire consumption of **S9**. And then the reaction was quenched using 10 mL saturated NH<sub>4</sub>Cl (aq), and extracted with EtOAc (2×20 mL). The organic phase was washed with brine and dried with anhydrous Na<sub>2</sub>SO<sub>4</sub>, the solvent was removed by rotary evaporator. The resulting residue was purified by chromatography (SiO<sub>2</sub>, PE/EA = 1/1) to yield **S10**.

To the solution of **S10** (6 mmol, 1.0 equiv) in 30 mL DCM, 1H-imidazole (7.2 mmol, 1.2 equiv), TBSCl (7.2 mmol, 1.2 equiv) was added and the mixture was stirred at room temperature for about 1 h. After the complete consumption of **S10** determined by TLC. And then the reaction was quenched using 10 mL saturated NH<sub>4</sub>Cl (aq), and extracted with DCM (2×20 mL). The organic phase was washed with brine and dried with anhydrous Na<sub>2</sub>SO<sub>4</sub>, the solvent was removed by rotary evaporator. The resulting residue was purified by chromatography (SiO<sub>2</sub>, PE/EA = 10/1) to yield **S11**.

PCC (Pyridinium Chlorochromate, (6.72 mmol, 1.2 equiv)) was added into a solution of **S11** (5.6 mmol, 1.0 equiv) in dichloromethane (DCM, 20 mL). The reaction was stirred at room temperature and monitored by TLC. After the **S11** was completely consumed, the reaction mixture was poured into water and extracted with DCM (3×10 mL). The organic phase was washed with brine and dried with anhydrous Na<sub>2</sub>SO<sub>4</sub>. The solvent was distilled using rotary evaporator and the product **S12** was obtained by flash column chromatography eluted with PE/EA = 20/1.

Under N<sub>2</sub> atmosphere, n-BuLi (6 mmol, 1.2 equiv, 1.6 M) in hexane was added dropwise into the suspension of CH<sub>3</sub>PPh<sub>3</sub>Br (6 mmol, 1.2 equiv) in anhydrous THF (25 mL) at 0 °C. The reaction mixture was stirred for 1 h until it turned to clear orange solution. After **S12** (5 mmol, 1.0 equiv) dissolved in anhydrous THF (4 mL) was added into the reaction dropwise, the reaction temperature was raised to room temperature and maintained until the entire consumption of **S12**. And then the reaction was quenched using 5 mL saturated NH<sub>4</sub>Cl (aq), and extracted with EtOAc (2×20 mL). The organic phase was washed with brine and dried with anhydrous Na<sub>2</sub>SO<sub>4</sub>, the solvent was removed by rotary evaporator. The resulting residue was purified by chromatography (SiO<sub>2</sub>, PE) to yield **S13**.

To a solution of **S13** (1.0 eq) in THF (0.25 M) was added TBAF•3H<sub>2</sub>O (1.2 equiv) at room temperature and the mixture was stirred for 5 minutes. The mixture was poured into a separatory funnel and water was added. The aqueous was extracted with EtOAc for three times and the collected organic phase was washed with brine. The organic phase was dried with Na<sub>2</sub>SO<sub>4</sub> and collected by vacuum into a round bottom flask. The crude product was purified by column chromatography (PE/EA=10:1) to afford **S14** in 59% yield as the yellow oil.

To the solution of **S14** (3 mmol, 1.0 equiv) in 10 mL DCM, activated MnO<sub>2</sub> (30 mmol, 10 equiv) was added and the mixture was stirred at room temperature for about 3 h. After the complete consumption of **S14** determined by TLC, the reaction mixture was filtered through silica gel and the filtrate was concentrated by rotary evaporator. The resulting residue was flash chromatographed (PE/EA = 20:1) on silica gel to afford **S15**.

The substrates such as **3c**, **3d**, **3e**, **3f**, **3l** and **3m** were synthesized according to **General procedure C**.

#### 4-((tert-butyldimethylsilyloxy)-1-(2-(3,3-dimethylbut-1-en-2-yl)phenyl)but-2-yn-1-one (**3c**)

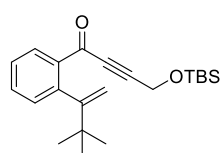

Colorless liquid, purified by chromatography (PE/EA = 10/1, R<sub>f</sub> = 0.5); <sup>1</sup>H NMR (400 MHz, Chloroform-*d*) δ 8.09 (dd, *J* = 7.8, 1.5 Hz, 1H), 7.45 (dd, *J* = 7.5, 1.5 Hz, 1H), 7.38 (dd, *J* = 7.6, 1.4 Hz, 1H), 7.16 (dd, *J* = 7.6, 1.3 Hz, 1H), 5.27 (d, *J* = 1.1 Hz, 1H), 4.79 (d, *J* = 1.1 Hz, 1H), 4.54 (s, 2H), 1.12 (s, 10H), 0.92 (s, 9H), 0.14 (s, 6H). <sup>13</sup>C NMR (101 MHz, Chloroform-*d*) δ 178.7, 157.8, 143.8, 136.1, 131.8, 131.8, 131.0, 126.6, 112.2, 91.8, 84.4, 51.8, 36.6, 30.2, 25.7, 18.3, -5.2. HRMS (ESI) [M+Na]<sup>+</sup> calculated for C<sub>22</sub>H<sub>32</sub>O<sub>2</sub>SiNa<sup>+</sup>: 379.2064, found 379.2070.

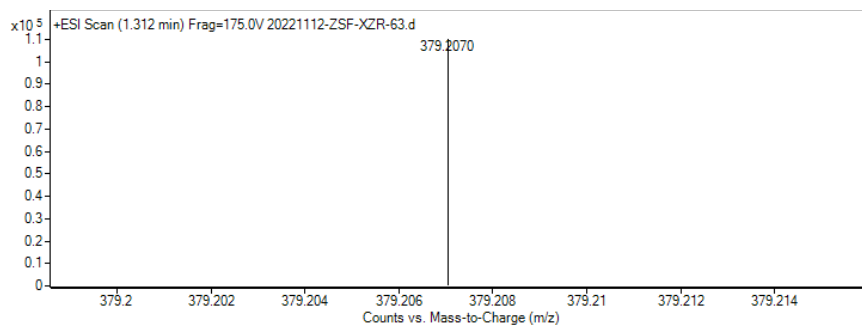

#### 4-((tert-butyldimethylsilyloxy)-1-(2-(1-cyclopropylvinyl)phenyl)but-2-yn-1-one (**3d**)

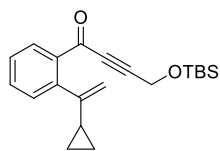

Colorless liquid, purified by chromatography (PE/EA = 10/1, R<sub>f</sub> = 0.5); <sup>1</sup>H NMR (500 MHz, Chloroform-*d*) δ 8.00 (dd, *J* = 7.8, 1.4 Hz, 1H), 7.47 (dd, *J* = 7.5, 1.4 Hz, 1H), 7.38 (td, *J* = 7.6, 1.3 Hz, 1H), 7.22 (dd, *J* = 7.6, 1.3 Hz, 1H), 5.06 (s, 1H), 4.82 (d, *J* = 1.2 Hz, 1H), 4.54 (s, 2H), 1.72 – 1.65 (m, 1H), 0.92 (s, 9H), 0.76 – 0.70 (m, 2H), 0.50 – 0.46 (m, 2H), 0.14 (s, 6H). <sup>13</sup>C NMR (126 MHz, Chloroform-*d*) δ 179.0, 151.1, 143.5, 136.1, 132.3, 131.2, 130.8, 127.1, 111.4, 92.0, 84.3, 51.8, 25.7, 18.3, 17.3, 7.1, -5.2. HRMS (ESI) [M+Na]<sup>+</sup> calculated for C<sub>21</sub>H<sub>28</sub>O<sub>2</sub>SiNa<sup>+</sup>: 363.1751, found 363.1759.

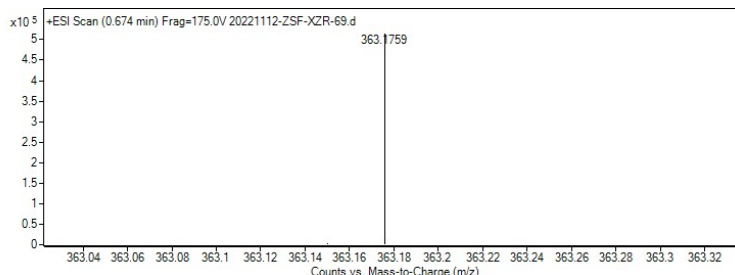

#### 4-((tert-butyldimethylsilyloxy)-1-(2-(1-cyclopentylvinyl)phenyl)but-2-yn-1-one (3e)

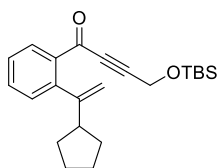

Yellow liquid, purified by chromatography (PE/EA = 10/1,  $R_f$  = 0.5);  $^1\text{H NMR}$  (400 MHz, Chloroform- $d$ )  $\delta$  8.07 (d,  $J$  = 7.7 Hz, 1H), 7.58 – 7.45 (m, 1H), 7.39 (t,  $J$  = 7.6 Hz, 1H), 7.22 (d,  $J$  = 7.6 Hz, 1H), 5.18 (s, 1H), 4.90 (s, 1H), 4.56 (s, 2H), 2.72 (p,  $J$  = 8.3 Hz, 1H), 1.87 – 1.76 (m, 2H), 1.70 (td,  $J$  = 6.6, 3.6 Hz, 2H), 1.57 (dt,  $J$  = 9.3, 4.7 Hz, 2H), 1.51 – 1.38 (m, 2H), 0.95 (s, 9H), 0.17 (s, 6H).  $^{13}\text{C NMR}$  (101 MHz, Chloroform- $d$ )  $\delta$  178.9, 154.0, 145.5, 135.3, 132.5, 131.8, 130.5, 126.8, 111.3, 91.9, 84.2, 51.8, 46.6, 32.0, 25.7, 24.7, 18.3, -5.2. **HRMS** (ESI)  $[\text{M}+\text{Na}]^+$  calculated for  $\text{C}_{23}\text{H}_{32}\text{O}_2\text{SiNa}^+$ : 391.2064, found 391.2072.

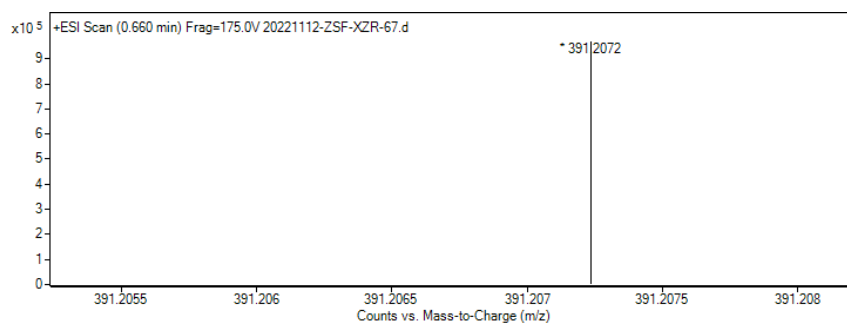

#### 4-((tert-butyldimethylsilyloxy)-1-(2-(1-cyclohexylvinyl)phenyl)but-2-yn-1-one (3f)

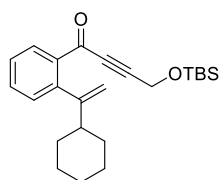

Colorless liquid, purified by chromatography (PE/EA = 10/1,  $R_f$  = 0.5);  $^1\text{H NMR}$  (400 MHz, Chloroform- $d$ )  $\delta$  8.08 (dd,  $J$  = 7.8, 1.4 Hz, 1H), 7.47 (dd,  $J$  = 7.5, 1.5 Hz, 1H), 7.37 (td,  $J$  = 7.6, 1.4 Hz, 1H), 7.18 (dd,  $J$  = 7.5, 1.4 Hz, 1H), 5.10 (s, 1H), 4.86 (d,  $J$  = 1.3 Hz, 1H), 4.54 (s, 2H), 2.07 (d,  $J$  = 11.1 Hz, 1H), 1.85 (d,  $J$  = 10.3 Hz, 2H), 1.77 – 1.69 (m, 2H), 1.29 – 1.11 (m, 6H), 0.93 (s, 9H), 0.15 (s, 6H).  $^{13}\text{C NMR}$  (101 MHz, Chloroform- $d$ )  $\delta$  178.8, 156.0, 145.3, 135.2, 132.4, 132.1, 131.1, 126.9, 110.8, 91.9, 84.1, 51.8, 44.5, 32.4, 26.7, 26.4, 25.7, 18.3, -5.2. **HRMS** (ESI)  $[\text{M}+\text{Na}]^+$  calculated for  $\text{C}_{24}\text{H}_{34}\text{O}_2\text{SiNa}^+$ : 405.222, found 405.2227.

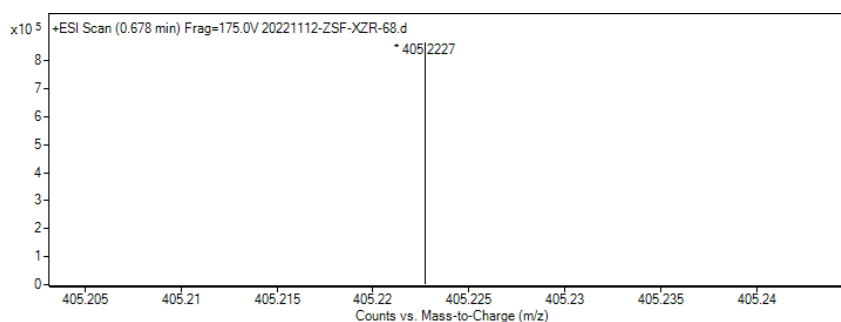

#### 4-((tert-butyldimethylsilyloxy)-1-(2-(1-(4-methoxyphenyl)vinyl)phenyl)but-2-yn-1-one(3l)

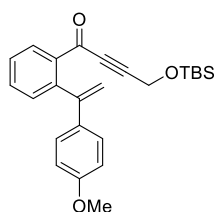

Yellow liquid, purified by chromatography (PE/EA = 10/1, Rf = 0.5);  $^1\text{H NMR}$  (500 MHz, Chloroform-*d*)  $\delta$  8.05 (dd,  $J = 7.8, 1.5$  Hz, 1H), 7.58 (td,  $J = 7.5, 1.4$  Hz, 1H), 7.49 (td,  $J = 7.6, 1.3$  Hz, 1H), 7.38 (dd,  $J = 7.6, 1.3$  Hz, 1H), 7.25 – 7.20 (m, 2H), 6.86 – 6.80 (m, 2H), 5.68 (d,  $J = 1.0$  Hz, 1H), 5.15 (d,  $J = 1.0$  Hz, 1H), 4.38 (s, 2H), 3.82 (s, 3H), 0.93 (s, 9H).  $^{13}\text{C NMR}$  (126 MHz, Chloroform-*d*)  $\delta$  178.7, 159.2, 148.3, 143.0, 137.1, 133.4, 132.5, 131.6, 131.1, 128.1, 127.7, 113.9, 113.6, 92.0, 84.1, 55.2, 51.6, 25.7, 18.3, -5.2.

**HRMS** (ESI)  $[\text{M}+\text{H}]^+$  calculated for  $\text{C}_{25}\text{H}_{31}\text{O}_3\text{Si}^+$ : 407.2037, found 407.2027.

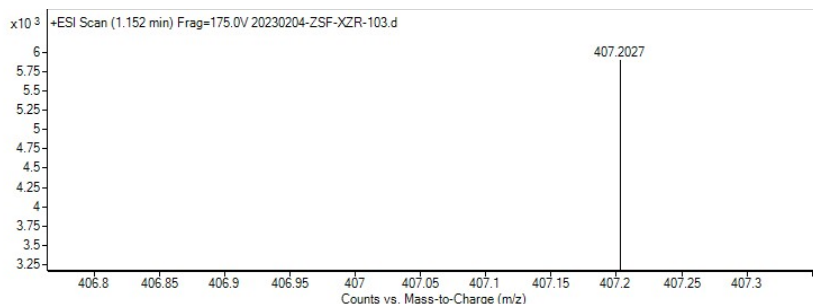

#### 4-((tert-butyldimethylsilyloxy)-1-(2-(1-(4-fluorophenyl)vinyl)phenyl)but-2-yn-1-one (3m)

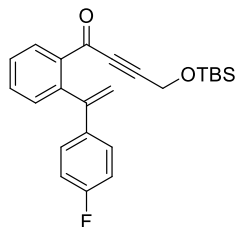

Yellow liquid, purified by chromatography (PE/EA = 21/1, Rf = 0.5);  $^1\text{H NMR}$  (500 MHz, Chloroform-*d*)  $\delta$  8.09 (dd,  $J = 7.8, 1.4$  Hz, 1H), 7.60 (td,  $J = 7.5, 1.4$  Hz, 1H), 7.51 (td,  $J = 7.6, 1.3$  Hz, 1H), 7.38 (dd,  $J = 7.5, 1.3$  Hz, 1H), 7.28 – 7.20 (m, 2H), 6.98 (t,  $J = 8.7$  Hz, 2H), 5.68 (s, 1H), 5.23 (s, 1H), 4.41 (s, 2H), 0.92 (s, 9H), 0.12 (s, 6H).  $^{13}\text{C NMR}$  (126 MHz, Chloroform-*d*)  $\delta$  177.2, 164.9 (d,  $J = 256.3$  Hz), 148.5 (d,  $J = 8.9$  Hz), 145.1 (d,  $J = 1.0$  Hz), 134.5 (d,  $J = 9.8$  Hz), 131.9 (d,  $J = 2.8$  Hz), 117.0 (d,  $J = 21.7$  Hz), 115.5, 114.0 (d,  $J = 21.6$  Hz), 92.0, 83.8, 51.7, 25.7, 23.6, 18.3, -5.2.  $^{19}\text{F NMR}$  (471 MHz, Chloroform-*d*)  $\delta$  -114.81. **HRMS** (ESI)  $[\text{M}+\text{Na}]^+$  calculated for  $\text{C}_{24}\text{H}_{27}\text{FO}_2\text{SiNa}^+$ : 417.1656, found 417.1649.

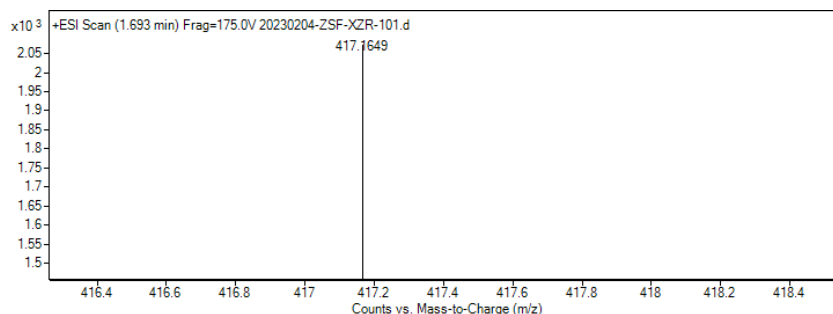



### Typical procedure D:<sup>[1][3][4]</sup>

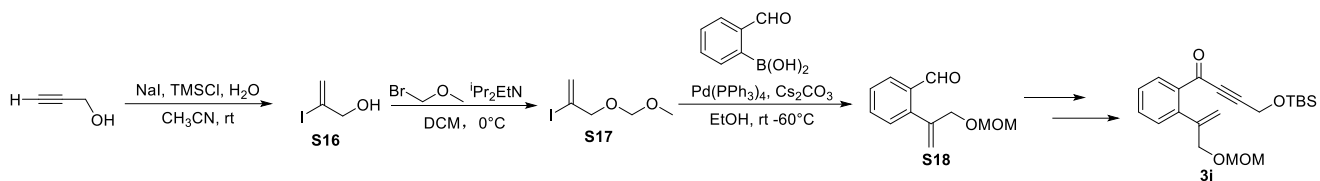

A solution of NaI (3.60 g, 24.0 mmol) in MeCN (40 mL) was allowed to cool to 0 °C and then charged with TMSCl (3.05 mL, 24.0 mmol). The mixture was allowed to stir for 30 min at 0 °C, after which H<sub>2</sub>O (216 μL, 12.0 mmol) was added, immediately followed by propargyl alcohol (1.16 mL, 20.0 mmol). The solution was allowed to stir at 23 °C for 6 h, and then quenched by the addition of a saturated solution of aqueous NaHCO<sub>3</sub> (110 mL). The mixture was washed with Et<sub>2</sub>O (3 × 70 mL). The combined organic layers were washed with a saturated solution of aqueous Na<sub>2</sub>S<sub>2</sub>O<sub>3</sub> (3 × 90 mL) and dried over Na<sub>2</sub>SO<sub>4</sub> and then filtered. The resultant organic layer was evaporated in vacuo to afford dark oil, which was purified by silica gel chromatography (PE/EtOAc = 8/2) to furnish **S16** as colorless oil (2.4 g, 65% yield).

To a cooled (0 °C) solution of **S16** (5 mmol, 1.0 equiv), diisopropylethylamine (10 mmol, 2.0 equiv) in dichloromethane (25 mL) was added dropwise bromo(methoxy)methane (10 mmol, 2.0 equiv). The reaction mixture was stirred for 3 days at rt before being diluted with 15 mL of water. The layers were separated and the aqueous layer was extracted with diethyl ether. Combined organic layer were dried over anhydrous magnesium sulfate, filtered and concentrated. The residue was finally purified by flash chromatography on silica gel (PE/EA = 9/1) to afford the desired product **S17**.

To an N<sub>2</sub>-sparged solution of **S17** (3 mmol, 1.0 equiv), (2-formylphenyl)boronic acid (3.6 mmol, 1.2 equiv) and cesium carbonate (3 mmol, 1.0 equiv) in EtOH (15 mL) was added Pd(PPh<sub>3</sub>)<sub>4</sub> (0.09 mmol, 3 mol%). The mixture was stirred at 60 °C for 12 h. After the reaction completed, it was diluted with water and extracted with EA. The combined organics were washed with brine, dried over anhydrous Na<sub>2</sub>SO<sub>4</sub> and concentrated in vacuo. The resulting residue was flash chromatographed (PE:EA = 30:1) on silica gel to afford the product **S18**.

The substrates such as **3j** were synthesized according to **General procedure D**.

#### 4-((tert-butyldimethylsilyloxy)-1-(2-(3-(methoxymethoxy)prop-1-en-2-yl)phenyl)but-2-yn-1-one (**3j**)

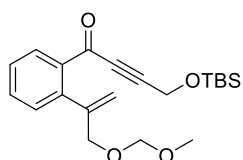

Yellow liquid, purified by chromatography (PE/EA = 10/1, R<sub>f</sub> = 0.5); <sup>1</sup>H NMR (400 MHz, Chloroform-*d*) δ 8.12 (dd, *J* = 7.8, 1.4 Hz, 1H), 7.52 (d, *J* = 1.4 Hz, 1H), 7.42 (d, *J* = 1.4 Hz, 1H), 7.33 – 7.25 (m, 1H), 5.42 (d, *J* = 1.6 Hz, 1H), 5.08 (dt, *J* = 1.8, 0.9 Hz, 1H), 4.65 (s, 2H), 4.55 (s, 2H), 4.31 (t, *J* = 1.2 Hz, 2H), 3.31 (s, 3H), 0.93 (s, 9H), 0.15 (s, 6H). <sup>13</sup>C NMR (101 MHz, Chloroform-*d*) δ 178.4, 146.8, 141.6, 135.5, 132.9, 132.2, 131.3, 127.6, 115.2, 95.6, 92.2, 83.9, 69.9, 55.3, 51.7, 25.7, 18.3, -5.2. HRMS (ESI) [M+Na]<sup>+</sup> calculated for C<sup>21</sup>H<sup>30</sup>O<sup>4</sup>SiNa<sup>+</sup>: 397.1805, found 397.1812.

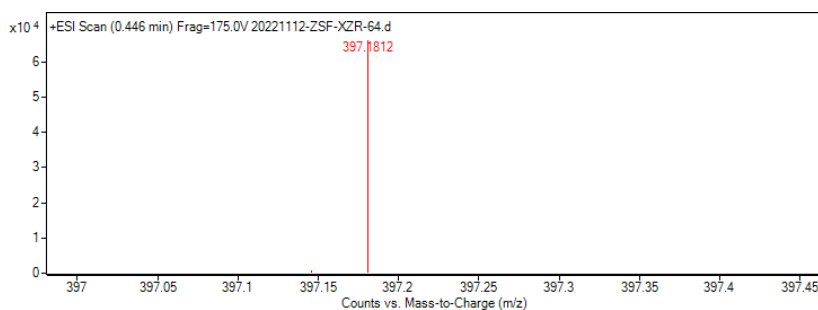

### Typical procedure E:<sup>[1]</sup>

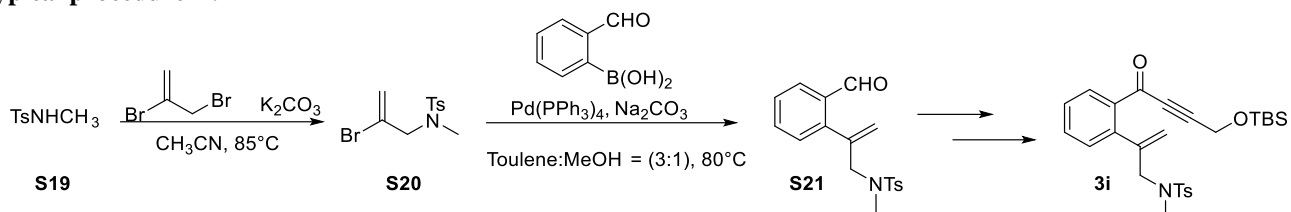

A solution of **S19** (5 mmol, 1.0 equiv) in MeCN (40 mL) charged with 2,3-dibromoprop-1-ene (7.5 mmol, 1.5 equiv) and potassium carbonate (7.5 mmol, 1.5 equiv). The mixture was stirred at 85 °C for 12 h. After the reaction completed, it was diluted with water and extracted with EA. The combined organics were washed with brine dried over anhydrous Na<sub>2</sub>SO<sub>4</sub> and concentrated in vacuo. The resulting residue was flash chromatographed (PE/EA = 3:1) on silica gel to afford the product **S20**.

To an N<sub>2</sub>-sparged solution of **S20** (3 mmol, 1.0 equiv), (2-formylphenyl)boronic acid (4.5 mmol, 1.5 equiv) and sodium carbonate (6 mmol, 2.0 equiv) in Toluene :MeOH (V:V = 3:1, 15 mL) was added Pd(PPh<sub>3</sub>)<sub>4</sub> (0.09 mmol, 3 mol%). The mixture was stirred at 80 °C for 24 h. After the reaction completed, it was diluted with water and extracted with EA. The combined organics were washed with brine dried over anhydrous Na<sub>2</sub>SO<sub>4</sub> and concentrated in vacuo. The resulting residue was flash chromatographed (PE/EA = 5:1) on silica gel to afford the product **S21**.

The substrates such as **3i** were synthesized according to **General procedure E**

### *N*-(2-(2-(4-((tert-butyl(dimethylsilyloxy)but-2-ynyl)phenyl)allyl)-*N*,4-dimethylbenzenesulfonamide (**3i**)

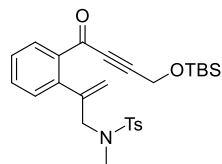

Yellow liquid, purified by chromatography (PE/EA = 5/1, R<sub>f</sub> = 0.5); <sup>1</sup>H NMR (400 MHz, Chloroform-*d*) δ 8.19 (dd, *J* = 7.8, 1.4 Hz, 1H), 7.64 – 7.57 (m, 2H), 7.53 (dd, *J* = 7.5, 1.4 Hz, 1H), 7.44 (td, *J* = 7.6, 1.3 Hz, 1H), 7.29 – 7.23 (m, 3H), 5.36 (d, *J* = 1.4 Hz, 1H), 5.06 (d, *J* = 1.2 Hz, 1H), 4.56 (s, 2H), 3.85 (s, 2H), 2.81 (s, 3H), 2.41 (s, 3H), 0.93 (s, 9H), 0.15 (s, 6H). <sup>13</sup>C NMR (101 MHz, Chloroform-*d*) δ 178.2, 145.1, 143.2, 141.5, 134.9, 134.8, 133.2, 133.0, 131.5, 129.6, 127.8, 127.4, 115.4, 92.4, 83.6, 55.0, 51.7, 34.6, 25.7, 21.5, 18.3, -5.2. HRMS (ESI) [M+H]<sup>+</sup> calculated for C<sub>27</sub>H<sub>36</sub>NO<sub>4</sub>SSi<sup>+</sup>: 498.2129, found 498.2134.

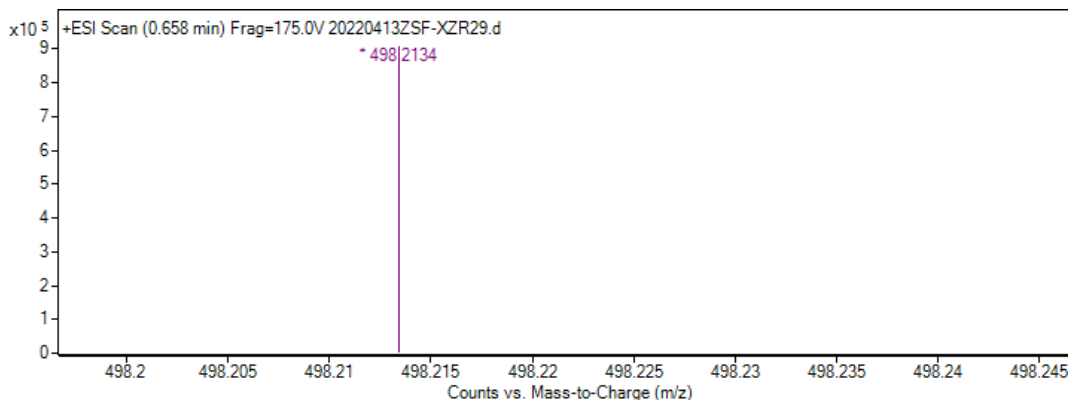

### Typical procedure F <sup>[1][5]</sup>:

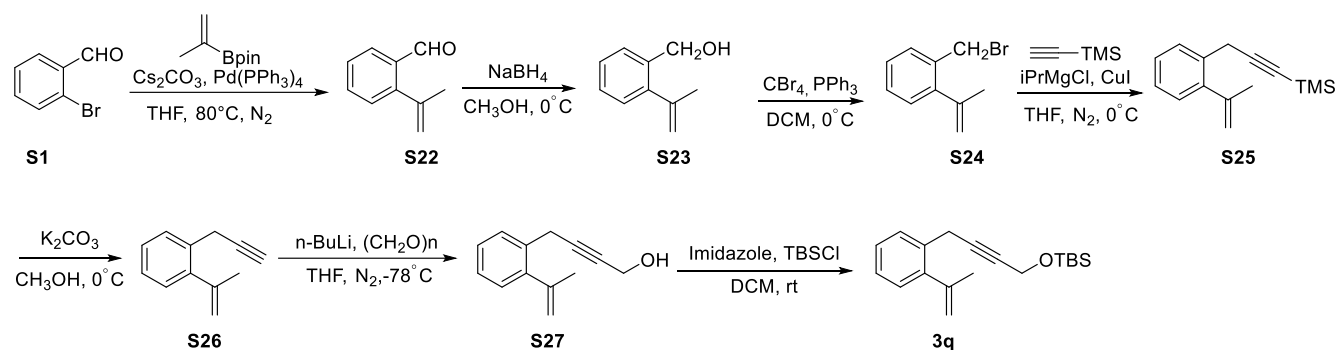

To an N<sub>2</sub>-sparged solution of corresponding bromide **S1** (10 mmol, 1.0 equiv), 2-isopropenylboronic acid pinacol ester (12.0 mmol, 1.2 equiv) and cesium carbonate (30 mmol, 3.0 equiv) in THF (50 mL) was added Pd(PPh<sub>3</sub>)<sub>4</sub> (0.2 mmol, 2 mol%). The mixture was stirred at 80 °C for 12 h. After the reaction completed (monitored by GC-MS), it was diluted with water and extracted with EA. The combined organics were washed with brine dried over anhydrous Na<sub>2</sub>SO<sub>4</sub> and concentrated in vacuo. The resulting residue was flash chromatographed (PE/EA = 200:1) on silica gel to afford the product **S22** in a yield of 92%.

NaBH<sub>4</sub> (13.8 mmol, 1.5 equiv) was added into a solution of **S22** (9.2 mmol, 1.0 equiv) in methanol (CH<sub>3</sub>OH, 40 mL). The reaction was stirred at 0 °C and monitored by TLC. After the **S22** was completely consumed, the reaction mixture was poured into water and extracted with EA (3×10 mL). The organic phase was washed with brine and dried with anhydrous Na<sub>2</sub>SO<sub>4</sub>. The solvent was distilled using rotary evaporator and the product **S23** was obtained by flash column chromatography eluted with PE/EA = 5/1.

To a solution of **S23** (9.2 mmol, 1.0 equiv) in DCM (35 mL) was added PPh<sub>3</sub> (13.8 mmol, 1.5 equiv). This reaction was cooled to 0 °C and CBr<sub>4</sub> (13.8 mmol, 1.5 equiv) was added. The reaction mixture was stirred for 30 min at room temperature, and monitored by TLC. After the **S23** was completely consumed, diluted with EtOAc and washed with brine and water. The organic layer was dried over Na<sub>2</sub>SO<sub>4</sub> and concentrated. The crude product was purified using column chromatography on silica gel (PE/EA = 100:1) to give **S24**.

Under N<sub>2</sub> atmosphere, *i*PrMgCl (21.2 mmol, 4.0 equiv) was added dropwise into the suspension of (trimethylsilyl)acetylene (21.2 mmol, 4.0 equiv) in anhydrous THF (25 mL) at 0 °C. The reaction mixture was stirred for 30 min and **S24** (5.3 mmol, 1.0 equiv) dissolved in anhydrous THF (4 mL) was added into the reaction dropwise. Then the reaction mixture was stirred for 10 min at the reaction temperature and copper(I) iodide (2.12 mmol, 0.4 equiv) was added into the reaction. After the reaction temperature raised to 80 °C and maintained until the entire consumption of **S24**. And then the reaction was quenched using 5 mL saturated NH<sub>4</sub>Cl (aq), and extracted with EtOAc (2×20 mL). The organic phase was washed with brine and dried with anhydrous Na<sub>2</sub>SO<sub>4</sub>, the solvent was removed by rotary evaporator. The resulting residue was purified by chromatography (SiO<sub>2</sub>, PE) to yield **S25**.

To a solution of **S25** (3.6 mmol, 1.0 equiv) in methanol (10 mL) was added dried potassium carbonate (10.8 mmol, 3.0 equiv) at 0 °C. After 2 h stirring the reaction was diluted with EtOAc washed with brine twice. The combined organic layers were dried over MgSO<sub>4</sub> and purified then by column chromatography on silica gel (PE) to give **S26**.

Under N<sub>2</sub> atmosphere, *n*-BuLi (3.12 mmol, 1.2 equiv, 1.6 M) in hexane was added dropwise into the suspension of **S26** (2.6 mmol, 1.0 equiv) in anhydrous THF (15 mL) at -78 °C. The reaction mixture was stirred for 1 h. After the (CH<sub>2</sub>O)<sub>*n*</sub> (4 mmol, 1.5 equiv) dissolved in anhydrous THF (4 mL) was added into the reaction dropwise, the reaction temperature was

raised to room temperature and maintained until the entire consumption of **S26**. And then the reaction was quenched using 5 mL saturated  $\text{NH}_4\text{Cl}$  (aq), and extracted with EtOAc ( $2 \times 20$  mL). The organic phase was washed with brine and dried with anhydrous  $\text{Na}_2\text{SO}_4$ , the solvent was removed by rotary evaporator. The resulting residue was purified by chromatography ( $\text{SiO}_2$ , PE/EtA = 10:1) to yield **S27**.

To the solution of **S27** (2mmol, 1.0 equiv) in 10 mL DCM, 1H-imidazole (2.4 mmol, 1.2 equiv), TBSCl (2.4 mmol, 1.2 equiv) was added and the mixture was stirred at room temperature for about 1 h. After the complete consumption of **S27** determined by TLC. And then the reaction was quenched using 10 mL saturated  $\text{NH}_4\text{Cl}$  (aq), and extracted with DCM ( $2 \times 20$  mL). The organic phase was washed with brine and dried with anhydrous  $\text{Na}_2\text{SO}_4$ , the solvent was removed by rotary evaporator. The resulting residue was purified by chromatography ( $\text{SiO}_2$ , PE/EA = 50/1) to yield **3q**.

#### Tert-butyldimethyl((4-(2-(prop-1-en-2-yl)phenyl)but-2-yn-1-yl)oxy)silane (**3q**)

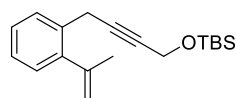

Colorless liquid, purified by chromatography (PE/EA = 50/1,  $R_f$  = 0.5);  $^1\text{H}$  NMR (400 MHz, Chloroform-*d*)  $\delta$  7.54 – 7.48 (m, 1H), 7.27 – 7.17 (m, 2H), 7.12 (dd,  $J$  = 7.2, 1.8 Hz, 1H), 5.23 (t,  $J$  = 1.8 Hz, 1H), 4.88 (dd,  $J$  = 2.1, 1.0 Hz, 1H), 4.35 (t,  $J$  = 2.3 Hz, 2H), 3.62 (t,  $J$  = 2.3 Hz, 2H), 2.05 (d,  $J$  = 1.3 Hz, 3H), 0.91 (s, 9H), 0.11 (s, 6H).  $^{13}\text{C}$  NMR (101 MHz, Chloroform-*d*)  $\delta$  144.8, 143.1, 133.3, 128.9, 127.9, 127.1, 126.5, 115.4, 83.5, 80.6, 52.1, 25.9, 24.8, 22.9, 18.3, -5.1. HRMS (ESI)  $[\text{M}+\text{H}]^+$  calculated for  $\text{C}_{19}\text{H}_{29}\text{OSi}^+$ : 301.1982, found 301.1989.

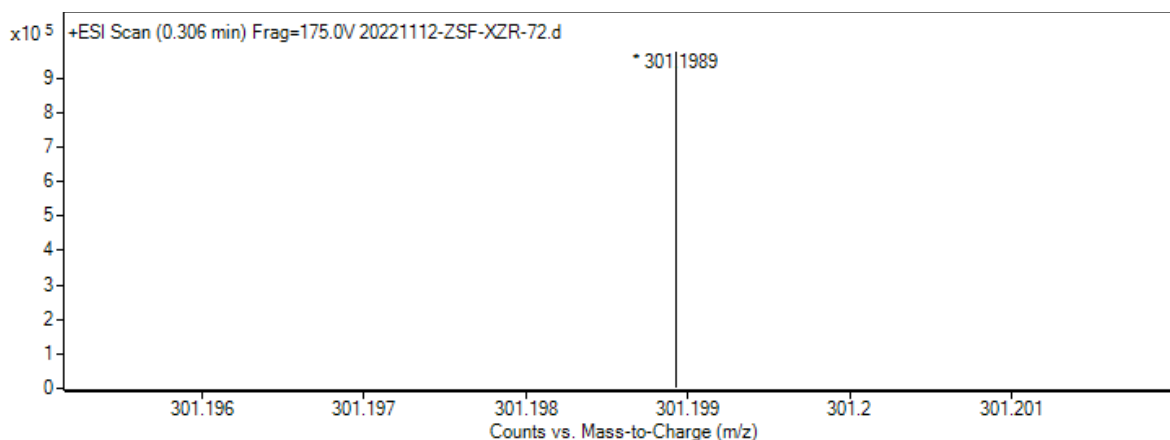

### Typical procedure G<sup>[6]</sup>:

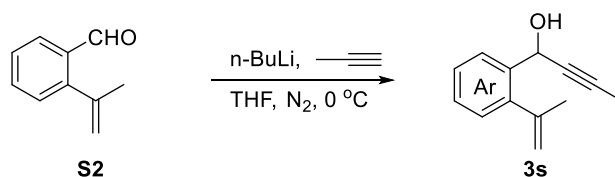

Under N<sub>2</sub> atmosphere, the solution of n-BuLi (2.4 mmol, 1.2 equiv) in hexane (1.6 mol/L) was added dropwise into the solution of prop-1-yne (2.4 mmol, 1.2 equiv) in anhydrous THF at -78°C. After the 30 min, aldehyde **S2** (2 mmol, 1.0 equiv) dissolved in anhydrous THF was added and the temperature was allowed to raise to room temperature. After the complete consumption of **S2** (determined by TLC), the reaction was quenched by saturated NH<sub>4</sub>Cl (aq), and extracted with EtOAc. The organic phase was washed with brine and dried with anhydrous Na<sub>2</sub>SO<sub>4</sub>, the solvent was removed by rotary evaporator. The resulting residue was flash chromatography (PE:EA = 5:1) on silica gel to afford the product **3s**.

#### 1-(2-(prop-1-en-2-yl)phenyl)but-2-yn-1-ol (**3s**)

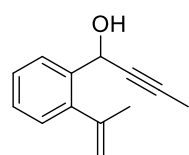

Yellow liquid, purified by chromatography (PE/EA = 5/1, R<sub>f</sub> = 0.5); <sup>1</sup>H NMR (400 MHz, Chloroform-*d*) δ 6.48 (dd, *J* = 7.5, 1.7 Hz, 1H), 6.09 – 5.96 (m, 2H), 5.88 (dd, *J* = 7.4, 1.7 Hz, 1H), 4.37 (d, *J* = 2.3 Hz, 1H), 4.00 (s, 1H), 3.69 (dd, *J* = 2.2, 1.1 Hz, 1H), 1.08 (s, 1H), 0.83 (t, *J* = 1.3 Hz, 3H), 0.60 (d, *J* = 2.2 Hz, 3H). <sup>13</sup>C NMR (101 MHz, Chloroform-*d*) δ 144.3, 142.5, 138.2, 128.0, 128.0, 127.5, 127.1, 116.1, 82.6,

80.1, 61.9, 25.5, 3.8.

### Typical procedure H:

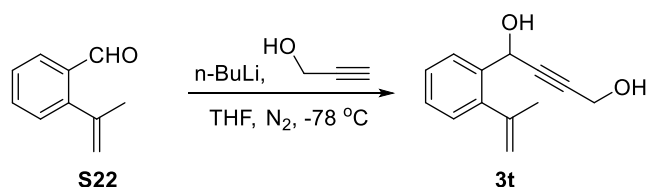

Under N<sub>2</sub> atmosphere, the solution of n-BuLi (4.2 mmol, 2.1 equiv) in hexane (1.6 mol/L) was added dropwise into the solution of prop-2-yn-1-ol (2.2 mmol, 1.1 equiv) in anhydrous THF at -78°C. After the 30 min, aldehyde **S22** (2 mmol, 1.0 equiv) dissolved in anhydrous THF was added and the temperature was allowed to raise to room temperature. After the complete consumption of **S22** (determined by TLC), the reaction was quenched by saturated NH<sub>4</sub>Cl (aq) and extracted with EtOAc. The organic phase was washed with brine and dried with anhydrous Na<sub>2</sub>SO<sub>4</sub>, the solvent was removed by rotary evaporator. The resulting residue was flash chromatography (PE/EA = 2:1) on silica gel to afford the product **3t**.

#### 1-(2-(prop-1-en-2-yl)phenyl)but-2-yn-1,4-diol (**3t**)

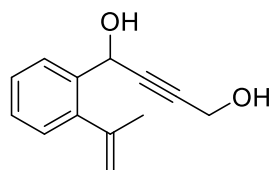

Colorless solid, purified by chromatography (PE/EA = 2/1, R<sub>f</sub> = 0.5); <sup>1</sup>H NMR (400 MHz, Chloroform-*d*) δ 6.93 – 6.78 (m, 1H), 6.44 (t, *J* = 4.7 Hz, 2H), 6.35 – 6.20 (m, 1H), 4.86 (s, 1H), 4.41 (s, 1H), 4.09 (s, 1H), 3.42 (s, 2H), 2.16 (s, 1H), 1.79 (s, 2H), 1.23 (s, 3H). <sup>13</sup>C NMR (101 MHz, Chloroform-*d*) δ 144.0, 142.6, 137.3, 128.3, 128.0, 127.6, 127.2, 116.3, 86.3, 84.5,

61.5, 51.0, 25.4. HRMS (ESI) [M+Na]<sup>+</sup> calculated for C<sub>13</sub>H<sub>14</sub>O<sub>2</sub>Na<sup>+</sup>: 225.0886, found 225.0881.

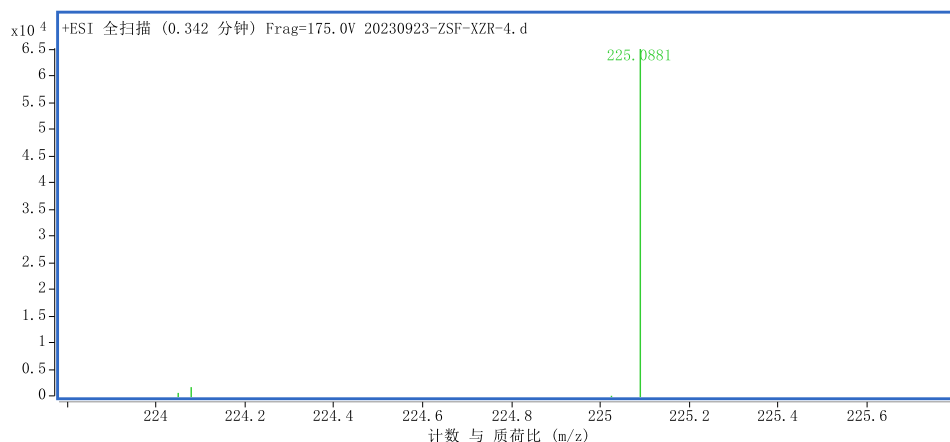

### Typical procedure I:

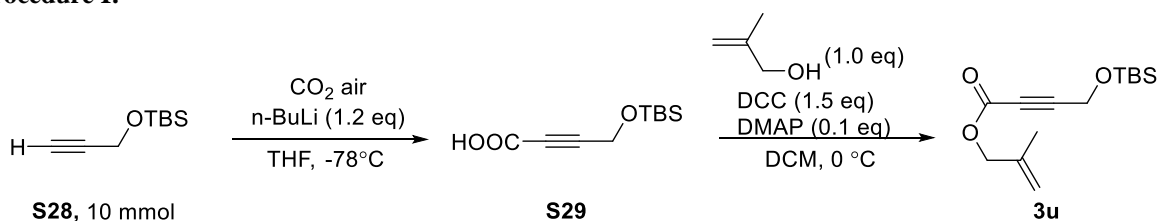

Under N<sub>2</sub> atmosphere, the solution of n-BuLi (12 mmol, 1.2 equiv) in hexane (1.6 mol/L) was added dropwise into the solution of **S28** (10 mmol, 1.0 equiv) in anhydrous THF at -78 °C. After the 30 min, dry CO<sub>2</sub> was passed through the reaction for 30 min. Then, the mixture was stirred for 30 min at -78 °C, and the temperature was allowed to raise to room temperature. After the complete consumption of **S28** (determined by TLC), the reaction was quenched by 1.0 M HCl and extracted with EtOAc. The organic phase was washed with brine and dried with anhydrous Na<sub>2</sub>SO<sub>4</sub>, the solvent was removed by rotary evaporator. The resulting residue was flash chromatography (PE/EA = 3:1) on silica gel to afford the product **S29**.

To a flame dried flask was added alcohol (2.0 mol) in DCM, then the reaction mixture was transferred to 0 °C, **S29** (1.0 eq), DCC (1.5 eq) and DMAP (0.1 eq) was added successively and the mixture was stirred for 1 hours. The insoluble salts were removed via filtration and the mixture was evaporated under reduced pressure and purified by column chromatography (PE:EA = 5:1) to the compound **3u** in 80% yield as the colorless liquid.

### 2-methylallyl 4-((tert-butyldimethylsilyl)oxy)but-2-ynoate(**3u**)

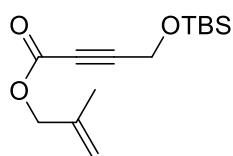

Colorless liquid, purified by chromatography (PE/EA = 5/1, R<sub>f</sub> = 0.5); <sup>1</sup>H NMR (400 MHz, Chloroform-*d*) δ 5.03 (q, *J* = 1.2 Hz, 1H), 4.98 (q, *J* = 1.2 Hz, 1H), 4.61 (s, 2H), 4.46 (s, 2H), 1.79 (t, *J* = 1.1 Hz, 3H), 0.93 (s, 9H), 0.15 (s, 6H). <sup>13</sup>C NMR (101 MHz, Chloroform-*d*) δ 153.0, 138.9, 113.9, 86.2, 69.0, 55.8, 51.4, 34.9, 25.7, 19.4, -5.3.

### Typical procedure J:

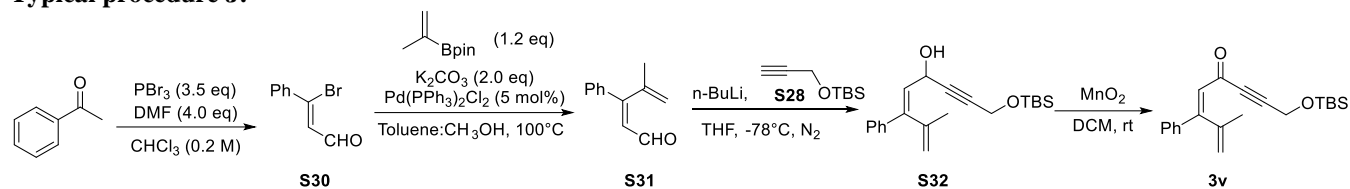

A solution of N,N-dimethylformamide (3 eq.) in anhydrous chloroform (0.5 M) was cooled to 0 °C in ice bath. Phosphorous tribromide (2.7 eq.) was added dropwise over a period of 10 min. The resulting white suspension was warmed to room temperature and stirred for an additional 30 min. A solution of carbonyl compound (100 mmol) in chloroform was added dropwise and the reaction mixture was stirred for 12 h at room temperature. The reaction mixture was then poured in ice water in ice bath. Solid NaOH was carefully added to neutralize the acids and the mixture was extracted three times with DCM. The organic part was then washed with cold water, dried with sodium sulfate and the solvents evaporated. Purification of the residue was done by silica gel by column chromatography. (PE: EA = 15: 1- 10: 1) to afford the product **S30**

Note: make sure if ice bath is needed, be careful while neutralizing the mixture (every time NaOH added, wait for about 20mins before adding it for the next time and make sure to check PH value from time to time.)

To an N<sub>2</sub>-sparged solution of **S30** (2 mmol, 1.0 equiv), alkenylboronic acid pinacol ester (2.2 mmol, 1.1 equiv) and K<sub>2</sub>CO<sub>3</sub>(3.3 mmol, 3.0 equiv) in Toluene (7 mL) and CH<sub>3</sub>OH (1 mL) was added Pd(PPh<sub>3</sub>)<sub>2</sub>Cl<sub>2</sub> (0.1 mmol, 5 mol%). The mixture was stirred at 100 °C for 12 h. After the reaction completed (monitored by GC-MS), it was diluted with water and extracted with EtOAc. The combined organics were washed with brine, dried over anhydrous Na<sub>2</sub>SO<sub>4</sub> and concentrated in vacuo. The resulting residue was flash chromatographed (PE: EA = 25:1) on silica gel to afford the product **S31**.

Under N<sub>2</sub> atmosphere, the solution of n-BuLi (1.65 mmol, 1.1 equiv) in hexane (1.6 mol/L) was added dropwise into the solution of **S28** (1.8 mmol, 1.2 equiv) in anhydrous THF at -78°C. After the 30 min, aldehyde **S31** (1.5 mmol, 1.0 equiv) dissolved in anhydrous THF was added and the temperature was allowed to raise to room temperature. After the complete consumption of **S31** (determined by TLC, about 1 h), the reaction was quenched by saturated NH<sub>4</sub>Cl (aq), and extracted with EtOAc. The organic phase was washed with brine and dried with anhydrous Na<sub>2</sub>SO<sub>4</sub>, the solvent was removed by rotary evaporator. The resulting residue was flash chromatography (PE: EA = 10:1) on silica gel to afford the product **S32**.

To the solution of **S32** (0.9 mmol, 1.0 equiv) in 10 mL DCM, activated MnO<sub>2</sub> (9 mmol, 10 equiv) was added and the mixture was stirred at room temperature for about 3 h. After the complete consumption of **S32** determined by TLC, the reaction mixture was filtered through silica gel and the filtrate was concentrated by rotary evaporator. The resulting residue was flash chromatographed (PE: EA = 20:1) on silica gel to afford the product **3v**.

### (E)-1-((tert-butyldimethylsilyl)oxy)-7-methyl-6-phenylocta-5,7-dien-2-yn-4-one (3v)

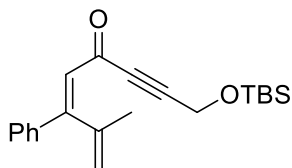

Organic liquid, purified by chromatography (PE/EA = 20/1, R<sub>f</sub> = 0.6); <sup>1</sup>H NMR (500 MHz, Chloroform-*d*) δ 7.30 (td, *J* = 4.6, 2.3 Hz, 3H), 7.12 (dd, *J* = 7.4, 2.0 Hz, 2H), 6.30 (s, 1H), 5.40 (dd, *J* = 2.2, 1.2 Hz, 1H), 4.91 (d, *J* = 1.5 Hz, 1H), 3.94 (s, 2H), 2.01 (d, *J* = 1.3 Hz, 3H), 0.81 (s, 9H), 0.00 (s, 6H). <sup>13</sup>C NMR (126 MHz, Chloroform-*d*) δ 177.8, 157.2, 144.1, 137.3, 129.8, 128.2, 127.7, 126.8, 125.6, 92.7, 84.0, 51.3, 25.7, 20.5, 18.2, -5.2.

### Procedure for formation of 6:

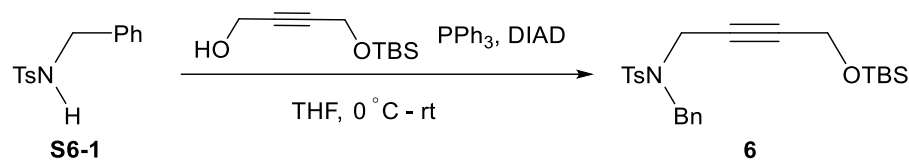

To a flame dried flask was added PPh<sub>3</sub> (1.3 eq) in dry THF, 4-((tert-butyldimethylsilyloxy)but-2-yn-1-ol) (1.0 eq) and **S6-1** (1.05 eq) under nitrogen, then the reaction mixture was transferred to 0 °C, DIAD (1.3 eq) was added dropwise and the mixture was moved to room temperature, stirred for 4 hours. The mixture was evaporated under reduced pressure and purified by column chromatography (PE:EA = 10:1) to the compound **6** in 94% yield as the yellow oil.

### N-benzyl-N-(4-((tert-butyldimethylsilyloxy)but-2-yn-1-yl)-4-methylbenzenesulfonamide(6)

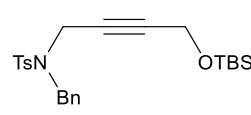

Yellow oil, 94%, purified by chromatography (PE/EA = 10/1, R<sub>f</sub> = 0.7); <sup>1</sup>H NMR (500 MHz, Chloroform-*d*) δ 7.87 (d, *J* = 1.9 Hz, 0H), 7.86 (d, *J* = 1.8 Hz, 0H), 4.41 (s, 0H), 4.10 (t, *J* = 1.9 Hz, 0H), 4.04 (t, *J* = 2.0 Hz, 0H), 2.50 (s, 0H), 0.96 (s, 2H), 0.12 (s, 1H). <sup>13</sup>C NMR (126 MHz, Chloroform-*d*) δ 143.5, 136.2, 135.1, 129.5, 128.8, 128.7, 128.1, 127.9, 84.7, 77.1, 51.4, 49.9, 36.0, 25.8, 21.6, 18.2, -5.2. HRMS (ESI) [M+Na]<sup>+</sup> calculated for C<sub>24</sub>H<sub>33</sub>NO<sub>3</sub>SSiNa<sup>+</sup>: 466.1848, found 466.1854.

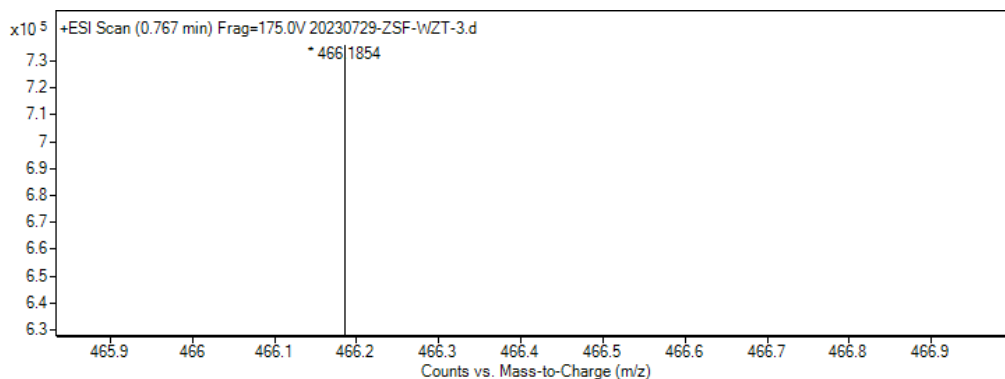



## 4. General procedure for Rh-catalyzed reactions

### General procedure for 5-*exo*-cycloisomerization of 1,6-enynes

To a dichloromethane solution of **1** or **3** (0.1 mmol, 1.0 mL) in Schlenk tube with a magnetic bar was added Rh<sub>2</sub>(OPiv)<sub>4</sub> (0.002 mmol, 2 mol%, 1.3 mg) at 30 °C under N<sub>2</sub>. The sealed tube was then stirred at 30 °C under nitrogen atmosphere for 48 h. The mixture was then concentrated and the residue was purified by chromatography on silica gel (eluent: ethyl acetate/petroleum ether) to afford the desired product **2** or **4**.

### General procedure for asymmetric 5-*exo*-cycloisomerization of 1,6-enynes

To a dichloromethane solution of **1** or **3** (0.05 mmol, 0.5 mL) in Schlenk tube with a magnetic bar was added Rh<sub>2</sub>(S-TCPTTL)<sub>4</sub> (0.001 mmol, 2 mol%, 2 mg), the catalyst was dissolved in dichloromethane) at 30 °C under N<sub>2</sub>. The sealed tube was then stirred at 30 °C under nitrogen atmosphere for 48 h. The mixture was then concentrated and the residue was purified by chromatography on silica gel (eluent: ethyl acetate/petroleum ether) to afford the desired product **2** or **4**.

### (1aR,6aS)-6a-((Z)-2-((tert-butyldimethylsilyloxy)vinyl)-1a-methyl-1a,6a-dihydrocyclopropa[a]inden-6(1H)-one (**2d**)

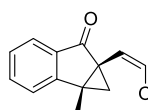

Yellow liquid, 13.2 mg, 84%, 93% ee, purified by chromatography (PE/EA = 20/1, R<sub>f</sub> = 0.4); <sup>1</sup>H NMR (500 MHz, Chloroform-*d*) δ 7.62 (d, *J* = 7.5 Hz, 1H), 7.46 (t, *J* = 7.4 Hz, 1H), 7.39 (d, *J* = 7.5 Hz, 1H), 7.24 (dd, *J* = 14.7, 7.3 Hz, 1H), 6.56 (d, *J* = 5.4 Hz, 1H), 4.62 (d, *J* = 5.5 Hz, 1H), 1.73 (d, *J* = 3.9 Hz, 1H), 1.67 (d, *J* = 4.0 Hz, 1H), 1.57 (s, 3H), 0.70 (s, 9H), 0.08 (s, 3H), 0.05 (s, 3H). <sup>13</sup>C NMR (126 MHz, Chloroform-*d*) δ 203.0, 157.4, 144.2, 133.4, 126.5, 124.5, 122.2, 101.0, 44.2, 40.4, 34.3, 25.2, 17.7, 13.1, -5.4, -5.5. HRMS (ESI) [M+H]<sup>+</sup> calculated for C<sub>19</sub>H<sub>27</sub>O<sub>2</sub>Si<sup>+</sup>: 315.1775, found 315.1781.

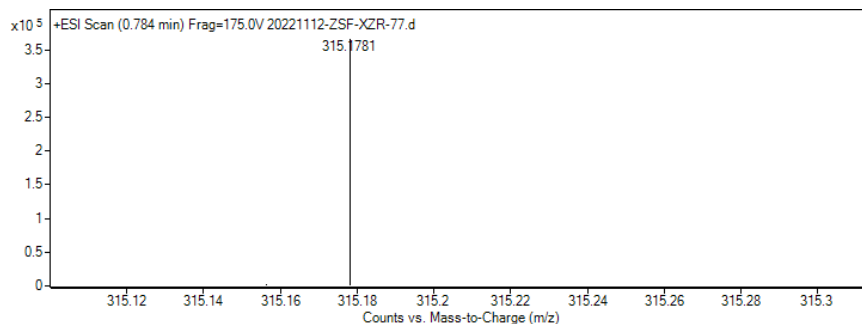

Resolution of enantiomers: DAICEL Chiralcel<sup>®</sup> ODH column, 2% IPA-Hexanes, 1.0 mL/min, 254 nm, RT<sub>1</sub> = 4.7 min, RT<sub>2</sub> = 5.5 min. [α]<sub>D</sub><sup>25</sup> = +28.1 (c 0.5, CH<sub>2</sub>Cl<sub>2</sub>).

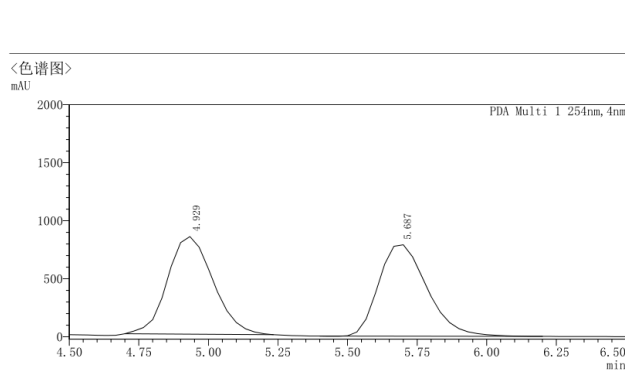

<峰表>

| 峰号 | 保留时间  | 面积       | 高度      | 化合物名 | 高度%     | 面积%     |
|----|-------|----------|---------|------|---------|---------|
| 1  | 4.929 | 9552121  | 840476  |      | 51.604  | 50.057  |
| 2  | 5.687 | 9530300  | 788241  |      | 48.396  | 49.943  |
| 总计 |       | 19082421 | 1628717 |      | 100.000 | 100.000 |

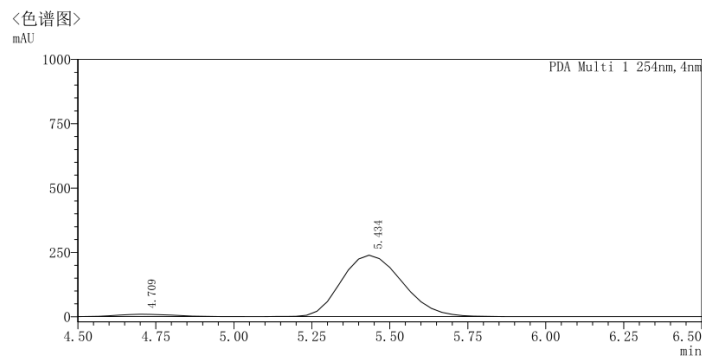

<峰表>

| 峰号 | 保留时间  | 面积      | 高度     | 化合物名 | 高度%     | 面积%     |
|----|-------|---------|--------|------|---------|---------|
| 1  | 4.709 | 116472  | 9160   |      | 3.699   | 3.459   |
| 2  | 5.434 | 3250640 | 238503 |      | 96.301  | 96.541  |
| 总计 |       | 3367111 | 247664 |      | 100.000 | 100.000 |

**(1aR,6aS)-6a-((Z)-2-((tert-butyl-diphenylsilyloxy)vinyl)-1a-methyl-1a,6a-dihydrocyclopropa[a]inden-6(1H)-one (2e)**

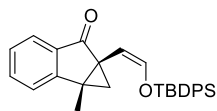

Yellow liquid, 7.0 mg, 32%, 74% ee, purified by chromatography (PE/EA = 20/1, R<sub>f</sub> = 0.4); <sup>1</sup>H NMR

(500 MHz, Chloroform-*d*) δ 7.66 (dd, *J* = 15.4, 7.3 Hz, 3H), 7.56 (d, *J* = 7.3 Hz, 2H), 7.50 (t, *J* = 7.4 Hz, 1H), 7.47 – 7.35 (m, 5H), 7.34 – 7.24 (m, 3H), 6.52 (dd, *J* = 5.5, 1.5 Hz, 1H), 4.65 (d, *J* = 5.5 Hz,

1H), 1.83 (d, *J* = 4.0 Hz, 1H), 1.66 (s, 3H), 1.62 (d, *J* = 4.6 Hz, 1H), 0.88 – 0.73 (m, 9H). <sup>13</sup>C NMR (126 MHz, Chloroform-*d*) δ 202.7, 157.3, 145.0, 135.5, 135.3, 133.5, 132.5, 132.1, 130.0, 129.9, 127.9, 127.8, 126.7, 124.7, 122.4, 101.5, 44.4, 40.3, 34.4, 26.1, 18.9, 13.4. **HRMS** (ESI) [M+Na]<sup>+</sup> calculated for C<sub>29</sub>H<sub>30</sub>O<sub>2</sub>SiNa<sup>+</sup>: 461.1907, found 461.1909.

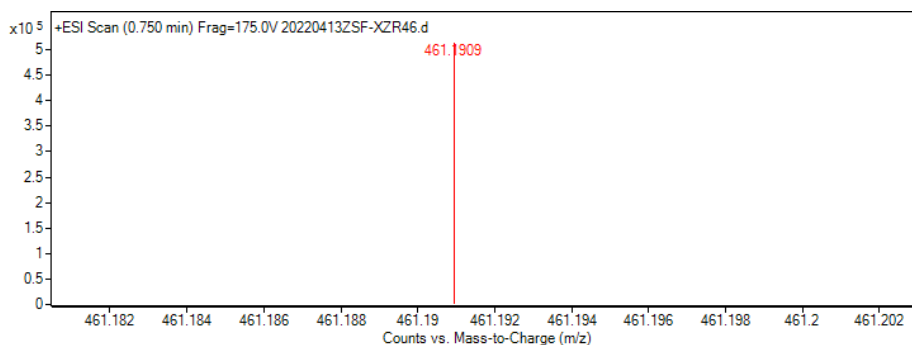

Resolution of enantiomers: DAICEL Chiralcel<sup>®</sup> ODH column, 2% IPA-Hexanes, 1.0 mL/min, 254 nm, RT<sub>1</sub> = 5.1 min, RT<sub>2</sub> = 6.7 min. [α]<sub>D</sub><sup>25</sup> = +32.1 (c 0.5, CH<sub>2</sub>Cl<sub>2</sub>)

<色谱图>

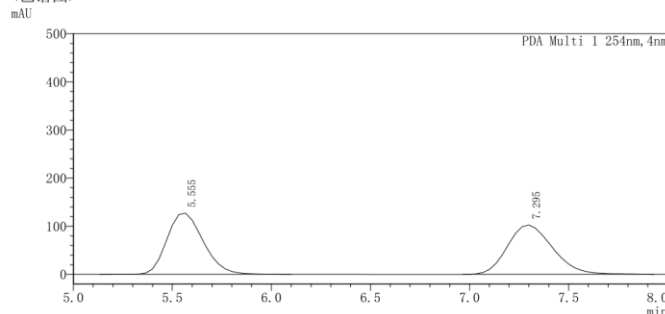

<峰表>

| 峰号 | 保留时间  | 面积      | 高度     | 化合物名 | 高度%     | 面积%     |
|----|-------|---------|--------|------|---------|---------|
| 1  | 5.555 | 1613470 | 127035 |      | 55.326  | 49.875  |
| 2  | 7.295 | 1621564 | 102575 |      | 44.674  | 50.125  |
| 总计 |       | 3235034 | 229610 |      | 100.000 | 100.000 |

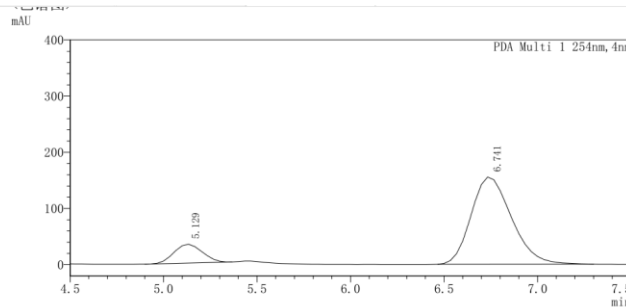

<峰表>

| 峰号 | 保留时间  | 面积      | 高度     | 化合物名 | 高度%     | 面积%     |
|----|-------|---------|--------|------|---------|---------|
| 1  | 5.129 | 356294  | 33435  |      | 17.725  | 13.240  |
| 2  | 6.741 | 2334693 | 155200 |      | 82.275  | 86.760  |
| 总计 |       | 2690987 | 188635 |      | 100.000 | 100.000 |

**(1aR,6aS)-1a-methyl-6a-((Z)-2-((triisopropylsilyloxy)vinyl)-1a,6a-dihydrocyclopropa[a]inden-6(1H)-one (2f)**

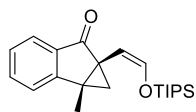

Yellow liquid, 9.3 mg, 52%, 83% ee, purified by chromatography (PE/EA = 20/1, R<sub>f</sub> = 0.4); <sup>1</sup>H NMR

(500 MHz, Chloroform-*d*) δ 7.62 (dt, *J* = 7.5, 1.0 Hz, 1H), 7.50 – 7.35 (m, 2H), 7.29 – 7.17 (m, 1H), 6.65 (d, *J* = 5.6 Hz, 1H), 4.57 (d, *J* = 5.6 Hz, 1H), 1.73 (d, *J* = 4.0 Hz, 1H), 1.64 (d, *J* = 4.1 Hz, 1H), 1.59 (s,

3H), 1.09 – 1.01 (m, 3H), 0.94 (dd, *J* = 7.4, 2.5 Hz, 18H). <sup>13</sup>C NMR (126 MHz, Chloroform-*d*) δ 202.8, 157.4, 144.9, 133.5, 133.3, 126.5, 124.5, 122.2, 100.2, 44.2, 40.3, 34.3, 17.5, 13.2, 11.7. **HRMS** (ESI) [M+Na]<sup>+</sup> calculated for C<sub>22</sub>H<sub>32</sub>O<sub>2</sub>SiNa<sup>+</sup>: 379.2064, found 379.2068.

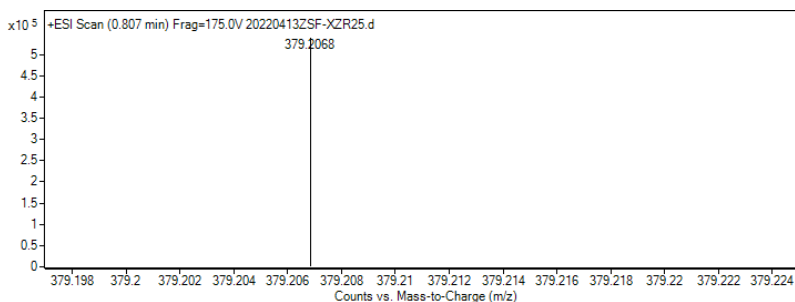

Resolution of enantiomers: DAICEL Chiralcel® ODH column, 2% IPA-Hexanes, 1.0 mL/min, 254 nm, RT<sub>1</sub> = 4.6 min, RT<sub>2</sub> = 5.0 min.  $[\alpha]_D^{25} = -15.4$  (c 0.5, CH<sub>2</sub>Cl<sub>2</sub>)

<色谱图>

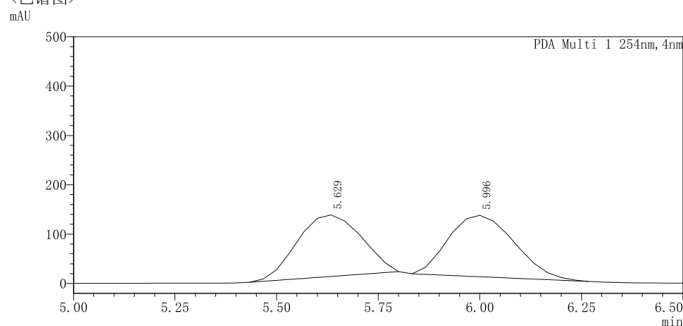

<峰表>

| 峰号 | 保留时间  | 面积      | 高度     | 化合物名 | 高度%     | 面积%     |
|----|-------|---------|--------|------|---------|---------|
| 1  | 5.629 | 1393381 | 125007 |      | 50.072  | 49.931  |
| 2  | 5.996 | 1397213 | 124647 |      | 49.928  | 50.069  |
| 总计 |       | 2790594 | 249653 |      | 100.000 | 100.000 |

<色谱图>

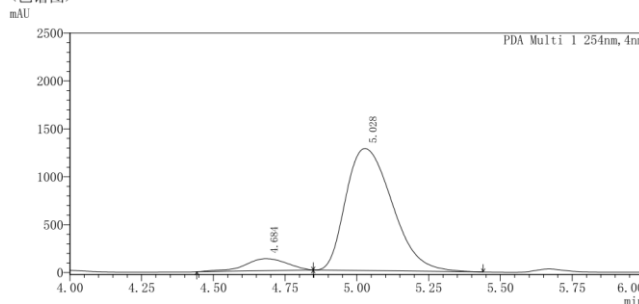

<峰表>

| 峰号 | 保留时间  | 面积       | 高度      | 化合物名 | 高度%     | 面积%     |
|----|-------|----------|---------|------|---------|---------|
| 1  | 4.684 | 1271200  | 125491  |      | 8.962   | 8.141   |
| 2  | 5.028 | 14344112 | 1274700 |      | 91.038  | 91.859  |
| 总计 |       | 15615312 | 1400191 |      | 100.000 | 100.000 |

**(1aR,6aS)-6a-((Z)-2-((tert-butyldimethylsilyloxy)vinyl)-4-fluoro-1a-methyl-1a,6a-dihydrocyclopropa[a]inden-6 (1H)-one (2g)**

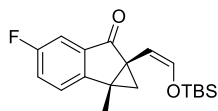

Yellow solid, M.P: 64-67°C, 16.2 mg, 98%, 94% ee, purified by chromatography (PE/EA = 15/1, R<sub>f</sub> =

0.4); <sup>1</sup>H NMR (500 MHz, Chloroform-*d*) δ 7.35 (dd, *J* = 8.3, 4.4 Hz, 1H), 7.28 (dd, *J* = 9.9, 2.2 Hz, 1H), 7.16 (td, *J* = 8.6, 2.6 Hz, 1H), 6.56 (d, *J* = 5.6 Hz, 1H), 4.61 (d, *J* = 5.6 Hz, 1H), 1.73 (d, *J* = 4.1

Hz, 1H), 1.62 (d, *J* = 4.0 Hz, 1H), 1.55 (s, 3H), 0.71 (s, 9H), 0.08 (s, 3H), 0.05 (s, 3H). <sup>13</sup>C NMR (126 MHz, Chloroform-*d*) δ 201.7, 161.9 (d, *J* = 246.1 Hz), 152.8 (d, *J* = 2.3 Hz), 144.4, 135.4 (d, *J* = 7.0 Hz), 123.5 (d, *J* = 7.9 Hz), 120.3 (d, *J* = 23.4 Hz), 110.9 (d, *J* = 22.5 Hz), 100.8, 44.3, 40.9, 33.9, 25.2, 17.7, 13.1, -5.4, -5.5. <sup>19</sup>F NMR (471 MHz, Chloroform-*d*) δ -115.74.

**HRMS** (ESI) [M+Na]<sup>+</sup> calculated for C<sub>19</sub>H<sub>25</sub>FO<sub>2</sub>SiNa<sup>+</sup>: 355.1500, found 355.1507.

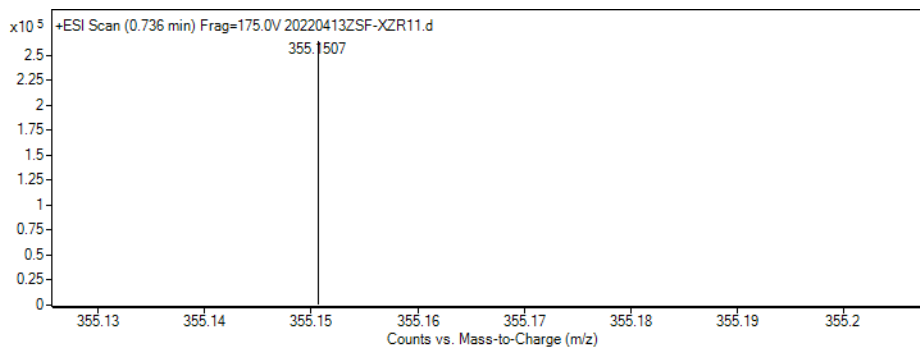

Resolution of enantiomers: DAICEL Chiralcel® ODH column, 2% IPA-Hexanes, 0.5 mL/min, 254 nm, RT<sub>1</sub> = 8.6 min, RT<sub>2</sub> = 9.1min.  $[\alpha]_D^{25} = -7.3$  (c 0.5, CH<sub>2</sub>Cl<sub>2</sub>).

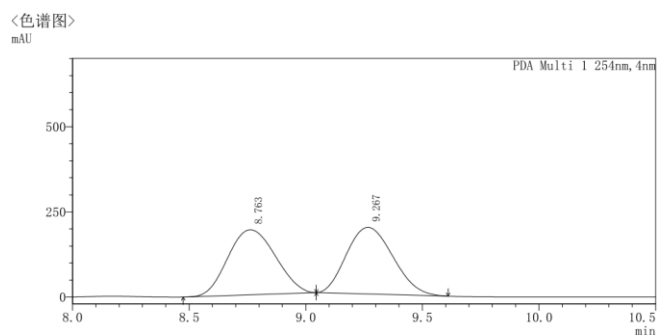

<峰表>

| 峰号 | 保留时间  | 面积      | 高度     | 化合物名 | 高度%     | 面积%     |
|----|-------|---------|--------|------|---------|---------|
| 1  | 8.763 | 2708439 | 191010 |      | 49.420  | 49.972  |
| 2  | 9.267 | 2711513 | 195496 |      | 50.580  | 50.028  |
| 总计 |       | 5419952 | 386505 |      | 100.000 | 100.000 |

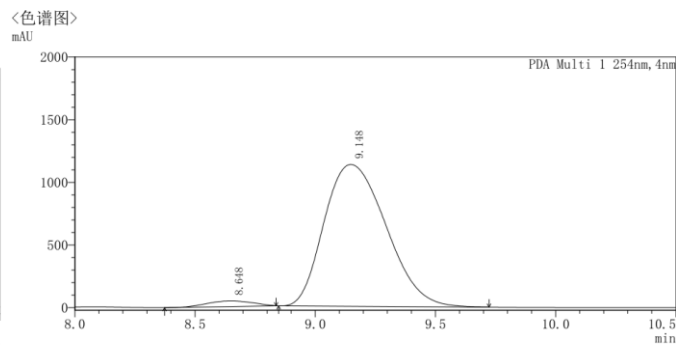

<峰表>

| 峰号 | 保留时间  | 面积       | 高度      | 化合物名 | 高度%     | 面积%     |
|----|-------|----------|---------|------|---------|---------|
| 1  | 8.648 | 585149   | 44008   |      | 3.743   | 2.801   |
| 2  | 9.148 | 20303663 | 1131764 |      | 96.257  | 97.199  |
| 总计 |       | 20888812 | 1175772 |      | 100.000 | 100.000 |

**(1aR,6aS)-6a-((Z)-2-((tert-butyldimethylsilyl)oxy)vinyl)-4-chloro-1a-methyl-1a,6a-dihydrocyclopropa[a]inden-6(1H)-one (2h)**

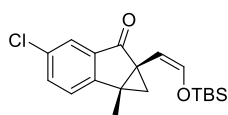

Yellow solid, M.P: 74-76 °C, 12.5 mg, 72%, 94% ee, purified by chromatography (PE/EA = 20/1, R<sub>f</sub> = 0.4); <sup>1</sup>H NMR (500 MHz, Chloroform-*d*) δ 7.58 (d, *J* = 2.1 Hz, 1H), 7.42 (dd, *J* = 8.0, 2.1 Hz, 1H), 7.33 (d, *J* = 8.0 Hz, 1H), 6.56 (d, *J* = 5.5 Hz, 1H), 4.60 (d, *J* = 5.6 Hz, 1H), 1.72 (d, *J* = 4.2 Hz, 1H), 1.65 (d, *J* = 4.2 Hz, 1H), 1.55 (s, 3H), 0.71 (s, 9H), 0.08 (s, 3H), 0.06 (s, 3H). <sup>13</sup>C NMR (126 MHz, Chloroform-*d*) δ 201.5, 155.5, 144.5, 135.1, 133.2, 132.6, 124.5, 123.5, 100.6, 44.0, 40.9, 34.1, 25.2, 17.7, 13.0, -5.4, -5.5. HRMS (ESI) [M+Na]<sup>+</sup> calculated for C<sub>19</sub>H<sub>25</sub>ClO<sub>2</sub>SiNa<sup>+</sup>: 371.1204, found 371.1210.

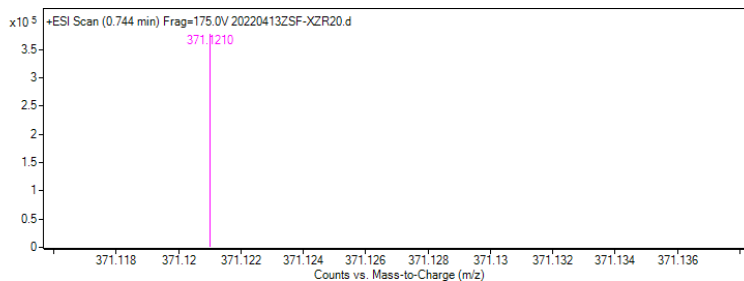

Resolution of enantiomers: Phenomenex INC column, 2% IPA-Hexanes, 0.8 mL/min, 254 nm, RT<sub>1</sub> = 7.1 min, RT<sub>2</sub> = 7.6 min.  $[\alpha]_D^{25} = +65.1$  (c 0.5, CH<sub>2</sub>Cl<sub>2</sub>).

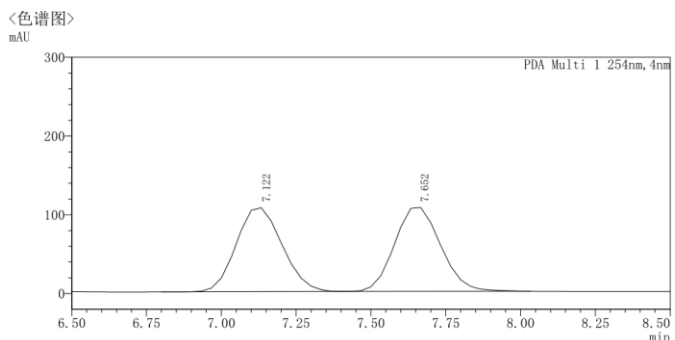

<峰表>

| 峰号 | 保留时间  | 面积      | 高度     | 化合物名 | 高度%     | 面积%     |
|----|-------|---------|--------|------|---------|---------|
| 1  | 7.122 | 1141937 | 106786 |      | 50.042  | 49.892  |
| 2  | 7.652 | 1146877 | 106606 |      | 49.958  | 50.108  |
| 总计 |       | 2288814 | 213392 |      | 100.000 | 100.000 |

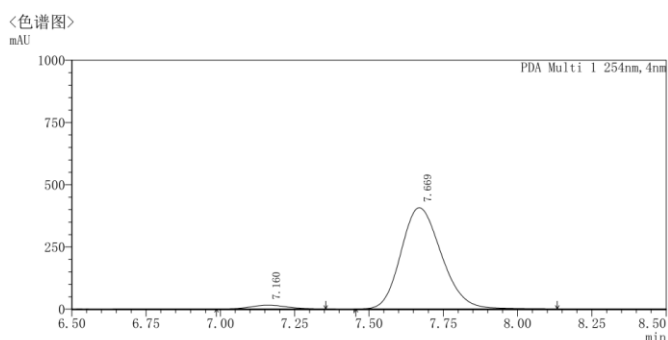

<峰表>

| 峰号 | 保留时间  | 面积      | 高度     | 化合物名 | 高度%     | 面积%     |
|----|-------|---------|--------|------|---------|---------|
| 1  | 7.160 | 123455  | 14979  |      | 3.552   | 3.112   |
| 2  | 7.669 | 3843876 | 406690 |      | 96.448  | 96.888  |
| 总计 |       | 3967331 | 421669 |      | 100.000 | 100.000 |

(1*a*R,6*a*S)-6*a*-((*Z*)-2-((*tert*-butyldimethylsilyloxy)viny)-1*a*-methyl-4-(trifluoromethyl)-1*a*,6*a*-dihydrocyclopropa [a]inden-6(1*H*)-one (2i)

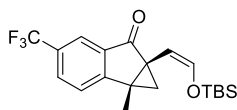

Yellow solid, M.P: 63-64°C, 11.8 mg, 62%, 90% ee, purified by chromatography (PE/EA = 10/1, R<sub>f</sub>

= 0.4); <sup>1</sup>H NMR (500 MHz, Chloroform-*d*) δ 7.89 (d, *J* = 1.8 Hz, 1H), 7.72 (dd, *J* = 8.0, 1.8 Hz, 1H), 7.52 (d, *J* = 7.9 Hz, 1H), 6.58 (d, *J* = 5.5 Hz, 1H), 4.63 (d, *J* = 5.5 Hz, 1H), 1.78 (d, *J* = 4.3 Hz, 1H),

1.69 (d, *J* = 4.3 Hz, 1H), 1.59 (s, 3H), 0.68 (s, 9H), 0.08 (s, 3H), 0.05 (s, 3H). <sup>13</sup>C NMR (126 MHz, Chloroform-*d*) δ 201.30, 160.59, 144.78, 133.97, 130.10 (q, *J* = 3.7 Hz), 129.30 (q, *J* = 32.7 Hz), 122.83 (q, *J* = 272.5 Hz), 122.82, 121.70 (q, *J* = 3.8 Hz), 100.3, 43.8, 41.3, 34.4, 25.1, 17.6, 12.9, -5.4, -5.5. <sup>19</sup>F NMR (471 MHz, Chloroform-*d*) δ -62.37. HRMS (ESI) [M+Na]<sup>+</sup> calculated for C<sub>20</sub>H<sub>25</sub>F<sub>3</sub>O<sub>2</sub>SiNa<sup>+</sup>: 405.1468, found 405.1471.

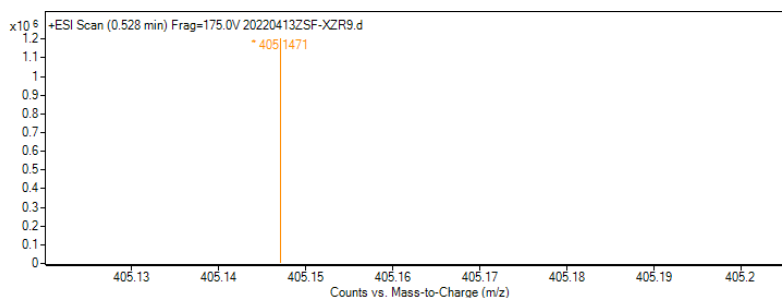

Resolution of enantiomers: Phenomenex INA column, 2% IPA-Hexanes, 1.0 mL/min, 254 nm, RT<sub>1</sub> = 4.3 min, RT<sub>2</sub> = 4.8 min.

[α]<sub>D</sub><sup>25</sup> = + 64.0 (c 0.5, CH<sub>2</sub>Cl<sub>2</sub>).

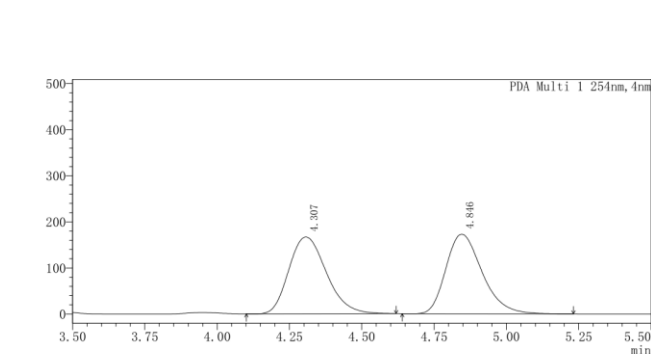

<峰表>

| 峰号 | 保留时间  | 面积      | 高度     | 化合物名 | 高度%     | 面积%     |
|----|-------|---------|--------|------|---------|---------|
| 1  | 4.307 | 1505376 | 166547 |      | 49.119  | 49.959  |
| 2  | 4.846 | 1507853 | 172518 |      | 50.881  | 50.041  |
| 总计 |       | 3013229 | 339065 |      | 100.000 | 100.000 |

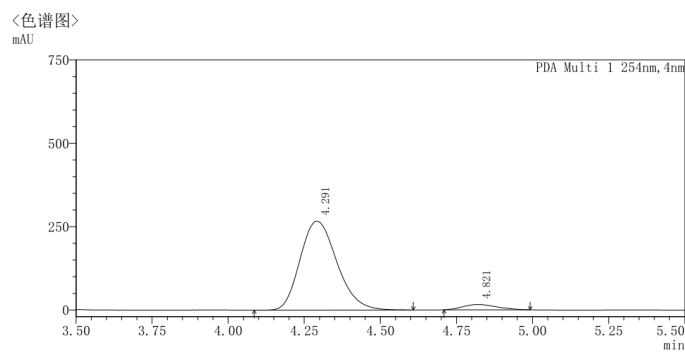

<峰表>

| 峰号 | 保留时间  | 面积      | 高度     | 化合物名 | 高度%     | 面积%     |
|----|-------|---------|--------|------|---------|---------|
| 1  | 4.291 | 2250569 | 267081 |      | 94.400  | 94.818  |
| 2  | 4.821 | 122995  | 15844  |      | 5.600   | 5.182   |
| 总计 |       | 2373564 | 282925 |      | 100.000 | 100.000 |

(1aR,6aS)-6a-((Z)-2-((tert-butyldimethylsilyl)oxy)vinyl)-1a-methyl-4-nitro-1a,6a-dihydrocyclopropa[a]inden-6(1H)-one (2j)

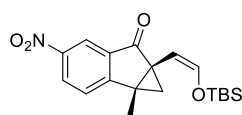

Yellow solid, M.P: 87-88°C, 11.5 mg, 64%, 96% ee, purified by chromatography (PE/EA = 5/1, Rf =

0.4); <sup>1</sup>H NMR (500 MHz, Chloroform-*d*) δ 8.45 (d, *J* = 2.2 Hz, 1H), 8.36 (dd, *J* = 8.3, 2.2 Hz, 1H),

7.56 (d, *J* = 8.3 Hz, 1H), 6.60 (d, *J* = 5.5 Hz, 1H), 4.63 (d, *J* = 5.5 Hz, 1H), 1.81 (d, *J* = 4.3 Hz, 1H),

1.73 (d, *J* = 4.4 Hz, 1H), 1.61 (s, 3H), 0.69 (d, *J* = 1.9 Hz, 9H), 0.08 (s, 3H), 0.06 (s, 3H). <sup>13</sup>C NMR (126 MHz, Chloroform-*d*) δ 200.1, 163.4, 147.2, 145.2, 134.6, 128.3, 123.1, 119.9, 99.8, 43.7, 42.3, 34.8, 25.1, 17.7, 12.8, -5.4, -5.5. HRMS (ESI) [M+Na]<sup>+</sup> calculated for C<sub>19</sub>H<sub>25</sub>NO<sub>4</sub>SiNa<sup>+</sup>: 382.1445, found 382.1448.

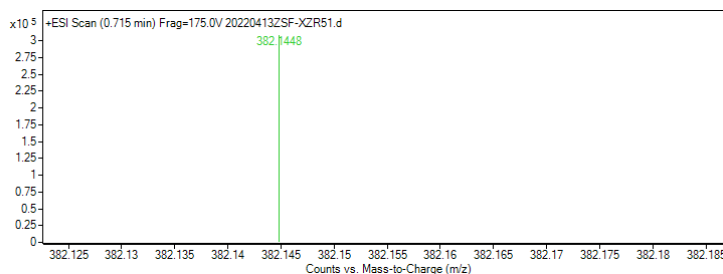

Resolution of enantiomers: Phenomenex INC column, 2% IPA-Hexanes, 0.8 mL/min, 254 nm, RT<sub>1</sub> = 22.0 min, RT<sub>2</sub> = 28.1 min. [α]<sub>D</sub><sup>25</sup> = + 125.2 (c 0.5, CH<sub>2</sub>Cl<sub>2</sub>).

<色谱图>

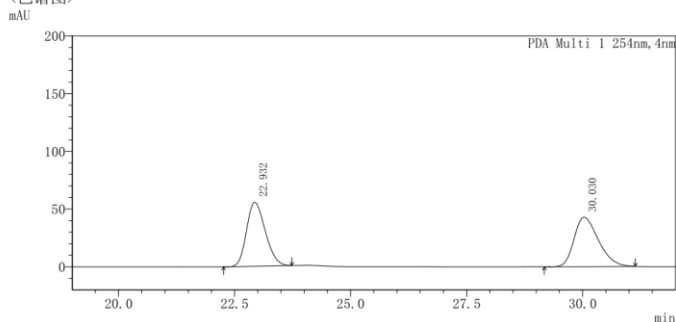

<峰表>

| 峰号 | 保留时间   | 面积      | 高度    | 化合物名 | 高度%     | 面积%     |
|----|--------|---------|-------|------|---------|---------|
| 1  | 22.932 | 1556086 | 55391 |      | 56.440  | 49.884  |
| 2  | 30.030 | 1563349 | 42751 |      | 43.560  | 50.116  |
| 总计 |        | 3119435 | 98142 |      | 100.000 | 100.000 |

<色谱图>

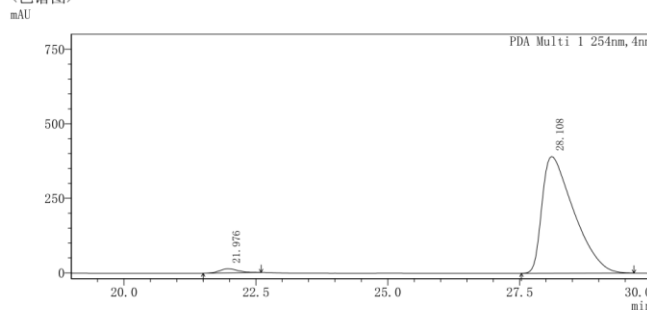

<峰表>

| 峰号 | 保留时间   | 面积       | 高度     | 化合物名 | 高度%     | 面积%     |
|----|--------|----------|--------|------|---------|---------|
| 1  | 21.976 | 341665   | 13931  |      | 3.433   | 2.037   |
| 2  | 28.108 | 16435188 | 391892 |      | 96.567  | 97.963  |
| 总计 |        | 16776853 | 405822 |      | 100.000 | 100.000 |

(1aR,6aS)-6a-((Z)-2-((tert-butyldimethylsilyl)oxy)vinyl)-1a,4-dimethyl-1a,6a-dihydrocyclopropa[a]inden-6(1H)-one(2k)

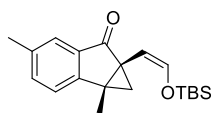

Yellow liquid, 14.0 mg, 85%, 91% ee, purified by chromatography (PE/EA = 20/1, Rf = 0.4); <sup>1</sup>H NMR

(500 MHz, Chloroform-*d*) δ 7.27 (d, *J* = 0.9 Hz, 2H), 6.55 (d, *J* = 5.6 Hz, 1H), 4.61 (d, *J* = 5.7 Hz, 1H),

2.34 (s, 3H), 1.69 (q, *J* = 4.0 Hz, 2H), 1.55 (s, 3H), 0.72 (s, 9H), 0.08 (s, 3H), 0.06 (s, 3H). <sup>13</sup>C NMR

(126 MHz, Chloroform-*d*) δ 203.3, 154.7, 144.0, 136.3, 134.2, 133.5, 124.7, 121.9, 101.1, 44.3, 40.5, 34.1, 25.2, 21.0, 17.7, 13.2, -5.4, -5.5. HRMS (ESI) [M+H]<sup>+</sup> calculated for C<sub>20</sub>H<sub>29</sub>O<sub>2</sub>Si<sup>+</sup>: 329.1932, found 329.1938.

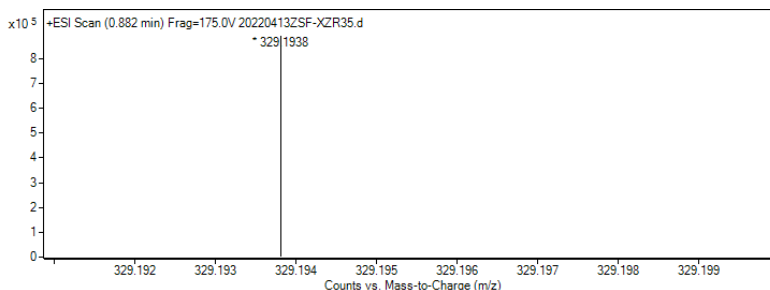

Resolution of enantiomers: DAICEL Chiralcel<sup>®</sup> ODHcolumn, 2% IPA-Hexanes, 0.5 mL/min, 254 nm, RT<sub>1</sub> = 9.1 min, RT<sub>2</sub> = 10.1min.  $[\alpha]_D^{25} = +48.8$  (c 0.5, CH<sub>2</sub>Cl<sub>2</sub>).

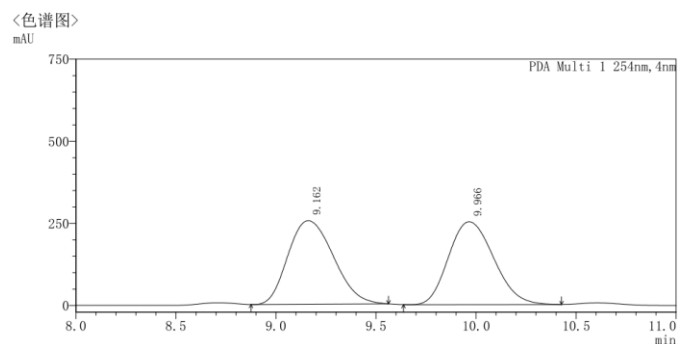

<峰表>

| 峰号 | 保留时间  | 面积      | 高度     | 化合物名 | 高度%     | 面积%     |
|----|-------|---------|--------|------|---------|---------|
| 1  | 9.162 | 4035256 | 254550 |      | 50.228  | 50.467  |
| 2  | 9.966 | 3960616 | 252235 |      | 49.772  | 49.533  |
| 总计 |       | 7995873 | 506785 |      | 100.000 | 100.000 |

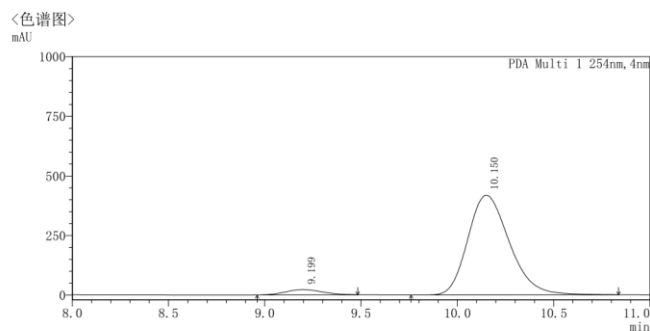

<峰表>

| 峰号 | 保留时间   | 面积      | 高度     | 化合物名 | 高度%     | 面积%     |
|----|--------|---------|--------|------|---------|---------|
| 1  | 9.199  | 297179  | 22306  |      | 5.063   | 4.511   |
| 2  | 10.150 | 6290638 | 418258 |      | 94.937  | 95.489  |
| 总计 |        | 6587818 | 440564 |      | 100.000 | 100.000 |

**(1aR,6aS)-6a-((Z)-2-((tert-butyldimethylsilyloxy)vinyl)-4-methoxy-1a-methyl-1a,6a-dihydrocyclopropa[a]inden-6(1H)-one (2l)**

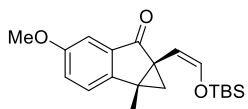

Yellow liquid, 14,1 mg, 82%, 80% ee, purified by chromatography (PE/EA = 15/1, R<sub>f</sub> = 0.4); <sup>1</sup>H NMR (400 MHz, Chloroform-*d*) δ 7.29 (d, *J* = 8.3 Hz, 1H), 7.13 (d, *J* = 2.5 Hz, 1H), 7.03 (dd, *J* = 8.3, 2.6 Hz, 1H), 6.55 (d, *J* = 5.6 Hz, 1H), 4.61 (d, *J* = 5.6 Hz, 1H), 3.79 (s, 3H), 1.72 (d, *J* = 4.0 Hz, 1H), 1.65 (d, *J* = 3.9 Hz, 1H), 1.54 (s, 3H), 0.72 (s, 9H), 0.08 (s, 3H), 0.06 (s, 3H). <sup>13</sup>C NMR (101 MHz, Chloroform-*d*) δ 203.1, 158.8, 150.1, 144.1, 134.7, 123.0, 121.4, 107.2, 101.2, 55.9, 44.8, 40.6, 33.8, 25.2, 17.7, 13.3, -5.4, -5.5. HRMS (ESI) [M+H]<sup>+</sup> calculated for C<sub>20</sub>H<sub>29</sub>O<sub>3</sub>Si<sup>+</sup>: 345.1881, found 345.1887.

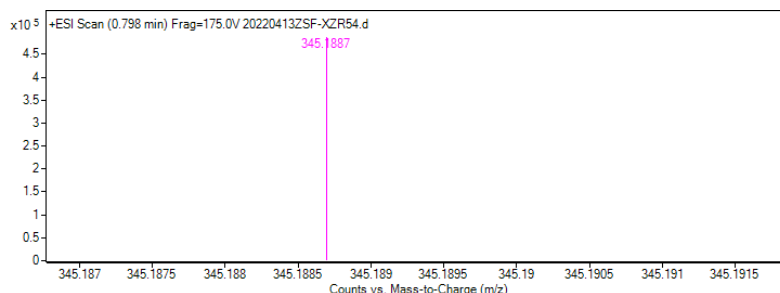

Resolution of enantiomers: DAICEL Chiralcel<sup>®</sup> ODHcolumn, 2% IPA-Hexanes, 1.0 mL/min, 254 nm, RT<sub>1</sub> = 5.8 min, RT<sub>2</sub> = 6.3 min.  $[\alpha]_D^{25} = +23.6$  (c 0.5, CH<sub>2</sub>Cl<sub>2</sub>).

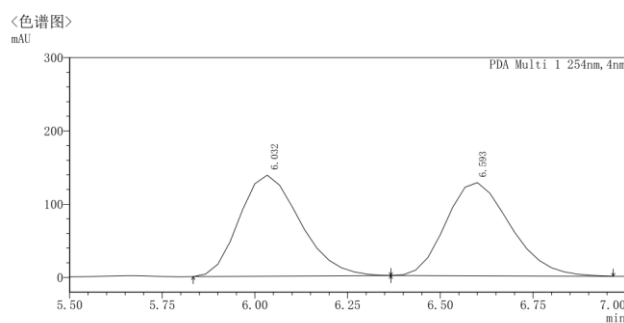

<峰表>

| 峰号 | 保留时间  | 面积      | 高度     | 化合物名 | 高度%     | 面积%     |
|----|-------|---------|--------|------|---------|---------|
| 1  | 6.032 | 1570662 | 137988 |      | 52.041  | 50.478  |
| 2  | 6.593 | 1540935 | 127162 |      | 47.959  | 49.522  |
| 总计 |       | 3111597 | 265150 |      | 100.000 | 100.000 |

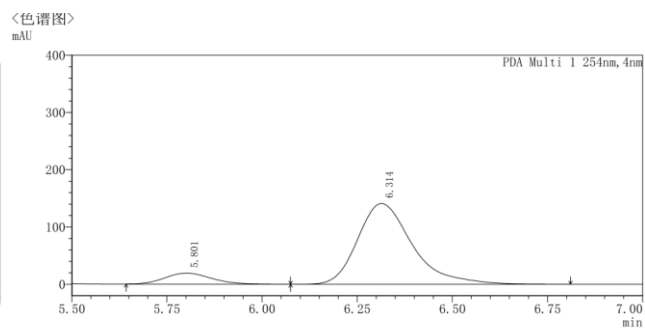

<峰表>

| 峰号 | 保留时间  | 面积      | 高度     | 化合物名 | 高度%     | 面积%     |
|----|-------|---------|--------|------|---------|---------|
| 1  | 5.801 | 162764  | 19261  |      | 12.014  | 10.372  |
| 2  | 6.314 | 1406541 | 141057 |      | 87.986  | 89.628  |
| 总计 |       | 1569305 | 160318 |      | 100.000 | 100.000 |

**(1aR,6aS)-6a-((Z)-2-((tert-butyldimethylsilyl)oxy)vinyl)-5-fluoro-1a-methyl-1a,6a-dihydrocyclopropa[a]inden-6(1H)-one (2m)**

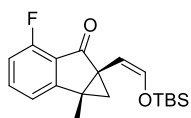

Yellow liquid, 9.1 mg, 55%, 90% ee, purified by chromatography (PE/EA = 20/1, R<sub>f</sub> = 0.4); <sup>1</sup>H NMR (500 MHz, Chloroform-*d*) δ 7.42 (dd, *J* = 7.9, 5.0 Hz, 1H), 7.18 (d, *J* = 7.5 Hz, 1H), 6.86 (t, *J* = 8.8 Hz, 1H), 6.56 (d, *J* = 5.6 Hz, 1H), 4.60 (d, *J* = 5.6 Hz, 1H), 1.74 (d, *J* = 4.1 Hz, 1H), 1.64 (d, *J* = 4.1 Hz, 1H), 1.55 (s, 3H), 0.72 (s, 9H), 0.09 (s, 3H), 0.06 (s, 3H). <sup>13</sup>C NMR (126 MHz, Chloroform-*d*) δ 199.2, 159.6 (d, *J* = 2.8 Hz), 159.4 (d, *J* = 262.6 Hz), 135.4 (d, *J* = 8.6 Hz), 120.3 (d, *J* = 12.4 Hz), 118.2 (d, *J* = 3.6 Hz), 114.1 (d, *J* = 19.8 Hz), 100.7, 43.2, 40.9, 34.1 (d, *J* = 2.0 Hz), 25.2, 17.7, 13.2, -5.4, -5.5. <sup>19</sup>F NMR (471 MHz, Chloroform-*d*) δ -114.82. HRMS (ESI) [M+H]<sup>+</sup> calculated for C<sub>19</sub>H<sub>26</sub>FO<sub>2</sub>Si<sup>+</sup>: 333.1681, found 333.1688.

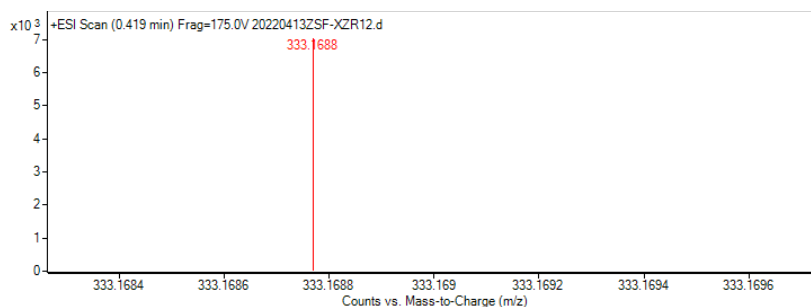

Resolution of enantiomers: DAICEL Chiralcel<sup>®</sup> ODH column, 2% IPA-Hexanes, 0.5 mL/min, 254 nm, RT<sub>1</sub> = 10.8 min, RT<sub>2</sub> = 11.4 min. [α]<sub>D</sub><sup>25</sup> = + 65.6 (c 0.5, CH<sub>2</sub>Cl<sub>2</sub>).

<色谱图>  
mAU

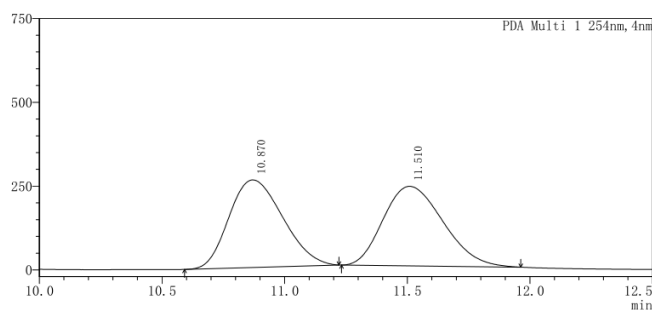

<峰表>

| 峰号 | 保留时间   | 面积      | 高度     | 化合物名 | 高度%     | 面积%     |
|----|--------|---------|--------|------|---------|---------|
| 1  | 10.870 | 3985240 | 261303 |      | 52.408  | 49.687  |
| 2  | 11.510 | 4035371 | 237286 |      | 47.592  | 50.313  |
| 总计 |        | 8020611 | 498589 |      | 100.000 | 100.000 |

<色谱图>

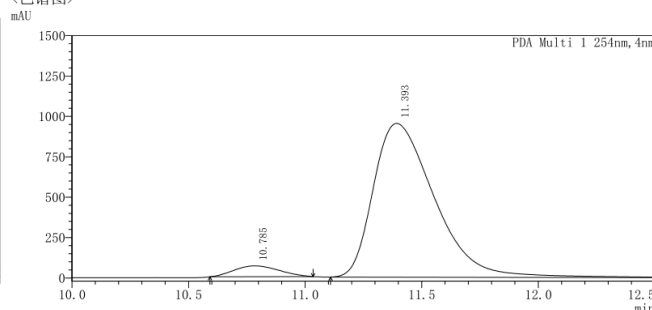

<峰表>

| 峰号 | 保留时间   | 面积       | 高度      | 化合物名 | 高度%     | 面积%     |
|----|--------|----------|---------|------|---------|---------|
| 1  | 10.785 | 903061   | 67203   |      | 6.595   | 4.927   |
| 2  | 11.393 | 17424778 | 951812  |      | 93.405  | 95.073  |
| 总计 |        | 18327839 | 1019015 |      | 100.000 | 100.000 |

**(1aR,6aS)-6a-((Z)-2-((tert-butyldimethylsilyl)oxy)vinyl)-1a,3-dimethyl-1a,6a-dihydrocyclopropa[a]inden-6(1H)-one (2n)**

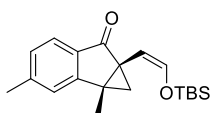

Yellow liquid, 13.3 mg, 81%, 91% ee, purified by chromatography (PE/EA = 20/1, R<sub>f</sub> = 0.4); <sup>1</sup>H NMR (400 MHz, Chloroform-*d*) δ 7.51 (d, *J* = 7.7 Hz, 1H), 7.19 (s, 1H), 7.04 (d, *J* = 7.7 Hz, 1H), 6.55 (d, *J* = 5.7 Hz, 1H), 4.61 (d, *J* = 5.7 Hz, 1H), 2.40 (s, 3H), 1.68 (q, *J* = 4.1 Hz, 2H), 1.55 (s, 3H), 0.72 (s, 9H), 0.08 (s, 3H), 0.06 (s, 3H). <sup>13</sup>C NMR (101 MHz, Chloroform-*d*) δ 202.7, 157.8, 144.3, 144.0, 131.0, 127.5, 124.4, 122.9, 101.1, 44.0, 40.5, 34.0, 25.2, 22.1, 17.7, 13.1, -5.4, -5.5. HRMS (ESI) [M+H]<sup>+</sup> calculated for C<sub>20</sub>H<sub>29</sub>O<sub>2</sub>Si<sup>+</sup>: 329.1932, found 329.1938.



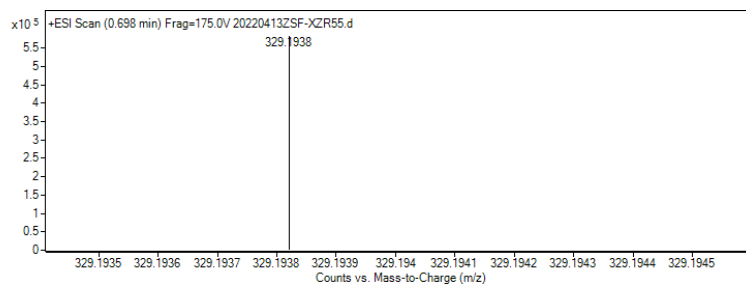

Resolution of enantiomers: DAICEL Chiralcel® ODH column, 2% IPA-Hexanes, 1.0 mL/min, 254 nm, RT<sub>1</sub> = 5.0 min, RT<sub>2</sub> = 5.8 min.  $[\alpha]_D^{25} = +8.7$  (c 0.5, CH<sub>2</sub>Cl<sub>2</sub>).

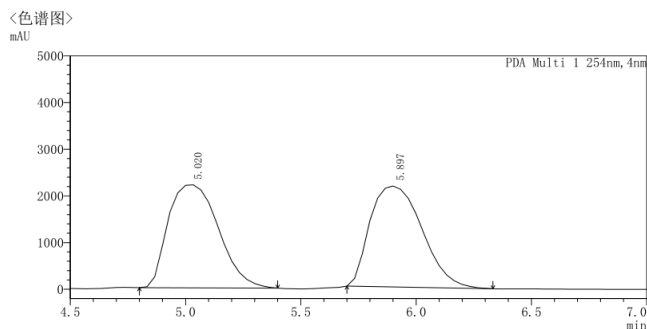

<峰表>

| 峰号 | 保留时间  | 面积       | 高度      | 化合物名 | 高度%     | 面积%     |
|----|-------|----------|---------|------|---------|---------|
| 1  | 5.020 | 33546266 | 2207215 |      | 50.511  | 49.732  |
| 2  | 5.897 | 33907893 | 2162571 |      | 49.489  | 50.268  |
| 总计 |       | 67454159 | 4369786 |      | 100.000 | 100.000 |

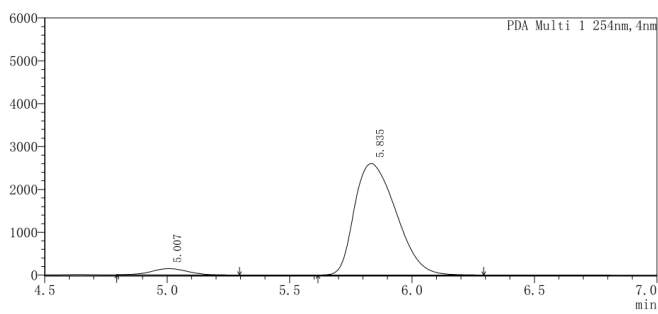

<峰表>

| 峰号 | 保留时间  | 面积       | 高度      | 化合物名 | 高度%     | 面积%     |
|----|-------|----------|---------|------|---------|---------|
| 1  | 5.007 | 1495691  | 145331  |      | 5.293   | 4.634   |
| 2  | 5.835 | 30781254 | 2600503 |      | 94.707  | 95.366  |
| 总计 |       | 32276945 | 2745834 |      | 100.000 | 100.000 |

**(1aR,6aS)-6a-((Z)-2-((tert-butyldimethylsilyloxy)vinyl)-3-fluoro-1a-methyl-1a,6a-dihydrocyclopropa[a]inden-6(1H)-one (2o)**

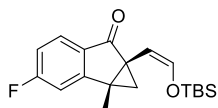

Yellow liquid, 11.3 mg, 68%, 93% ee, purified by chromatography (PE/EA = 20/1, R<sub>f</sub> = 0.4); <sup>1</sup>H NMR (500 MHz, Chloroform-*d*) δ 7.61 (dd, *J* = 8.3, 5.3 Hz, 1H), 7.07 (dd, *J* = 8.7, 2.3 Hz, 1H), 6.92 (td, *J* = 8.7, 2.3 Hz, 1H), 6.56 (d, *J* = 5.6 Hz, 1H), 4.61 (d, *J* = 5.6 Hz, 1H), 1.72 (d, *J* = 4.1 Hz, 1H), 1.64 (d, *J* = 4.1 Hz, 1H), 1.54 (s, 3H), 0.71 (s, 9H), 0.08 (s, 3H), 0.06 (s, 3H). <sup>13</sup>C NMR (126 MHz, Chloroform-*d*) δ 201.1, 166.5 (d, *J* = 254.1 Hz), 160.3 (d, *J* = 9.6 Hz), 144.5, 129.56 (d, *J* = 2.2 Hz), 114.0 (d, *J* = 23.4 Hz), 109.9 (d, *J* = 23.0 Hz), 100.7, 43.7, 40.8, 33.7 (d, *J* = 2.4 Hz), 25.2, 17.7, 13.0, -5.4, -5.5. <sup>19</sup>F NMR (471 MHz, Chloroform-*d*) δ -104.74. HRMS (ESI) [M+H]<sup>+</sup> calculated for C<sub>19</sub>H<sub>26</sub>FO<sub>2</sub>Si<sup>+</sup>: 333.1681, found 333.1678.

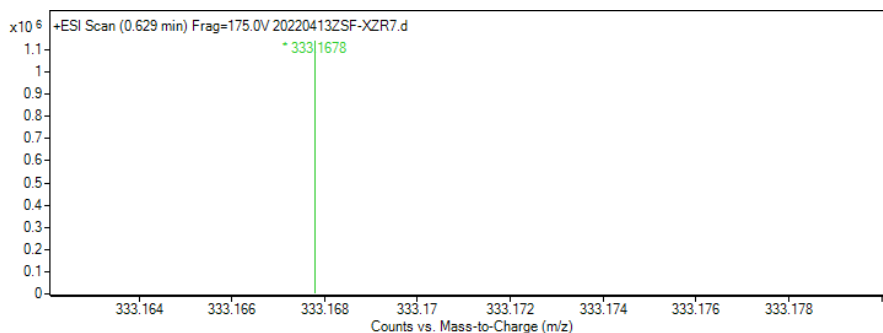

Resolution of enantiomers: DAICEL Chiralcel® ODHcolumn, 2% IPA-Hexanes, 0.5 mL/min, 254 nm, RT<sub>1</sub> = 9.7 min, RT<sub>2</sub> = 10.8 min.  $[\alpha]_D^{25} = +21.1$  (c 0.5, CH<sub>2</sub>Cl<sub>2</sub>).

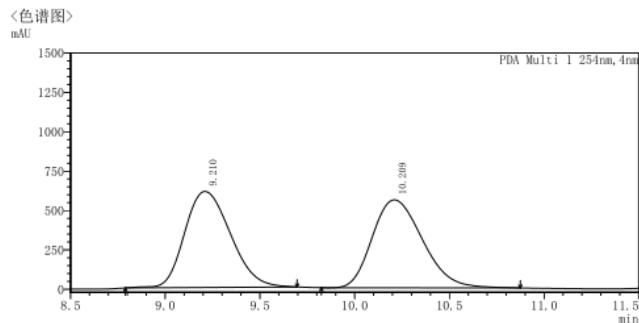

<峰表>

| 峰号 | 保留时间   | 面积       | 高度      | 化合物名 | 高度%     | 面积%     |
|----|--------|----------|---------|------|---------|---------|
| 1  | 9.210  | 10265027 | 609754  |      | 52.180  | 49.880  |
| 2  | 10.209 | 10314338 | 558815  |      | 47.820  | 50.120  |
| 总计 |        | 20579365 | 1168569 |      | 100.000 | 100.000 |

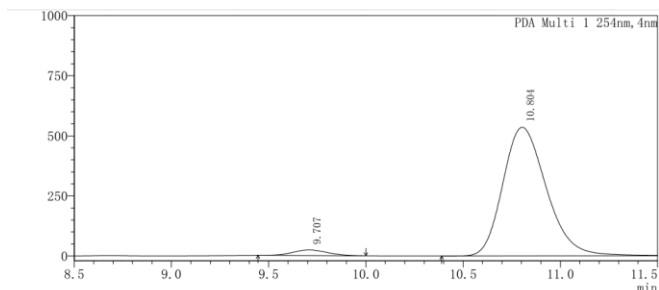

<峰表>

| 峰号 | 保留时间   | 面积      | 高度     | 化合物名 | 高度%     | 面积%     |
|----|--------|---------|--------|------|---------|---------|
| 1  | 9.707  | 288882  | 23299  |      | 4.172   | 3.342   |
| 2  | 10.804 | 8355491 | 535219 |      | 95.828  | 96.658  |
| 总计 |        | 8644373 | 558517 |      | 100.000 | 100.000 |

**(1aR,6aS)-6a-((Z)-2-((tert-butylidimethylsilyloxy)viny)-3-chloro-1a-methyl-1a,6a-dihydrocyclopropa[a]inden-6(1H)-one (2p)**

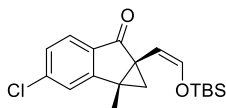

Yellow solid, M.P: 84-85°C, 12.5 mg, 72%, 92% ee, purified by chromatography (PE/EA = 20/1, Rf = 0.4); <sup>1</sup>H NMR (500 MHz, Chloroform-*d*) δ 7.54 (d, *J* = 8.1 Hz, 1H), 7.38 (d, *J* = 1.8 Hz, 1H), 7.22 (dd, *J* = 8.1, 1.8 Hz, 1H), 6.56 (d, *J* = 5.6 Hz, 1H), 4.60 (d, *J* = 5.6 Hz, 1H), 1.72 (d, *J* = 4.2 Hz, 1H), 1.65 (d, *J* = 4.1 Hz, 1H), 1.55 (s, 3H), 0.71 (s, 9H), 0.08 (s, 3H), 0.06 (s, 3H). <sup>13</sup>C NMR (126 MHz, Chloroform-*d*) δ 201.4, 158.9, 144.6, 139.8, 131.9, 127.1, 125.7, 122.9, 100.6, 43.6, 40.7, 34.0, 25.2, 17.7, 13.0, -5.4, -5.5. HRMS (ESI) [M+H]<sup>+</sup> calculated for C<sub>19</sub>H<sub>26</sub>ClO<sub>2</sub>Si<sup>+</sup>: 349.1385, found 349.1390.

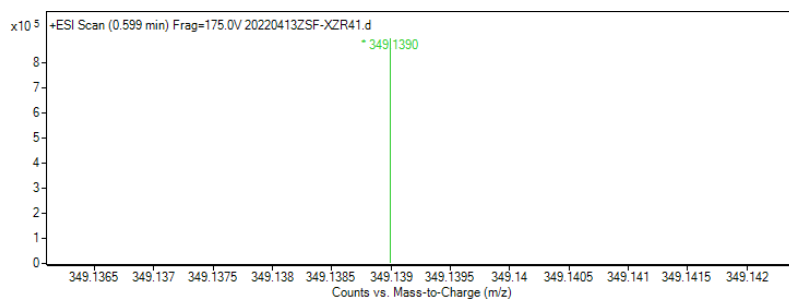

Resolution of enantiomers: DAICEL Chiralcel<sup>®</sup> ODH column, 2% IPA-Hexanes, 1.0 mL/min, 254 nm, RT<sub>1</sub> = 4.8 min, RT<sub>2</sub> = 5.4 min. [α]<sub>D</sub><sup>25</sup> = + 4.1 (c 0.5, CH<sub>2</sub>Cl<sub>2</sub>).

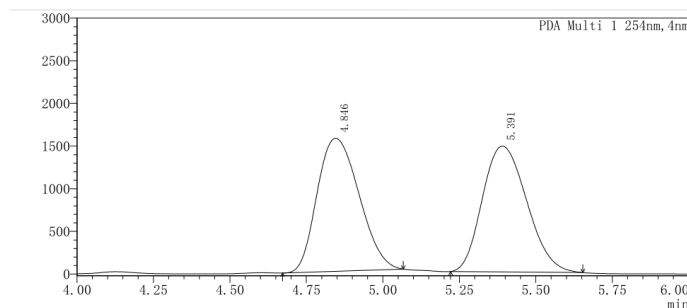

<峰表>

| 峰号 | 保留时间  | 面积       | 高度      | 化合物名 | 高度%     | 面积%     |
|----|-------|----------|---------|------|---------|---------|
| 1  | 4.816 | 14903388 | 1559363 |      | 51.395  | 49.987  |
| 2  | 5.391 | 14910856 | 1474695 |      | 48.605  | 50.013  |
| 总计 |       | 29814244 | 3034057 |      | 100.000 | 100.000 |

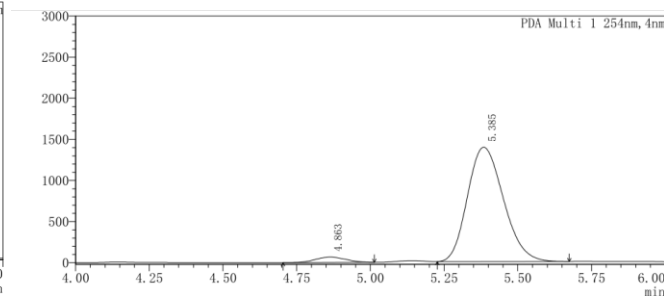

<峰表>

| 峰号 | 保留时间  | 面积       | 高度      | 化合物名 | 高度%     | 面积%     |
|----|-------|----------|---------|------|---------|---------|
| 1  | 4.863 | 476820   | 65808   |      | 4.519   | 3.878   |
| 2  | 5.385 | 11818770 | 1390482 |      | 95.481  | 96.122  |
| 总计 |       | 12295590 | 1456290 |      | 100.000 | 100.000 |

**(1a*S*,6a*S*)-6a-((*Z*)-2-((*tert*-butyldimethylsilyl)oxy)vinyl)-2-fluoro-1a-methyl-1a,6a-dihydrocyclopropa[*a*]inden-6(1*H*)-one (2q)**

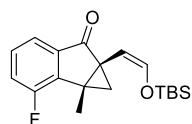

Yellow liquid, 10.3 mg, 62%, 95% ee, purified by chromatography (PE/EA = 20/1, R<sub>f</sub> = 0.4); <sup>1</sup>H NMR (500 MHz, Chloroform-*d*) δ 7.43 (d, *J* = 7.3 Hz, 1H), 7.21 (dd, *J* = 7.6, 4.4 Hz, 1H), 7.14 (ddd, *J* = 9.3, 8.1, 1.0 Hz, 1H), 6.58 (d, *J* = 5.6 Hz, 1H), 4.59 (d, *J* = 5.6 Hz, 1H), 1.81 (d, *J* = 4.3 Hz, 1H), 1.68 – 1.64 (m, 4H), 0.72 (s, 9H), 0.08 (s, 3H), 0.06 (s, 3H). <sup>13</sup>C NMR (126 MHz, Chloroform-*d*) δ 201.6, 159.3 (d, *J* = 249.7 Hz), 144.6, 141.9 (d, *J* = 15.7 Hz), 136.9, 128.3, 128.3, 120.7 (d, *J* = 21.0 Hz), 120.3 (d, *J* = 3.6 Hz), 100.6, 44.0, 40.2, 32.8, 32.8, 25.2, 17.7, 13.8, 13.8, -5.4, -5.5. <sup>19</sup>F NMR (471 MHz, Chloroform-*d*) δ -121.38. HRMS (ESI) [M+Na]<sup>+</sup> calculated for C<sub>19</sub>H<sub>25</sub>FO<sub>2</sub>SiNa<sup>+</sup>: 355.1500, found 355.1508.

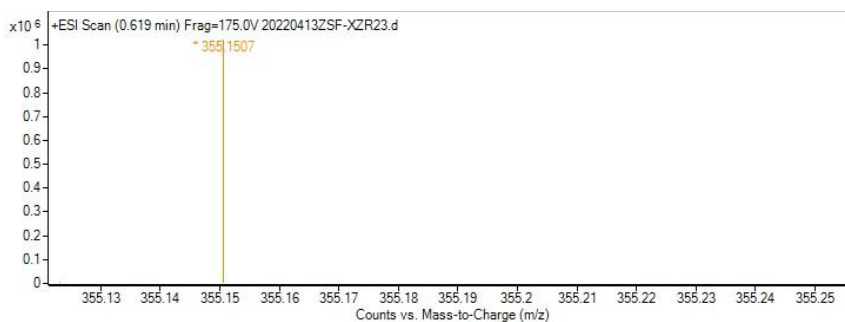

Resolution of enantiomers: DAICEL Chiralcel® ODH column, 2% IPA-Hexanes, 1.0 mL/min, 254 nm, RT<sub>1</sub> = 4.5 min, RT<sub>2</sub> = 5.3 min. [α]<sub>D</sub><sup>25</sup> = + 54.8 (c 0.5, CH<sub>2</sub>Cl<sub>2</sub>).

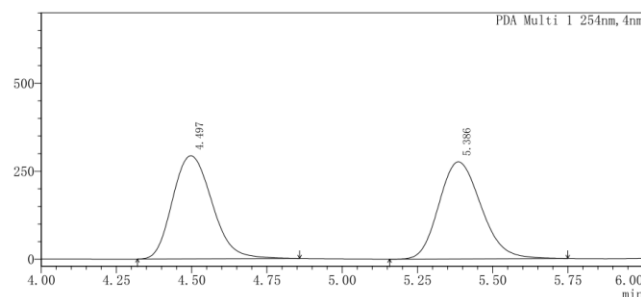

<峰表>

| 峰号 | 保留时间  | 面积      | 高度     | 化合物名 | 高度%     | 面积%     |
|----|-------|---------|--------|------|---------|---------|
| 1  | 4.497 | 2676591 | 293225 |      | 51.528  | 49.913  |
| 2  | 5.386 | 2685942 | 275839 |      | 48.472  | 50.087  |
| 总计 |       | 5362533 | 569064 |      | 100.000 | 100.000 |

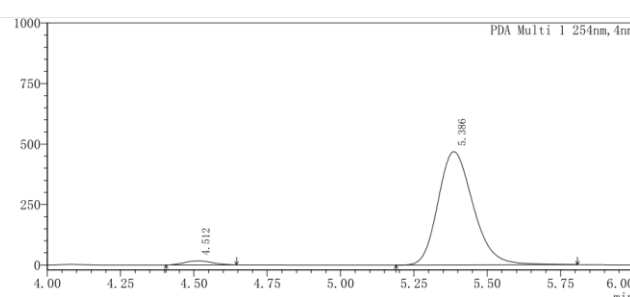

<峰表>

| 峰号 | 保留时间  | 面积      | 高度     | 化合物名 | 高度%     | 面积%     |
|----|-------|---------|--------|------|---------|---------|
| 1  | 4.512 | 110782  | 17001  |      | 3.504   | 2.759   |
| 2  | 5.386 | 3904712 | 468193 |      | 96.496  | 97.241  |
| 总计 |       | 4015495 | 485194 |      | 100.000 | 100.000 |

**(1a*S*,6a*S*)-6a-((*Z*)-2-((*tert*-butyldimethylsilyl)oxy)vinyl)-2-chloro-1a-methyl-1a,6a-dihydrocyclopropa[*a*]inden-6(1*H*)-one (2r)**

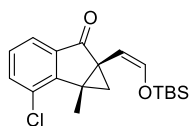

Yellow liquid, 15.8 mg, 91%, 96% ee, purified by chromatography (PE/EA = 20/1, R<sub>f</sub> = 0.4); <sup>1</sup>H NMR (400 MHz, Chloroform-*d*) δ 7.54 (dd, *J* = 7.5, 1.1 Hz, 1H), 7.42 (dd, *J* = 7.9, 1.1 Hz, 1H), 7.19 (t, *J* = 7.7 Hz, 1H), 6.58 (d, *J* = 5.6 Hz, 1H), 4.57 (d, *J* = 5.6 Hz, 1H), 1.82 (d, *J* = 4.3 Hz, 1H), 1.73 (s, 3H), 1.71 (d, *J* = 4.4 Hz, 1H), 0.73 (s, 9H), 0.09 (s, 3H), 0.07 (s, 3H). <sup>13</sup>C NMR (101 MHz, Chloroform-*d*) δ 201.6, 152.7, 144.7, 136.4, 134.7, 130.7, 128.0, 122.9, 100.8, 43.9, 40.5, 35.1, 25.2, 17.7, 13.9, -5.4, -5.5. HRMS (ESI) [M+Na]<sup>+</sup> calculated for C<sub>19</sub>H<sub>25</sub>ClO<sub>2</sub>SiNa<sup>+</sup>: 371.1204, found 371.1213.

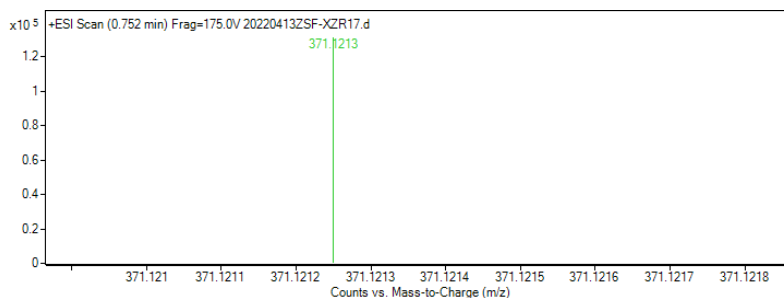

Resolution of enantiomers: DAICEL Chiralcel® ODH column, 2% IPA-Hexanes, 1.0 mL/min, 254 nm, RT<sub>1</sub> = 4.5 min, RT<sub>2</sub> = 5.4min.  $[\alpha]_D^{25} = +9.0$  (c 0.5, CH<sub>2</sub>Cl<sub>2</sub>).

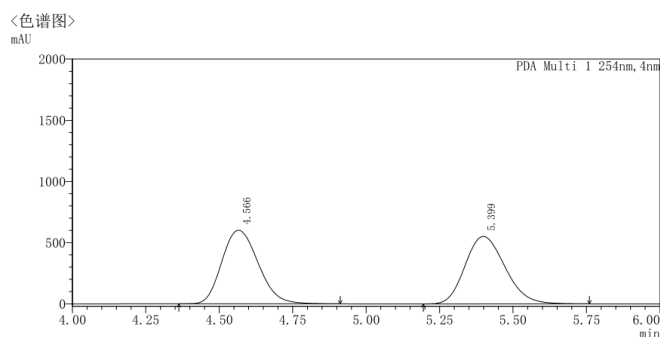

<峰表>  
PDA Ch1 254nm

| 峰号 | 保留时间  | 面积       | 高度      | 化合物名 | 高度%     | 面积%     |
|----|-------|----------|---------|------|---------|---------|
| 1  | 4.566 | 5191355  | 601336  |      | 52.159  | 49.791  |
| 2  | 5.399 | 5234928  | 551554  |      | 47.841  | 50.209  |
| 总计 |       | 10426283 | 1152890 |      | 100.000 | 100.000 |

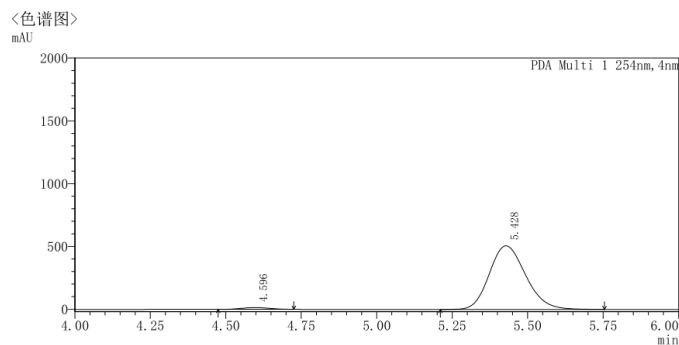

<峰表>  
PDA Ch1 254nm

| 峰号 | 保留时间  | 面积      | 高度     | 化合物名 | 高度%     | 面积%     |
|----|-------|---------|--------|------|---------|---------|
| 1  | 4.596 | 92715   | 13936  |      | 2.674   | 2.131   |
| 2  | 5.428 | 4257094 | 507166 |      | 97.326  | 97.869  |
| 总计 |       | 4349809 | 521101 |      | 100.000 | 100.000 |

**Methyl-(1aR,6aS)-6a-((Z)-2-((tert-butyldimethylsilyl)oxy)vinyl)-1a-methyl-6-oxo-1,1a,6,6a-tetrahydrocyclopropa[a]indene-4-carboxylate (2s)**

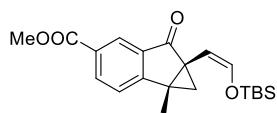

Yellow liquid, 8.9 mg, 48%, 88% ee, purified by chromatography (PE/EA = 10/1, R<sub>f</sub> = 0.4); <sup>1</sup>H NMR (500 MHz, Chloroform-*d*) δ 8.29 (d, *J* = 1.6 Hz, 1H), 8.17 (dd, *J* = 7.9, 1.7 Hz, 1H), 7.47 (d, *J* = 8.0 Hz, 1H), 6.58 (d, *J* = 5.6 Hz, 1H), 4.63 (d, *J* = 5.6 Hz, 1H), 3.91 (s, 3H), 1.75 (d, *J* = 4.2 Hz, 1H), 1.69 (d, *J* = 4.2 Hz, 1H), 1.59 (s, 3H), 0.69 (s, 9H), 0.07 (s, 3H), 0.05 (s, 3H). <sup>13</sup>C NMR (126 MHz, Chloroform-*d*) δ 201.7, 166.4, 161.9, 144.7, 134.7, 133.6, 128.9, 125.9, 122.3, 100.4, 52.2, 43.8, 41.4, 34.56, 25.2, 17.7, 12.9, -5.4, -5.5. HRMS (ESI) [M+Na]<sup>+</sup> calculated for C<sub>21</sub>H<sub>28</sub>O<sub>4</sub>SiNa<sup>+</sup>: 373.1830, found 373.1837.

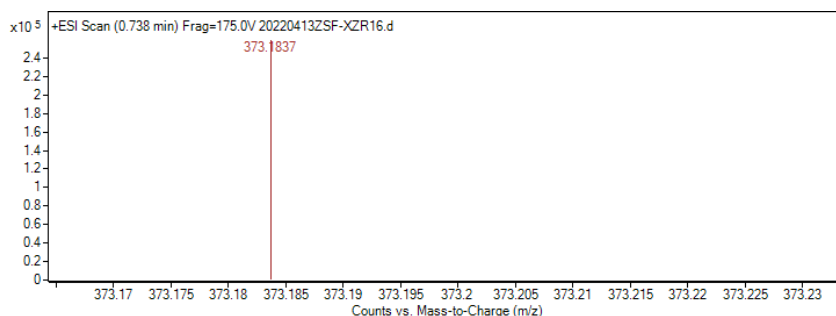

Resolution of enantiomers: DAICEL Chiralcel® ODH column, 2% IPA-Hexanes, 1.0 mL/min, 254 nm, RT<sub>1</sub> = 8.5 min, RT<sub>2</sub> = 9.7 min.  $[\alpha]_D^{25} = +120.6$  (c 0.5, CH<sub>2</sub>Cl<sub>2</sub>).

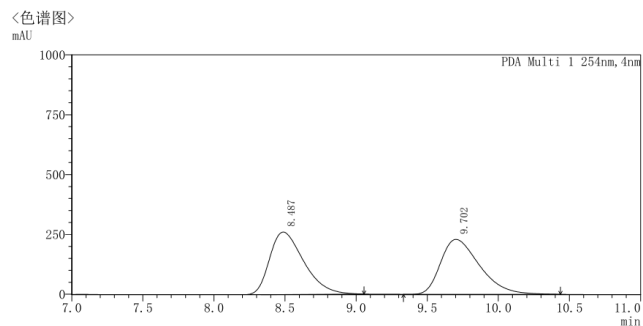

<峰表>  
PDA Ch1 254nm

| 峰号 | 保留时间  | 面积      | 高度     | 化合物名 | 高度%     | 面积%     |
|----|-------|---------|--------|------|---------|---------|
| 1  | 8.487 | 4381210 | 261423 |      | 53.255  | 49.963  |
| 2  | 9.702 | 4387711 | 229469 |      | 46.745  | 50.037  |
| 总计 |       | 8768921 | 490892 |      | 100.000 | 100.000 |

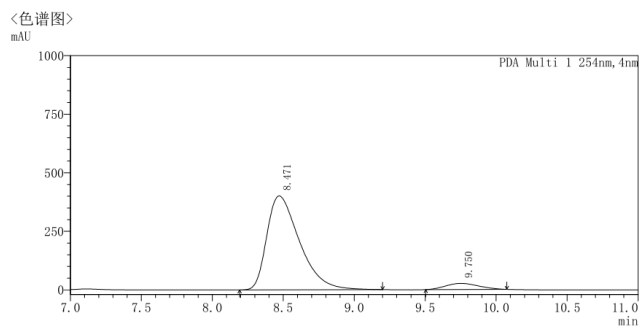

<峰表>  
PDA Ch1 254nm

| 峰号 | 保留时间  | 面积      | 高度     | 化合物名 | 高度%     | 面积%     |
|----|-------|---------|--------|------|---------|---------|
| 1  | 8.471 | 6440512 | 401145 |      | 93.914  | 93.855  |
| 2  | 9.750 | 421685  | 25996  |      | 6.086   | 6.145   |
| 总计 |       | 6862196 | 427141 |      | 100.000 | 100.000 |

**(1aR,6aS)-6a-((Z)-2-((tert-butyl dimethylsilyl)oxy)vinyl)-1a-methyl-6-oxo-1,1a,6,6a-tetrahydrocyclopropa[a]indene-2-carbaldehyde (2t)**

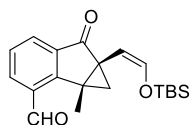

Yellow solid, M.P: 51-53 °C, 10.3 mg, 60%, 93% ee, purified by chromatography (PE/EA = 20/1, R<sub>f</sub> = 0.4); <sup>1</sup>H NMR (400 MHz, Chloroform-*d*) δ 10.57 (s, 1H), 8.01 (dd, *J* = 7.7, 1.3 Hz, 1H), 7.87 (dd, *J* = 7.4, 1.3 Hz, 1H), 7.43 (t, *J* = 7.5 Hz, 1H), 6.62 (d, *J* = 5.5 Hz, 1H), 4.61 (d, *J* = 5.6 Hz, 1H), 1.95 (d, *J* = 4.4 Hz, 1H), 1.82 (d, *J* = 4.5 Hz, 1H), 1.74 (s, 3H), 0.70 (s, 9H), 0.09 (s, 3H), 0.06 (s, 3H). <sup>13</sup>C NMR (101 MHz, Chloroform-*d*) δ 201.3, 190.5, 158.0, 145.0, 135.7, 133.9, 133.1, 129.9, 127.3, 100.7, 43.9, 41.6, 34.9, 25.16, 17.7, 16.1, -5.4, -5.5. HRMS (ESI) [M+H]<sup>+</sup> calculated for C<sub>20</sub>H<sub>27</sub>O<sub>3</sub>Si<sup>+</sup>: 343.1724, found 343.1719.

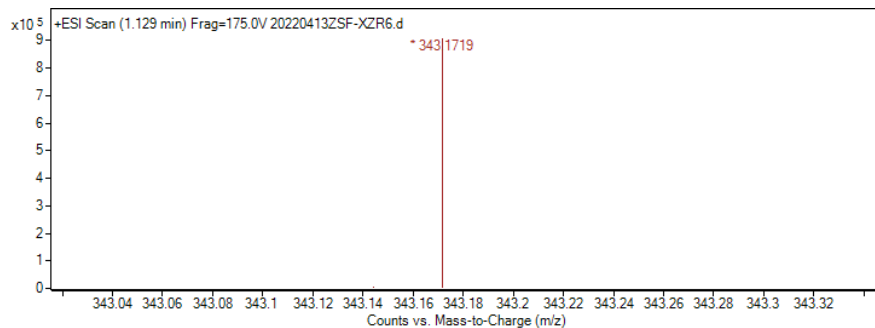

Resolution of enantiomers: DAICEL Chiralcel® ODH column, 2% IPA-Hexanes, 1.0 mL/min, 254 nm, RT<sub>1</sub> = 7.7min, RT<sub>2</sub> = 9.0 min. [α]<sub>D</sub><sup>25</sup> = -34.0 (c 0.5, CH<sub>2</sub>Cl<sub>2</sub>).

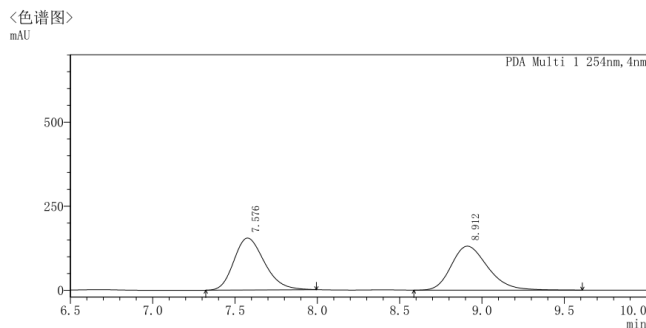

<峰表>  
PDA Ch1 254nm

| 峰号 | 保留时间  | 面积      | 高度     | 化合物名 | 高度%     | 面积%     |
|----|-------|---------|--------|------|---------|---------|
| 1  | 7.576 | 2001976 | 154356 |      | 54.131  | 49.787  |
| 2  | 8.912 | 2019123 | 130795 |      | 45.869  | 50.213  |
| 总计 |       | 4021099 | 285151 |      | 100.000 | 100.000 |

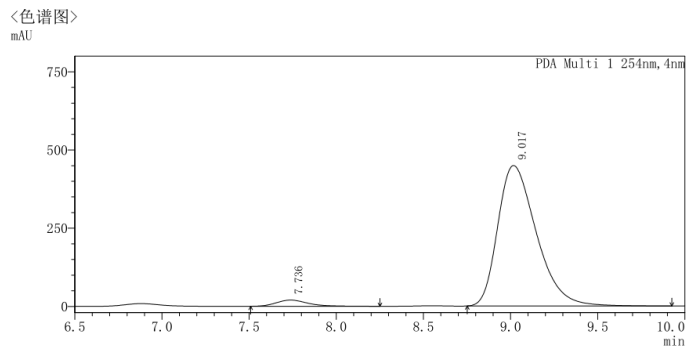

<峰表>  
PDA Ch1 254nm

| 峰号 | 保留时间  | 面积      | 高度     | 化合物名 | 高度%     | 面积%     |
|----|-------|---------|--------|------|---------|---------|
| 1  | 7.736 | 250477  | 19738  |      | 4.212   | 3.497   |
| 2  | 9.017 | 6912192 | 448932 |      | 95.788  | 96.503  |
| 总计 |       | 7162668 | 468670 |      | 100.000 | 100.000 |

**(1aR,6aS)-6a-((Z)-2-((tert-butyldimethylsilyl)oxy)vinyl)-1a-methyl-6-oxo-1,1a,6,6a-tetrahydrocyclopropa[a]indene-4-carbonitrile (2u)**

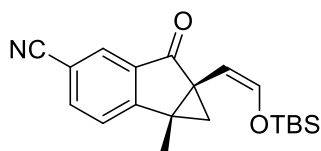

Yellow liquid, 5.1 mg, 30%, 94% ee, purified by chromatography (PE/EA = 20/1, R<sub>f</sub> = 0.5); <sup>1</sup>H NMR (400 MHz, Chloroform-*d*) δ 7.90 (s, 1H), 7.78 – 7.71 (m, 1H), 7.54 (d, *J* = 7.8 Hz, 1H), 6.60 (d, *J* = 5.5 Hz, 1H), 4.62 (d, *J* = 5.5 Hz, 1H), 1.78 (d, *J* = 4.4 Hz, 1H), 1.71 (d, *J* = 4.4 Hz, 1H), 1.60 (s, 3H), 0.70 (s, 9H), 0.09 (s, 4H), 0.06 (s, 3H). <sup>13</sup>C NMR (101 MHz, Chloroform-*d*) δ 200.3, 161.6, 145.1, 136.7, 134.2, 128.3, 123.4, 118.4, 110.6, 99.9, 43.7, 41.5, 34.8, 25.1, 17.6, 12.7, -5.4, -5.5. HRMS (ESI) [M+Na]<sup>+</sup> calculated for C<sub>20</sub>H<sub>25</sub>NO<sub>2</sub>SiNa<sup>+</sup>: 362.1547, found 362.1543.

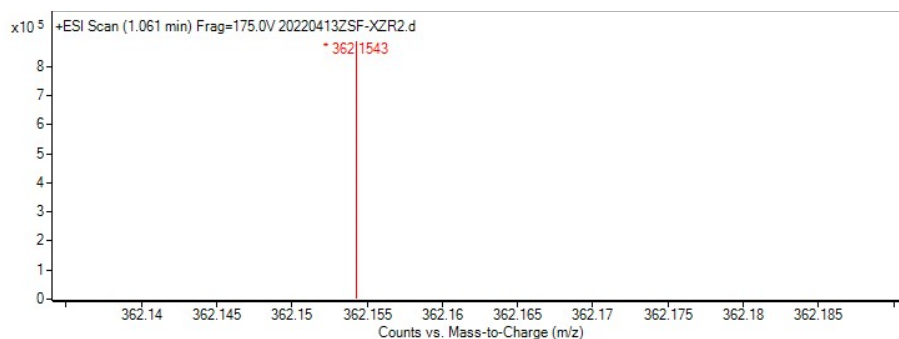

Resolution of enantiomers: DAICEL Chiralcel® ODH column, 2% IPA-Hexanes, 1.0 mL/min, 254 nm, RT<sub>1</sub> = 9.2 min, RT<sub>2</sub> = 10.0 min. [α]<sub>D</sub><sup>25</sup> = +62 (c 0.5, CH<sub>2</sub>Cl<sub>2</sub>).

<色谱图>

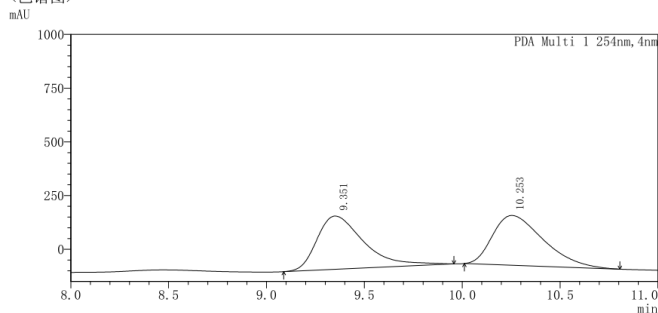

<峰表>

| 峰号 | 保留时间   | 面积      | 高度     | 化合物名 | 高度%     | 面积%     |
|----|--------|---------|--------|------|---------|---------|
| 1  | 9.351  | 4138690 | 247916 |      | 51.670  | 49.664  |
| 2  | 10.253 | 4194696 | 231888 |      | 48.330  | 50.336  |
| 总计 |        | 8333386 | 479804 |      | 100.000 | 100.000 |

<色谱图>

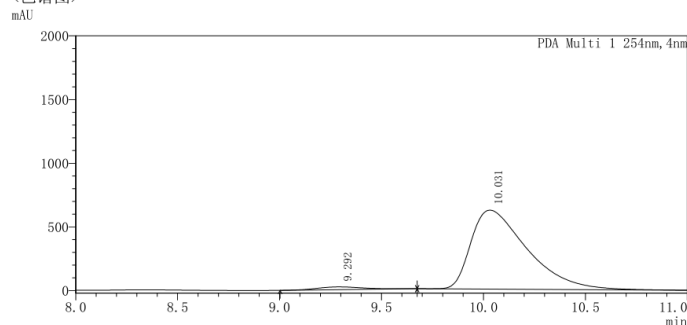

<峰表>

| 峰号 | 保留时间   | 面积       | 高度     | 化合物名 | 高度%     | 面积%     |
|----|--------|----------|--------|------|---------|---------|
| 1  | 9.292  | 351408   | 21864  |      | 3.404   | 2.856   |
| 2  | 10.031 | 11953497 | 620409 |      | 96.596  | 97.144  |
| 总计 |        | 12304905 | 642274 |      | 100.000 | 100.000 |

**(1aR,6aS)-6a-((Z)-2-((tert-butyldimethylsilyl)oxy)vinyl)-4-fluoro-1a,3-dimethyl-1a,6a-dihydrocyclopropa[a]inden-6(1H)-one (2v)**

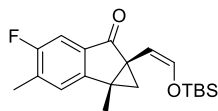

Yellow solid, M.P = 60-61 °C, 10.4 mg, 60%, 94% ee, purified by chromatography (PE/EA = 5/1, R<sub>f</sub> = 0.4); <sup>1</sup>H NMR (400 MHz, Chloroform-*d*) δ 7.21 (dd, *J* = 9.6, 7.4 Hz, 2H), 6.55 (d, *J* = 5.6 Hz, 1H), 4.59 (d, *J* = 5.6 Hz, 1H), 2.32 (d, *J* = 2.3 Hz, 3H), 1.69 (d, *J* = 4.1 Hz, 1H), 1.62 (d, *J* = 4.1 Hz, 1H), 1.54 (s, 3H), 0.72 (s, 9H), 0.08 (s, 3H), 0.06 (s, 3H). <sup>13</sup>C NMR (101 MHz, Chloroform-*d*) δ 201.8, 160.4 (d, *J* = 245.0 Hz), 152.7, 144.3, 133.0 (d, *J* = 7.1 Hz), 131.1 (d, *J* = 18.9 Hz), 124.9 (d, *J* = 4.7 Hz), 110.4 (d, *J* = 23.4 Hz), 100.9, 44.2, 40.7, 33.7,

25.2, 17.7, 15.5 (d,  $J = 4.1$  Hz), 13.2, -5.4, -5.5.  $^{19}\text{F}$  NMR (471 MHz, Chloroform- $d$ )  $\delta$  -119.55. HRMS (ESI)  $[\text{M}+\text{H}]^+$  calculated for  $\text{C}_{20}\text{H}_{28}\text{FO}_2\text{Si}^+$ : 347.1837, found 347.1832.

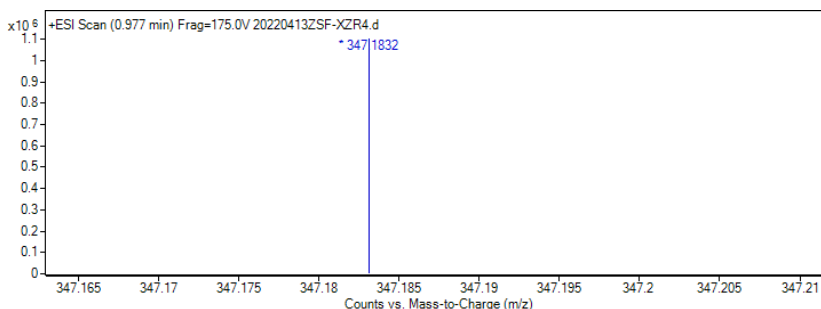

Resolution of enantiomers: DAICEL Chiralcel<sup>®</sup> ODH column, 2% IPA-Hexanes, 0.5 mL/min, 254 nm,  $\text{RT}_1 = 8.7$  min,  $\text{RT}_2 = 9.3$  min.  $[\alpha]_{\text{D}}^{25} = -28.0$  (c 0.5,  $\text{CH}_2\text{Cl}_2$ ).

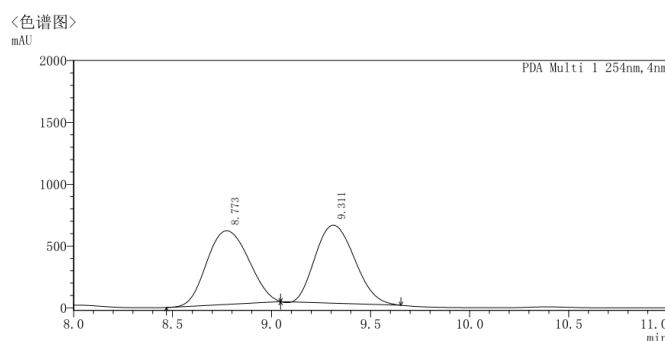

<峰表>

| 峰号 | 保留时间  | 面积       | 高度      | 化合物名 | 高度%     | 面积%     |
|----|-------|----------|---------|------|---------|---------|
| 1  | 8.773 | 8772710  | 595113  |      | 48.548  | 50.044  |
| 2  | 9.311 | 8757354  | 630716  |      | 51.452  | 49.956  |
| 总计 |       | 17530064 | 1225829 |      | 100.000 | 100.000 |

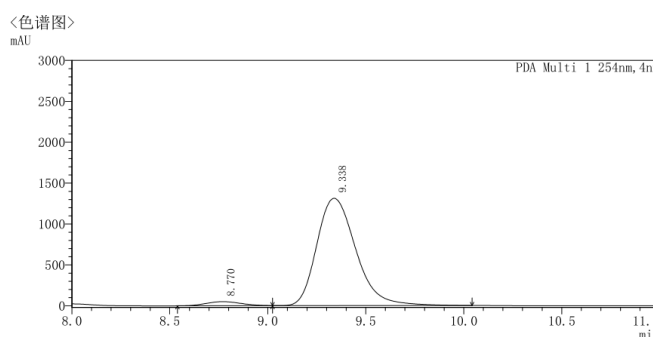

<峰表>

| 峰号 | 保留时间  | 面积       | 高度      | 化合物名 | 高度%     | 面积%     |
|----|-------|----------|---------|------|---------|---------|
| 1  | 8.770 | 623006   | 49951   |      | 3.668   | 3.312   |
| 2  | 9.338 | 18185524 | 1311753 |      | 96.332  | 96.688  |
| 总计 |       | 18808530 | 1361704 |      | 100.000 | 100.000 |

**(1aR,6aS)-6a-((Z)-2-((tert-butyl dimethylsilyl)oxy)vinyl)-3,4-difluoro-1a-methyl-1a,6a-dihydrocyclopropa[a]inden-6(1H)-one (2w)**

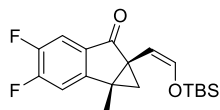

Yellow solid, M,P: 79-80 °C, 14.9 mg, 85%, 95% ee, purified by chromatography (PE/EA = 5/1,  $R_f = 0.4$ );  $^1\text{H}$  NMR (500 MHz, Chloroform- $d$ )  $\delta$  7.41 (dd,  $J = 8.9, 7.5$  Hz, 1H), 7.19 (dd,  $J = 9.6, 6.6$  Hz, 1H), 6.56 (d,  $J = 5.5$  Hz, 1H), 4.59 (d,  $J = 5.6$  Hz, 1H), 1.72 (d,  $J = 4.2$  Hz, 1H), 1.62 (d,  $J = 4.2$  Hz, 1H), 1.53 (s, 3H), 0.71 (s, 9H), 0.08 (s, 3H), 0.06 (s, 3H).  $^{13}\text{C}$  NMR (126 MHz, Chloroform- $d$ ) 200.5, 154.1 (dd,  $J = 7.6, 2.4$  Hz), 154.1 (dd,  $J = 257.0, 14.0$  Hz), 149.9 (dd,  $J = 249.4, 14.0$  Hz), 144.7, 129.6 (dd,  $J = 4.8, 2.7$  Hz), 113.1 (dd,  $J = 17.9, 2.2$  Hz), 111.5 (d,  $J = 18.9$  Hz), 100.5, 44.0, 40.6, 33.56 (d,  $J = 1.8$  Hz), 25.2, 17.7, 13.0, -5.4, -5.5.  $^{19}\text{F}$  NMR (471 MHz, Chloroform- $d$ )  $\delta$  -128.02 (d,  $J = 19.2$  Hz), -139.03 (d,  $J = 19.3$  Hz). HRMS (ESI)  $[\text{M}+\text{Na}]^+$  calculated for  $\text{C}_{19}\text{H}_{24}\text{F}_2\text{O}_2\text{SiNa}^+$ : 373.1406, found 373.1415.

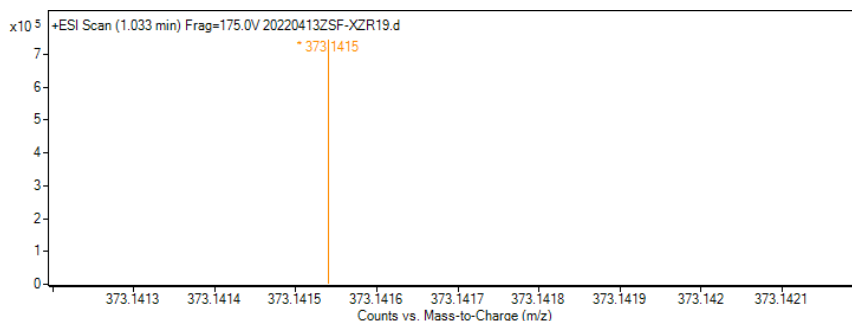

Resolution of enantiomers: Phenomenex INC column, 2% IPA-Hexanes, 0.5 mL/min, 254 nm, RT<sub>1</sub> = 10.9 min, RT<sub>2</sub> = 11.6 min.  $[\alpha]_D^{25} = -5.6$  (c 0.5, CH<sub>2</sub>Cl<sub>2</sub>).

<色谱图>  
mAU

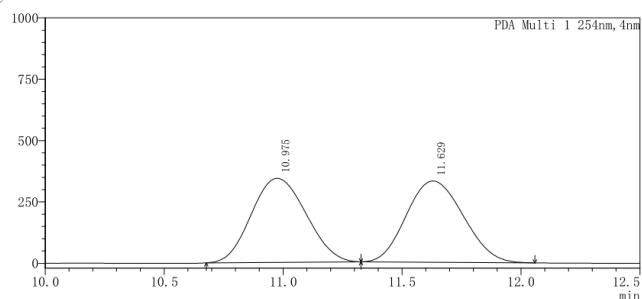

<峰表>

| 峰号 | 保留时间   | 面积       | 高度     | 化合物名 | 高度%     | 面积%     |
|----|--------|----------|--------|------|---------|---------|
| 1  | 10.975 | 5477697  | 342561 |      | 50.849  | 49.801  |
| 2  | 11.629 | 5521556  | 331117 |      | 49.151  | 50.199  |
| 总计 |        | 10999253 | 673678 |      | 100.000 | 100.000 |

<色谱图>  
mAU

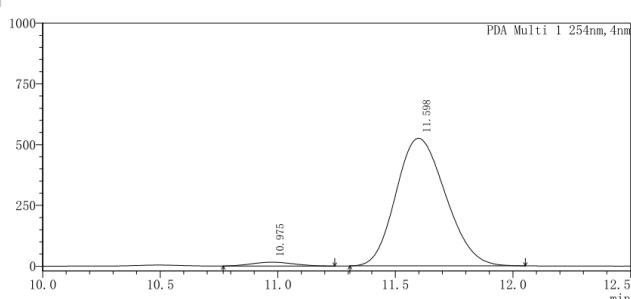

<峰表>

| 峰号 | 保留时间   | 面积      | 高度     | 化合物名 | 高度%     | 面积%     |
|----|--------|---------|--------|------|---------|---------|
| 1  | 10.975 | 196421  | 15708  |      | 2.903   | 2.477   |
| 2  | 11.598 | 7732784 | 525381 |      | 97.097  | 97.523  |
| 总计 |        | 7929205 | 541088 |      | 100.000 | 100.000 |

**(4bR,5aS)-5a-((Z)-2-((tert-butyldimethylsilyloxy)vinyloxy)-4b-methyl-5,5a-dihydrocyclopropa[1,2]indeno-[5,6-d][1,3]dioxol-6(4bH)-one (2x)**

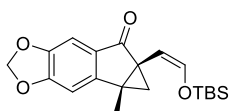

Yellow liquid, 15.8 mg, 88%, 86% ee, purified by chromatography (PE/EA = 15/1, R<sub>f</sub> = 0.4); <sup>1</sup>H

**NMR** (400 MHz, Chloroform-*d*) δ 7.02 (s, 1H), 6.84 (s, 1H), 6.54 (d, *J* = 5.6 Hz, 1H), 6.13 – 5.81 (m, 2H), 4.59 (d, *J* = 5.7 Hz, 1H), 1.67 (d, *J* = 3.9 Hz, 1H), 1.62 (d, *J* = 3.9 Hz, 1H), 1.51 (s, 3H),

0.75 (s, 9H), 0.08 (d, *J* = 7.1 Hz, 6H). <sup>13</sup>C **NMR** (101 MHz, Chloroform-*d*) δ 201.4, 154.7, 152.7, 147.0, 144.0, 127.4, 104.0, 103.0, 101.8, 101.2, 44.8, 40.2, 33.3, 25.3, 17.8, 13.2, -5.4, -5.5. **HRMS** (ESI) [M+H]<sup>+</sup> calculated for C<sub>20</sub>H<sub>27</sub>O<sub>4</sub>Si<sup>+</sup>: 359.1673, found 359.1678.

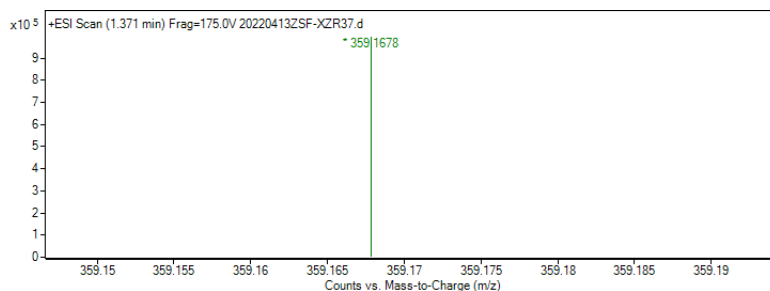

Resolution of enantiomers: DAICEL Chiralcel<sup>®</sup> ODH column, 2% IPA-Hexanes, 1.0 mL/min, 254 nm, RT<sub>1</sub> = 9.1 min, RT<sub>2</sub> = 10.7 min.  $[\alpha]_D^{25} = -47$  (c 0.5, CH<sub>2</sub>Cl<sub>2</sub>).



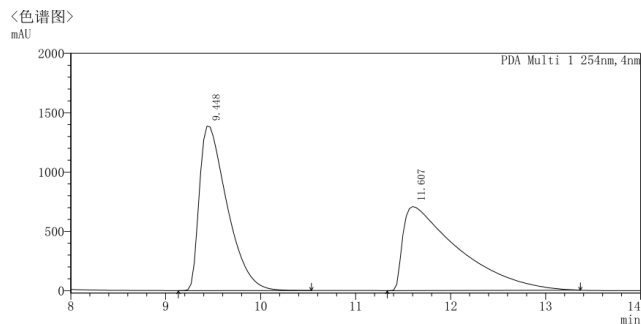

<峰表>

| 峰号 | 保留时间   | 面积       | 高度      | 化合物名 | 高度%     | 面积%     |
|----|--------|----------|---------|------|---------|---------|
| 1  | 9.448  | 28243687 | 1386611 |      | 66.222  | 49.501  |
| 2  | 11.607 | 28813663 | 707280  |      | 33.778  | 50.499  |
| 总计 |        | 57057351 | 2093890 |      | 100.000 | 100.000 |

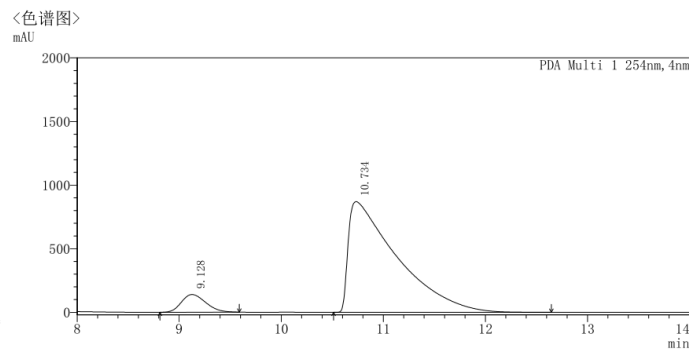

<峰表>

| 峰号 | 保留时间   | 面积       | 高度      | 化合物名 | 高度%     | 面积%     |
|----|--------|----------|---------|------|---------|---------|
| 1  | 9.128  | 2302719  | 138879  |      | 13.772  | 7.373   |
| 2  | 10.734 | 28929660 | 869541  |      | 86.228  | 92.627  |
| 总计 |        | 31232378 | 1008420 |      | 100.000 | 100.000 |

**(7aS,8aR)-7a-((Z)-2-((tert-butyl dimethylsilyl)oxy)vinyl)-8a-methyl-8,8a-dihydrocyclopropa[4,5]cyclopenta[1,2-a]naphthalen-7(7aH)-one (2y)**

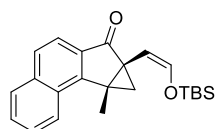

Yellow liquid, 14.8 mg, 81%, 95% ee, purified by chromatography (PE/EA = 20/1, R<sub>f</sub> = 0.4); <sup>1</sup>H NMR (500 MHz, Chloroform-*d*) δ 8.44 – 8.32 (m, 1H), 7.96 – 7.79 (m, 1H), 7.72 (d, *J* = 8.3 Hz, 1H), 7.66 (d, *J* = 8.3 Hz, 1H), 7.63 – 7.53 (m, 2H), 6.63 (d, *J* = 5.7 Hz, 1H), 4.65 (d, *J* = 5.7 Hz, 1H), 1.96 (d, *J* = 4.0 Hz, 1H), 1.90 (s, 3H), 1.87 (d, *J* = 4.1 Hz, 1H), 0.71 (s, 9H), 0.10 (s, 3H), 0.06 (s, 3H). <sup>13</sup>C NMR (126 MHz, Chloroform-*d*) δ 203.1, 157.3, 144.5, 137.0, 131.2, 129.9, 129.3, 128.0, 127.8, 126.4, 125.7, 120.4, 46.3, 40.6, 34.7, 25.3, 17.8, 15.6, -5.38, -5.43. HRMS (ESI) [M+H]<sup>+</sup> calculated for C<sub>23</sub>H<sub>29</sub>O<sub>2</sub>Si<sup>+</sup>: 365.1932, found 365.1933.

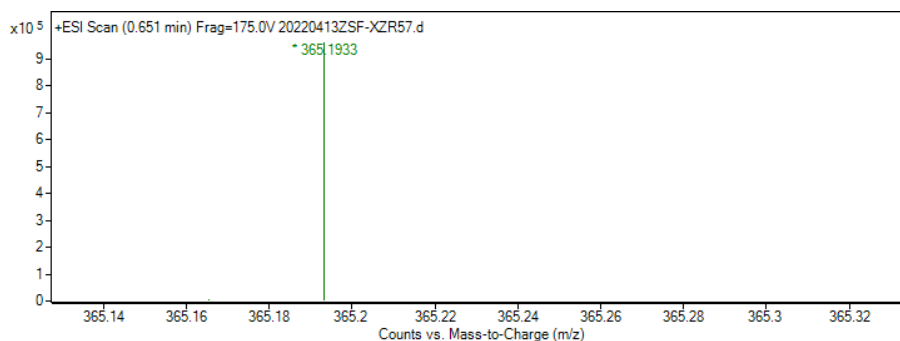

Resolution of enantiomers: Phenomenex INC column, 2% IPA-Hexanes, 1.0 mL/min, 254 nm, RT<sub>1</sub> = 12.7 min, RT<sub>2</sub> = 14.6 min. [α]<sub>D</sub><sup>25</sup> = + 11.7 (c 0.5, CH<sub>2</sub>Cl<sub>2</sub>)

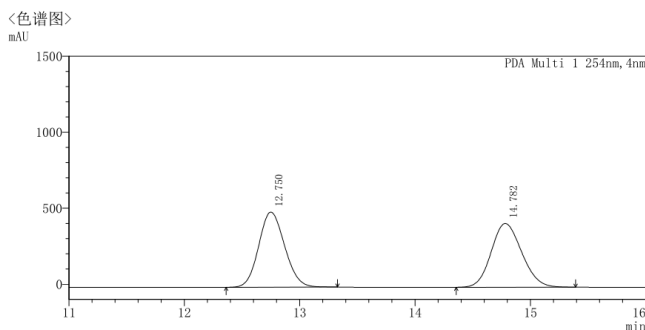

<峰表>

| 峰号 | 保留时间   | 面积       | 高度     | 化合物名 | 高度%     | 面积%     |
|----|--------|----------|--------|------|---------|---------|
| 1  | 12.750 | 7735772  | 494475 |      | 54.107  | 50.035  |
| 2  | 14.782 | 7725043  | 419400 |      | 45.893  | 49.965  |
| 总计 |        | 15460815 | 913875 |      | 100.000 | 100.000 |

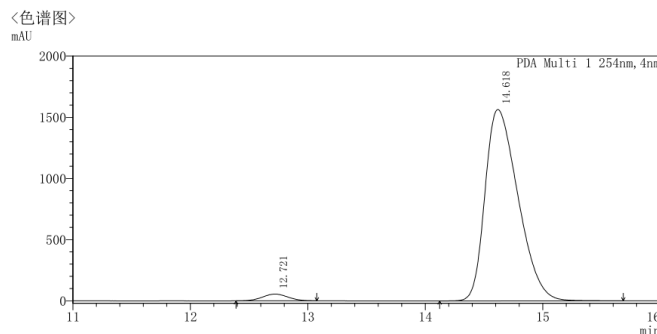

<峰表>

| 峰号 | 保留时间   | 面积       | 高度      | 化合物名 | 高度%     | 面积%     |
|----|--------|----------|---------|------|---------|---------|
| 1  | 12.721 | 839808   | 55384   |      | 3.420   | 2.677   |
| 2  | 14.618 | 30530582 | 1564213 |      | 96.580  | 97.323  |
| 总计 |        | 31370391 | 1619597 |      | 100.000 | 100.000 |

**(1aR,6aS)-6a-((Z)-2-((tert-butyldimethylsilyloxy)vinyl)-1a-ethyl-1a,6a-dihydrocyclopropa[a]inden-6(1H)-one (4a)**

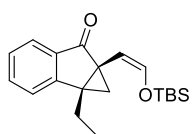

Yellow liquid, 14.2 mg, 86%, 96% ee, purified by chromatography (PE/EA = 20/1, R<sub>f</sub> = 0.4); <sup>1</sup>H NMR

(400 MHz, Chloroform-*d*) δ 7.64 (d, *J* = 7.5 Hz, 1H), 7.51 – 7.42 (m, 1H), 7.40 (d, *J* = 7.5 Hz, 1H), 7.26 – 7.20 (m, 1H), 6.52 (d, *J* = 5.8 Hz, 1H), 4.60 (d, *J* = 5.8 Hz, 1H), 2.28 (dq, *J* = 14.9, 7.5 Hz, 1H), 1.81 (d, *J* = 4.0 Hz, 1H), 1.71 (d, *J* = 3.7 Hz, 1H), 1.02 (t, *J* = 7.4 Hz, 3H), 0.77 (s, 9H), 0.12 (s, 3H),

0.08 (s, 3H). <sup>13</sup>C NMR (101 MHz, Chloroform-*d*) δ 202.7, 155.8, 143.8, 134.0, 133.2, 126.4, 124.7, 122.6, 101.0, 43.9, 40.4, 40.26, 25.3, 21.4, 17.8, 11.9, -5.38, -5.42. HRMS (ESI) [M+H]<sup>+</sup> calculated for C<sub>20</sub>H<sub>29</sub>O<sub>2</sub>Si<sup>+</sup>: 329.1932, found 329.1939.

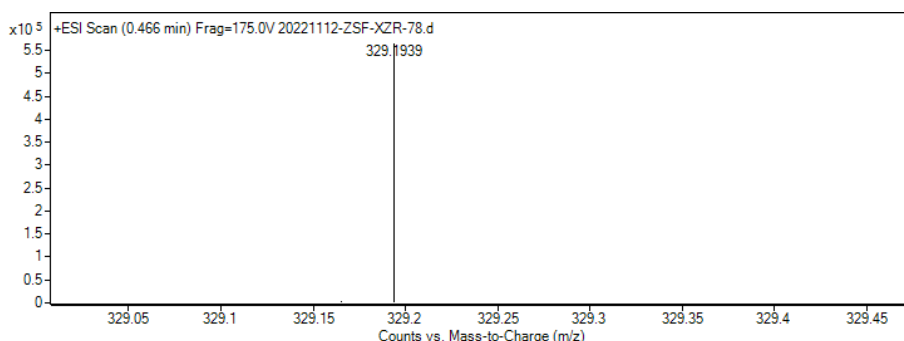

Resolution of enantiomers: DAICEL Chiralcel<sup>®</sup> ODH column, 2% IPA-Hexanes, 1.0 mL/min, 254 nm, RT<sub>1</sub> = 4.4 min, RT<sub>2</sub> = 5.1 min. [α]<sub>D</sub><sup>25</sup> = + 21.0 (c 0.5, CH<sub>2</sub>Cl<sub>2</sub>).

<色谱图>  
mAU

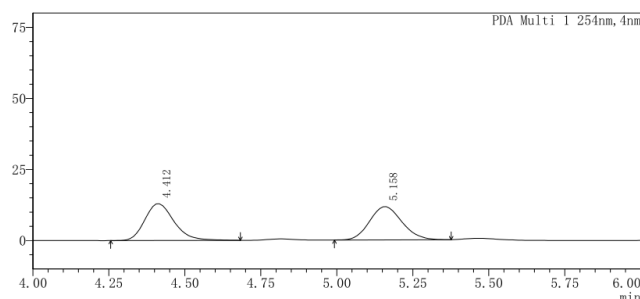

<峰表>

| 峰号 | 保留时间  | 面积     | 高度    | 化合物名 | 高度%     | 面积%     |
|----|-------|--------|-------|------|---------|---------|
| 1  | 4.412 | 87089  | 12957 |      | 52.563  | 50.153  |
| 2  | 5.158 | 86557  | 11693 |      | 47.437  | 49.847  |
| 总计 |       | 173646 | 24651 |      | 100.000 | 100.000 |

<色谱图>  
mAU

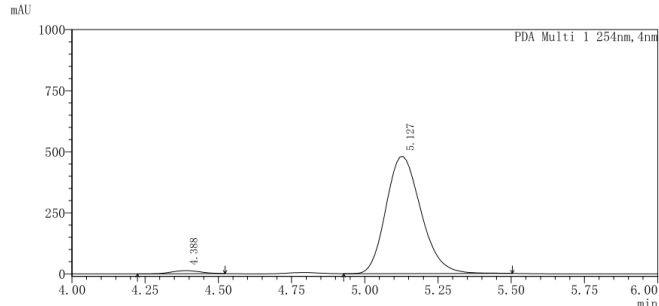

<峰表>

| 峰号 | 保留时间  | 面积      | 高度     | 化合物名 | 高度%     | 面积%     |
|----|-------|---------|--------|------|---------|---------|
| 1  | 4.388 | 89895   | 12710  |      | 2.580   | 2.201   |
| 2  | 5.127 | 3995096 | 479910 |      | 97.420  | 97.799  |
| 总计 |       | 4084991 | 492621 |      | 100.000 | 100.000 |

**(1aR,6aS)-6a-((Z)-2-((tert-butyldimethylsilyloxy)vinyl)-1a-hexyl-1a,6a-dihydrocyclopropa[a]inden-6(1H)-one (4b)**

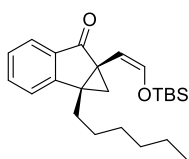

Yellow liquid, 16.2 mg, 84%, 94% ee, purified by chromatography (PE/EA = 20/1, R<sub>f</sub> = 0.4); <sup>1</sup>H NMR

(500 MHz, Chloroform-*d*) δ 7.66 (d, *J* = 7.5 Hz, 1H), 7.49 (td, *J* = 7.4, 1.3 Hz, 1H), 7.42 (d, *J* = 7.5 Hz, 1H), 7.27 (td, *J* = 7.4, 1.1 Hz, 1H), 6.55 (d, *J* = 5.8 Hz, 1H), 4.63 (d, *J* = 5.9 Hz, 1H), 2.23 (ddd, *J* = 14.5, 9.9, 6.5 Hz, 1H), 1.88 (d, *J* = 4.0 Hz, 1H), 1.74 (d, *J* = 3.9 Hz, 2H), 1.45 (tdd, *J* = 9.5, 6.3, 2.7 Hz, 2H),

1.39 – 1.28 (m, 6H), 0.91 (t, *J* = 6.8 Hz, 3H), 0.82 (s, 9H), 0.16 (s, 3H), 0.12 (s, 3H). <sup>13</sup>C NMR (126 MHz, Chloroform-*d*) δ 202.8, 156.2, 143.7, 133.8, 133.2, 126.4, 124.6, 122.7, 101.0, 44.0, 40.5, 39.5, 31.7, 29.8, 28.5, 27.5, 25.4, 22.7, 17.8, 14.1, -5.35, -5.41. HRMS (ESI) [M+H]<sup>+</sup> calculated for C<sub>24</sub>H<sub>37</sub>O<sub>2</sub>Si<sup>+</sup>: 385.2558, found 385.2563.

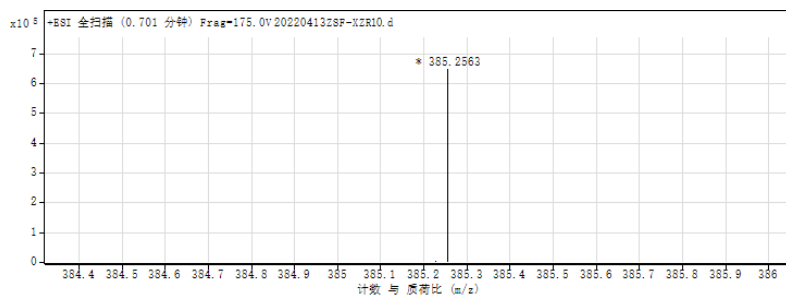

Resolution of enantiomers: DAICEL Chiralcel® ODH column, 2% IPA-Hexanes, 1.0 mL/min, 254 nm,  $RT_1 = 3.9$  min,  $RT_2 = 4.4$  min.  $[\alpha]_D^{25} = +22.2$  (c 0.5,  $CH_2Cl_2$ ).

<色谱图>  
mAU

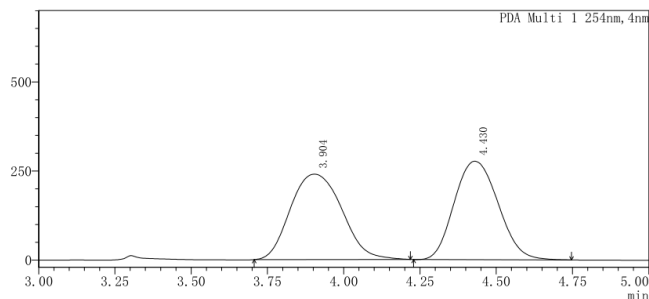

<峰表>

| 峰号 | 保留时间  | 面积      | 高度     | 化合物名 | 高度%     | 面积%     |
|----|-------|---------|--------|------|---------|---------|
| 1  | 3.904 | 2815189 | 239464 |      | 46.437  | 50.418  |
| 2  | 4.430 | 2768560 | 276208 |      | 53.563  | 49.582  |
| 总计 |       | 5583749 | 515672 |      | 100.000 | 100.000 |

<色谱图>

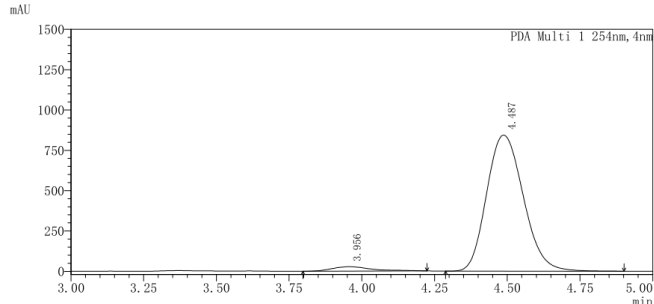

<峰表>

| 峰号 | 保留时间  | 面积      | 高度     | 化合物名 | 高度%     | 面积%     |
|----|-------|---------|--------|------|---------|---------|
| 1  | 3.956 | 256867  | 26959  |      | 3.096   | 3.350   |
| 2  | 4.487 | 7410751 | 843835 |      | 96.904  | 96.650  |
| 总计 |       | 7667618 | 870794 |      | 100.000 | 100.000 |

**(1a*S*,6a*S*)-1a-(*tert*-butyl)-6a-((*Z*)-2-((*tert*-butyldimethylsilyloxy)vinyl)-1a,6a-dihydrocyclopropa[*a*]inden-6(1*H*)-one**  
**(4c)**

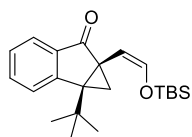

Yellow liquid, 15.1 mg, 85%, 94% ee, purified by chromatography (PE/EA = 20/1,  $R_f = 0.4$ );  $^1H$  NMR (500 MHz, Chloroform- $d$ )  $\delta$  7.79 (d,  $J = 7.8$  Hz, 1H), 7.70 (dd,  $J = 7.6, 1.4$  Hz, 1H), 7.47 (td,  $J = 7.6, 1.4$  Hz, 1H), 7.28 (t,  $J = 7.4$  Hz, 1H), 6.50 (d,  $J = 5.6$  Hz, 1H), 4.78 (d,  $J = 5.6$  Hz, 1H), 1.57 (d,  $J = 4.4$  Hz, 1H), 1.31 (s, 11H), 0.80 (s, 9H), 0.17 (s, 3H), 0.12 (s, 3H).  $^{13}C$  NMR (126 MHz, Chloroform- $d$ )  $\delta$  202.1, 156.1, 142.9, 134.1, 132.9, 126.3, 125.1, 124.8, 47.5, 40.8, 40.1, 32.6, 29.4, 25.3, 17.8, -5.28, -5.30. HRMS (ESI)  $[M+Na]^+$  calculated for  $C_{22}H_{32}O_2SiNa^+$ : 379.2064, found 379.2071.

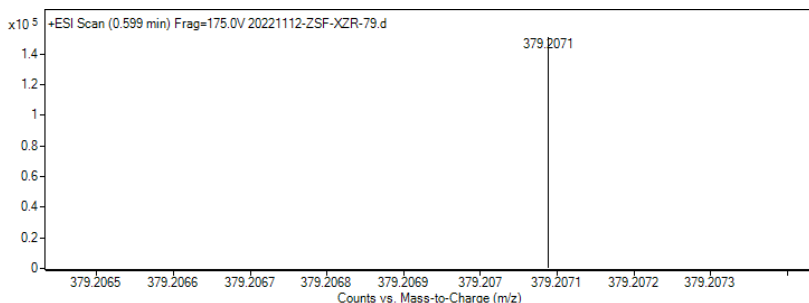

Resolution of enantiomers: Phenomenex INC column, 1% IPA-Hexanes, 0.5 mL/min, 254 nm,  $RT_1 = 16.6$  min,  $RT_2 = 20.4$  min.  $[\alpha]_D^{25} = -8.5$  (c 0.5,  $CH_2Cl_2$ ).

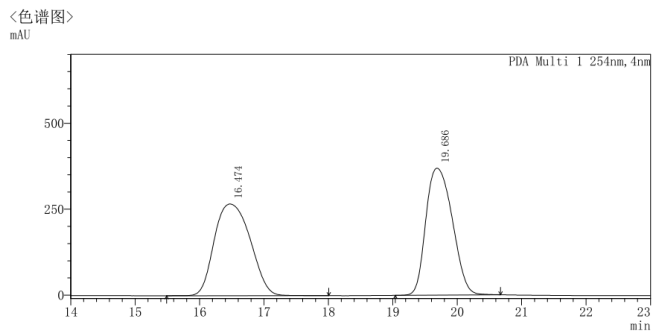

<峰表>

| 峰号 | 保留时间   | 面积       | 高度     | 化合物名 | 高度%     | 面积%     |
|----|--------|----------|--------|------|---------|---------|
| 1  | 16.474 | 10378064 | 266629 |      | 41.938  | 49.504  |
| 2  | 19.686 | 10585923 | 369136 |      | 58.062  | 50.496  |
| 总计 |        | 20963987 | 635765 |      | 100.000 | 100.000 |

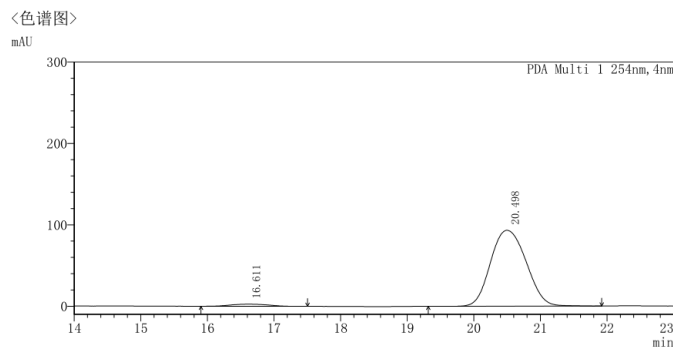

<峰表>

| 峰号 | 保留时间   | 面积      | 高度    | 化合物名 | 高度%     | 面积%     |
|----|--------|---------|-------|------|---------|---------|
| 1  | 16.611 | 101596  | 2584  |      | 2.696   | 2.849   |
| 2  | 20.498 | 3464410 | 93263 |      | 97.304  | 97.151  |
| 总计 |        | 3566005 | 95847 |      | 100.000 | 100.000 |

**(1a*S*,6a*S*)-6a-((*Z*)-2-((*tert*-butyldimethylsilyl)oxy)vinyl)-1a-cyclopropyl-1a,6a-dihydrocyclopropa[*a*]inden-6(1*H*)-one (4d)**

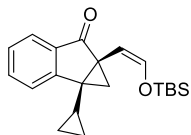

Yellow liquid, 10.9 mg, 64%, 94% ee, purified by chromatography (PE/EA = 20/1, R<sub>f</sub> = 0.4); <sup>1</sup>H NMR (400 MHz, Chloroform-*d*) δ 7.73 (d, *J* = 7.8 Hz, 2H), 7.60 – 7.54 (m, 1H), 7.38 – 7.32 (m, 1H), 6.62 (d, *J* = 5.6 Hz, 1H), 4.73 (d, *J* = 5.5 Hz, 1H), 1.58 (d, *J* = 4.4 Hz, 1H), 1.52 (d, *J* = 4.4 Hz, 1H), 1.39 (td, *J* = 8.1, 4.2 Hz, 1H), 0.96 – 0.89 (m, 1H), 0.81 (s, 9H), 0.60 (ddt, *J* = 7.3, 5.4, 2.9 Hz, 2H), 0.32 (tt, *J* = 9.4, 4.8 Hz, 1H), 0.18 (s, 3H), 0.15 (s, 3H). <sup>13</sup>C NMR (101 MHz, Chloroform-*d*) δ 202.5, 157.2, 144.0, 133.5, 133.4, 126.7, 124.4, 122.9, 101.9, 40.7, 40.3, 39.2, 25.2, 17.7, 7.9, 3.4, 1.5, -5.4, -5.5. HRMS (ESI) [M+H]<sup>+</sup> calculated for C<sub>21</sub>H<sub>29</sub>O<sub>2</sub>Si<sup>+</sup>: 341.1932, found 341.1940.

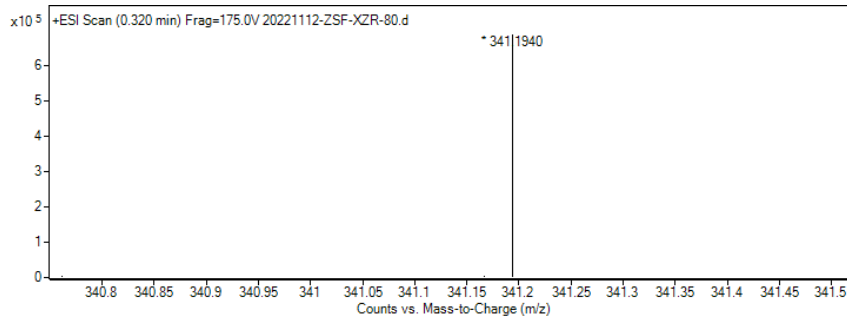

Resolution of enantiomers: DAICEL Chiralcel® ODH column, 2% IPA-Hexanes, 0.8 mL/min, 254 nm, RT<sub>1</sub> = 5.5 min, RT<sub>2</sub> = 6.0 min. [α]<sub>D</sub><sup>25</sup> = + 220 (c 0.5, CH<sub>2</sub>Cl<sub>2</sub>).

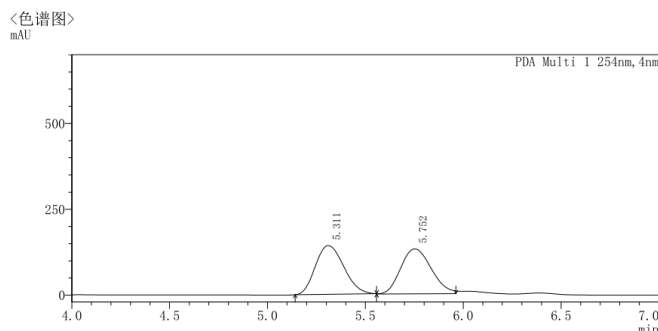

<峰表>

| 峰号 | 保留时间  | 面积      | 高度     | 化合物名 | 高度%     | 面积%     |
|----|-------|---------|--------|------|---------|---------|
| 1  | 5.311 | 1436127 | 142036 |      | 52.023  | 50.224  |
| 2  | 5.752 | 1423328 | 130991 |      | 47.977  | 49.776  |
| 总计 |       | 2859456 | 273028 |      | 100.000 | 100.000 |

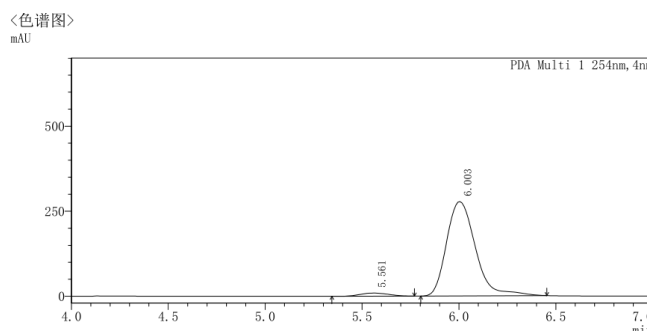

<峰表>

| 峰号 | 保留时间  | 面积      | 高度     | 化合物名 | 高度%     | 面积%     |
|----|-------|---------|--------|------|---------|---------|
| 1  | 5.561 | 94862   | 9186   |      | 3.204   | 3.194   |
| 2  | 6.003 | 2875600 | 277507 |      | 96.796  | 96.806  |
| 总计 |       | 2970462 | 286693 |      | 100.000 | 100.000 |

**(1a*S*,6a*S*)-6a-((*Z*)-2-((*tert*-butyldimethylsilyl)oxy)vinyl)-1a-cyclopentyl-1a,6a-dihydrocyclopropa[*a*]inden-6(1*H*)-one (4e)**

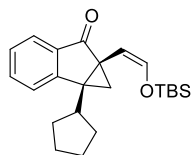

Yellow solid, M.P: 59-60°C, 14.9 mg, 81%, 96% ee, purified by chromatography (PE/EA = 20/1, Rf = 0.4); <sup>1</sup>H NMR (400 MHz, Chloroform-*d*) δ 7.66 (d, *J* = 7.5 Hz, 1H), 7.51 – 7.40 (m, 2H), 7.35 – 7.13 (m, 1H), 6.53 (d, *J* = 5.8 Hz, 1H), 4.61 (d, *J* = 5.7 Hz, 1H), 2.39 – 2.24 (m, 1H), 2.04 – 1.86 (m, 2H), 1.83 (d, *J* = 4.1 Hz, 1H), 1.79 – 1.57 (m, 6H), 1.54 – 1.33 (m, 1H), 0.79 (s, 9H), 0.13 (s, 3H), 0.09 (s, 3H). <sup>13</sup>C NMR (101 MHz, Chloroform-*d*) δ 202.5, 155.6, 143.8, 134.3, 133.0, 126.3, 124.8, 123.5, 101.8, 43.6, 41.3, 40.5, 39.8, 30.8, 29.0, 26.3, 25.9, 25.3, 17.8, -5.35, -5.39. HRMS (ESI) [M+H]<sup>+</sup> calculated for C<sub>23</sub>H<sub>33</sub>O<sub>2</sub>Si<sup>+</sup>: 369.2245, found 369.2252.

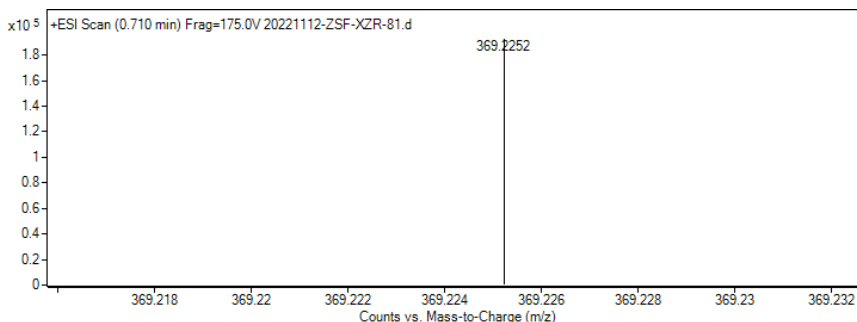

Resolution of enantiomers: DAICEL Chiralcel® ODH column, 2% IPA-Hexanes, 0.8 mL/min, 254 nm, RT<sub>1</sub> = 5.1 min, RT<sub>2</sub> = 5.9 min. [α]<sub>D</sub><sup>25</sup> = + 25.0 (c 0.5, CH<sub>2</sub>Cl<sub>2</sub>).

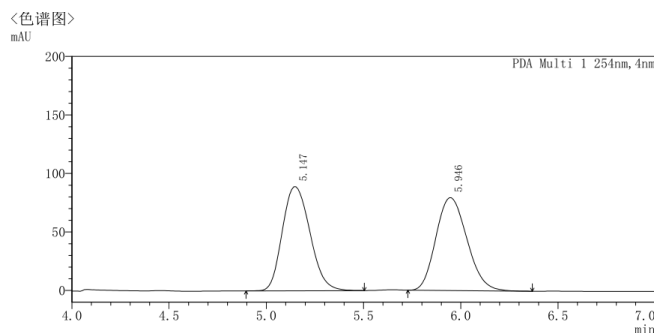

<峰表>

| 峰号 | 保留时间  | 面积      | 高度     | 化合物名 | 高度%     | 面积%     |
|----|-------|---------|--------|------|---------|---------|
| 1  | 5.117 | 880848  | 88927  |      | 52.844  | 49.906  |
| 2  | 5.916 | 884169  | 79354  |      | 47.156  | 50.094  |
| 总计 |       | 1765017 | 168281 |      | 100.000 | 100.000 |

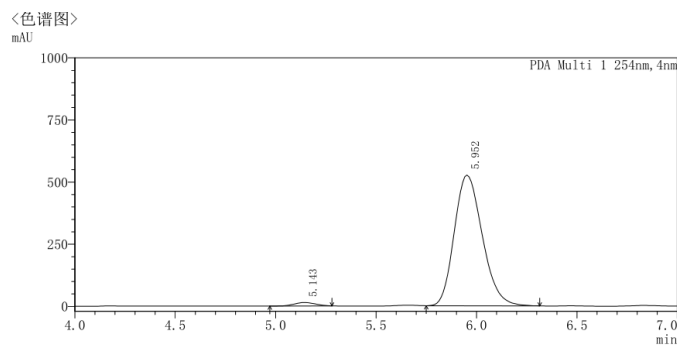

<峰表>

| 峰号 | 保留时间  | 面积      | 高度     | 化合物名 | 高度%     | 面积%     |
|----|-------|---------|--------|------|---------|---------|
| 1  | 5.143 | 102183  | 13827  |      | 2.561   | 1.960   |
| 2  | 5.952 | 5111680 | 526117 |      | 97.439  | 98.040  |
| 总计 |       | 5213863 | 539944 |      | 100.000 | 100.000 |

**(1a*S*,6a*S*)-6a-((*Z*)-2-((*tert*-butyldimethylsilyl)oxy)vinyl)-1a-cyclohexyl-1a,6a-dihydrocyclopropa[*a*]inden-6(1*H*)-one (4f)**

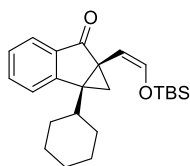

Yellow solid, M.P: 59-60°C, 15.8 mg, 83%, 96% ee, purified by chromatography (PE/EA = 20/1, Rf = 0.4); <sup>1</sup>H NMR (400 MHz, Chloroform-*d*) δ 7.70 (d, *J* = 7.6 Hz, 1H), 7.61 (d, *J* = 7.7 Hz, 1H), 7.53 – 7.46 (m, 1H), 7.29 (t, *J* = 7.4 Hz, 1H), 6.59 (d, *J* = 5.9 Hz, 1H), 4.62 (d, *J* = 5.9 Hz, 1H), 2.02 – 1.83 (m, 4H), 1.78 (dd, *J* = 11.1, 4.2 Hz, 3H), 1.71 – 1.59 (m, 2H), 1.31 (m, 4H), 0.86 (s, 9H), 0.20 (s, 3H), 0.15 (s, 3H). <sup>13</sup>C NMR (101 MHz, Chloroform-*d*) δ 202.6, 155.3, 143.8, 134.4, 133.0, 126.3, 124.7, 124.2, 101.3, 43.6, 43.2, 40.7, 39.1, 32.0, 30.2, 27.3, 26.7, 26.5, 25.3, 17.8, -5.36, -5.39. HRMS (ESI) [M+H]<sup>+</sup> calculated for C<sub>24</sub>H<sub>35</sub>O<sub>2</sub>Si<sup>+</sup>: 383.2401, found 383.2409.

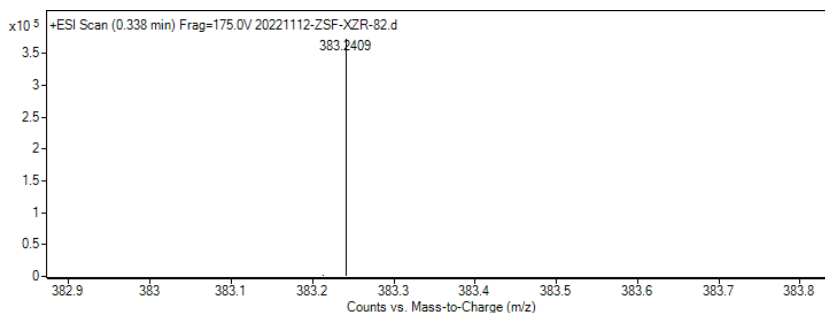

Resolution of enantiomers: DAICEL Chiralcel<sup>®</sup> ODH zcolumn, 2% IPA-Hexanes, 0.8 mL/min, 254 nm, RT<sub>1</sub> = 4.9 min, RT<sub>2</sub> = 6.0 min.  $[\alpha]_D^{25} = +39.0$  (c 0.5, CH<sub>2</sub>Cl<sub>2</sub>).

<色谱图>  
mAU

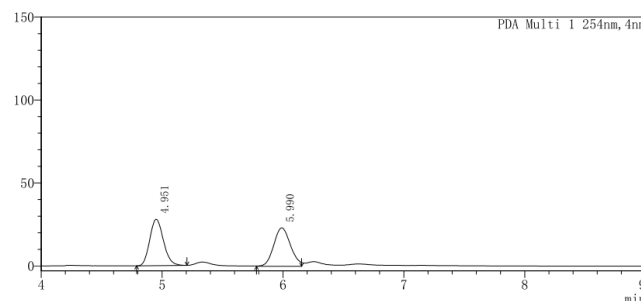

<峰表>

| 峰号 | 保留时间  | 面积     | 高度    | 化合物名 | 高度%     | 面积%     |
|----|-------|--------|-------|------|---------|---------|
| 1  | 4.951 | 220853 | 27987 |      | 54.672  | 49.596  |
| 2  | 5.990 | 224448 | 23204 |      | 45.328  | 50.404  |
| 总计 |       | 445301 | 51191 |      | 100.000 | 100.000 |

<色谱图>  
mAU

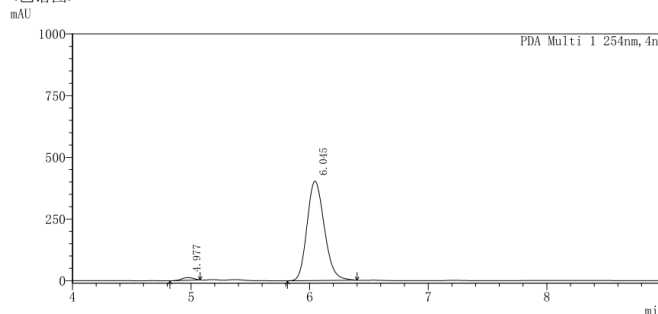

<峰表>

| 峰号 | 保留时间  | 面积      | 高度     | 化合物名 | 高度%     | 面积%     |
|----|-------|---------|--------|------|---------|---------|
| 1  | 4.977 | 77363   | 10827  |      | 2.615   | 1.861   |
| 2  | 6.045 | 4080057 | 403215 |      | 97.385  | 98.139  |
| 总计 |       | 4157420 | 414041 |      | 100.000 | 100.000 |

**(1aR,6aS)-6a-((Z)-2-((tert-butyldimethylsilyl)oxy)vinyl)-1a-(3-phenylpropyl)-1a,6a-dihydrocyclopropa[a]inden-6(1H)-one (4g)**

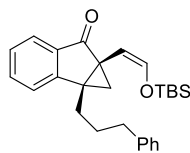

Yellow liquid, 17.8 mg, 85%, 92% ee, purified by chromatography (PE/EA = 20/1, R<sub>f</sub> = 0.4); <sup>1</sup>H NMR (400 MHz, Chloroform-*d*) δ 7.65 (d, *J* = 7.5 Hz, 1H), 7.46 (d, *J* = 1.3 Hz, 1H), 7.37 – 7.15 (m, 8H), 6.53 (d, *J* = 5.9 Hz, 1H), 4.60 (d, *J* = 5.8 Hz, 1H), 2.67 (t, *J* = 7.3 Hz, 2H), 2.34 – 2.23 (m, 1H), 1.78 (dd, *J* = 50.3, 4.0 Hz, 6H), 0.79 (s, 9H), 0.14 (s, 3H), 0.08 (s, 3H). <sup>13</sup>C NMR (101 MHz, Chloroform-*d*) δ 202.5, 155.9, 143.9, 142.1, 133.8, 133.3, 128.8, 128.3, 126.5, 125.8, 124.7, 122.6, 101.0, 43.9, 40.4, 39.2, 36.3, 29.1, 28.1, 25.3, 17.8, -5.4, -5.5. HRMS (ESI) [M+H]<sup>+</sup> calculated for C<sub>27</sub>H<sub>35</sub>O<sub>2</sub>Si<sup>+</sup>: 419.2401, found 419.2407.

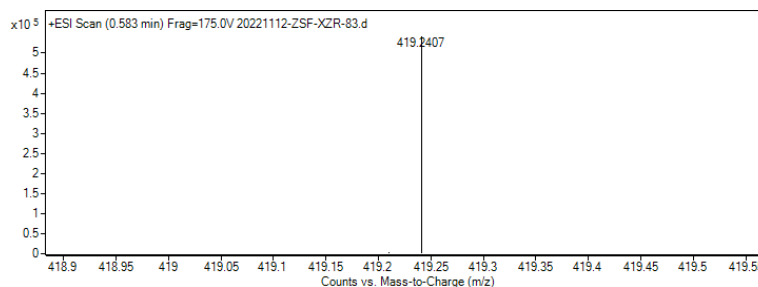

Resolution of enantiomers: DAICEL Chiralcel<sup>®</sup> ODH column, 2% IPA-Hexanes, 1.0 mL/min, 254 nm, RT<sub>1</sub> = 5.7 min, RT<sub>2</sub> = 6.9 min.  $[\alpha]_D^{25} = +20.0$  (c 0.5, CH<sub>2</sub>Cl<sub>2</sub>).

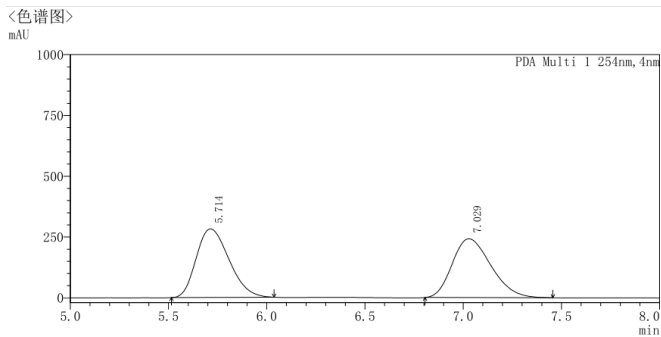

<峰表>

| 峰号 | 保留时间  | 面积      | 高度     | 化合物名 | 高度%     | 面积%     |
|----|-------|---------|--------|------|---------|---------|
| 1  | 5.714 | 3284999 | 282515 |      | 53.868  | 49.743  |
| 2  | 7.029 | 3318890 | 241946 |      | 46.132  | 50.257  |
| 总计 |       | 6603889 | 524461 |      | 100.000 | 100.000 |

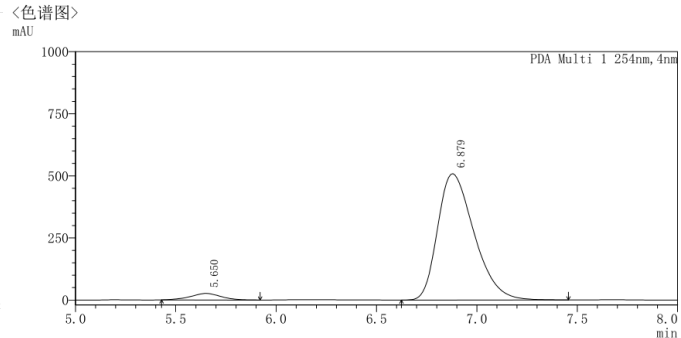

<峰表>

| 峰号 | 保留时间  | 面积      | 高度     | 化合物名 | 高度%     | 面积%     |
|----|-------|---------|--------|------|---------|---------|
| 1  | 5.650 | 277148  | 26178  |      | 4.890   | 4.130   |
| 2  | 6.879 | 6433164 | 509185 |      | 95.110  | 95.870  |
| 总计 |       | 6710312 | 535363 |      | 100.000 | 100.000 |

**(1aR,6aS)-1a-(but-3-en-1-yl)-6a-((Z)-2-((tert-butyldimethylsilyl)oxy)viny)-1a,6a-dihydrocyclopropa[a]inden-6(1H)-one (4h)**

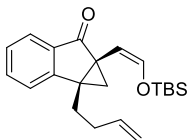

Yellow liquid, 15 mg, 85%, 98% ee, purified by chromatography (PE/EA = 20/1, R<sub>f</sub> = 0.4); <sup>1</sup>H NMR (400 MHz, Chloroform-*d*) δ 7.75 – 7.54 (m, 1H), 7.46 (td, *J* = 7.4, 1.2 Hz, 1H), 7.43 – 7.37 (m, 1H), 7.24 (dd, *J* = 7.3, 1.2 Hz, 1H), 6.53 (d, *J* = 5.9 Hz, 1H), 5.91 – 5.76 (m, 1H), 5.02 – 4.88 (m, 2H), 4.61 (d, *J* = 5.9 Hz, 1H), 2.35 (ddd, *J* = 14.1, 9.7, 6.6 Hz, 1H), 2.18 (dddd, *J* = 9.4, 7.8, 6.3, 3.3 Hz, 2H), 1.85 (d, *J* = 4.0 Hz, 1H), 1.82 – 1.74 (m, 1H), 1.72 (d, *J* = 4.0 Hz, 1H), 0.78 (s, 9H), 0.12 (s, 3H), 0.08 (s, 3H). <sup>13</sup>C NMR (101 MHz, Chloroform-*d*) δ 202.4, 155.7, 143.9, 138.5, 133.8, 133.3, 126.6, 124.7, 122.7, 114.5, 101.0, 43.83, 40.4, 39.0, 31.6, 27.9, 25.3, 17.8, -5.36, -5.40. HRMS (ESI) [M+H]<sup>+</sup> calculated for C<sub>22</sub>H<sub>31</sub>O<sub>2</sub>Si<sup>+</sup>: 355.2088, found 355.2097.

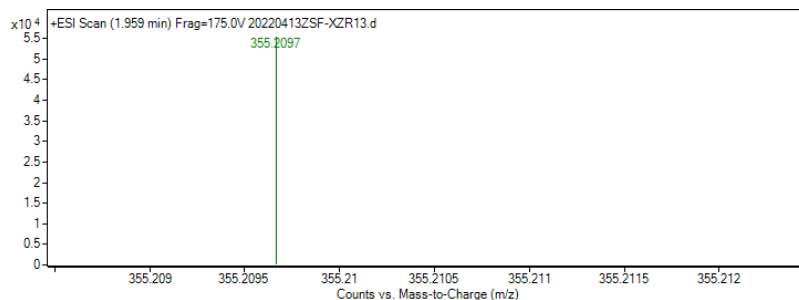

Resolution of enantiomers: DAICEL Chiralcel® ODH column, 2% IPA-Hexanes, 1.0 mL/min, 254 nm, RT<sub>1</sub> = 4.3 min, RT<sub>2</sub> = 5.1 min. [α]<sub>D</sub><sup>25</sup> = + 24.2 (c 0.5, CH<sub>2</sub>Cl<sub>2</sub>).

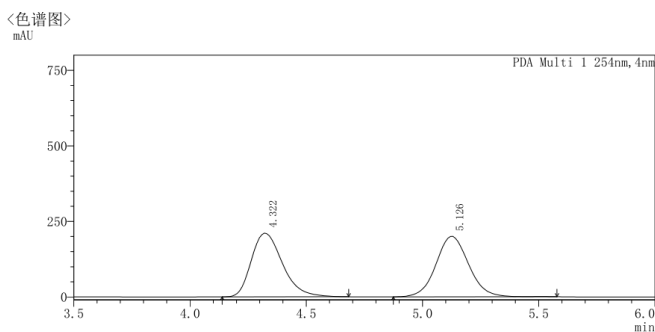

<峰表>

| 峰号 | 保留时间  | 面积      | 高度     | 化合物名 | 高度%     | 面积%     |
|----|-------|---------|--------|------|---------|---------|
| 1  | 4.322 | 1969433 | 210915 |      | 51.343  | 50.125  |
| 2  | 5.126 | 1959600 | 199884 |      | 48.657  | 49.875  |
| 总计 |       | 3929033 | 410799 |      | 100.000 | 100.000 |

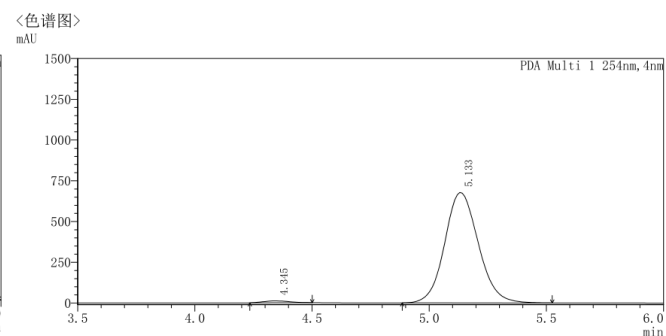

<峰表>

| 峰号 | 保留时间  | 面积      | 高度     | 化合物名 | 高度%     | 面积%     |
|----|-------|---------|--------|------|---------|---------|
| 1  | 4.345 | 92868   | 11496  |      | 1.668   | 1.350   |
| 2  | 5.133 | 6784705 | 677864 |      | 98.332  | 98.650  |
| 总计 |       | 6877572 | 689360 |      | 100.000 | 100.000 |

***N*-(((1*S*,6*aS*)-6*a*-((*Z*)-2-((*tert*-butyldimethylsilyl)oxy)vinyl)-6-oxo-6,6*a*-dihydrocyclopropa[*a*]inden-1*a*(1*H*)-yl)methyl)-*N*,4-dimethylbenzenesulfonamide (4i)**

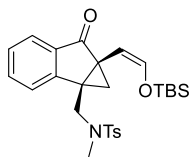

Colorless solid, M.P: 92-93 °C, 22.0 mg, 88%, >99% ee, purified by chromatography (PE/EA = 5/1, R<sub>f</sub> = 0.4); <sup>1</sup>H NMR (400 MHz, Chloroform-*d*) δ 7.84 (d, *J* = 7.7 Hz, 1H), 7.66 (dd, *J* = 10.7, 7.9 Hz, 3H), 7.53 (td, *J* = 7.5, 1.3 Hz, 1H), 7.38 – 7.26 (m, 4H), 6.45 (d, *J* = 5.9 Hz, 1H), 4.54 (d, *J* = 5.9 Hz, 1H), 3.67 (d, *J* = 13.6 Hz, 1H), 3.48 (d, *J* = 13.6 Hz, 1H), 2.70 (s, 3H), 2.44 (s, 3H), 1.90 (d, *J* = 4.4 Hz, 1H), 1.81 (d, *J* = 4.4 Hz, 1H), 0.74 (s, 9H), 0.06 (s, 3H), 0.02 (s, 3H). <sup>13</sup>C NMR (101 MHz, Chloroform-*d*) δ 201.5, 153.6, 144.2, 143.5, 134.1, 132.9, 129.8, 127.5, 127.2, 124.6, 124.5, 100.0, 48.9, 41.3, 39.7, 35.5, 34.5, 25.3, 21.5, 17.7, -5.48, -5.50. HRMS (ESI) [M+Na]<sup>+</sup> calculated for C<sub>27</sub>H<sub>35</sub>NO<sub>4</sub>SSiNa<sup>+</sup>: 520.1948, found 520.1950.

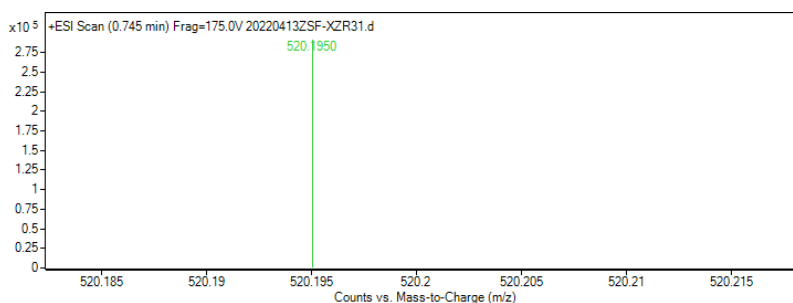

Resolution of enantiomers: DAICEL Chiralcel<sup>®</sup> ODH column, 4% IPA-Hexanes, 0.8 mL/min, 254 nm, RT<sub>1</sub> = 18.0 min, RT<sub>2</sub> = 19.6 min. [α]<sub>D</sub><sup>25</sup> = + 11.3 (c 0.5, CH<sub>2</sub>Cl<sub>2</sub>).

<色谱图>  
mAU

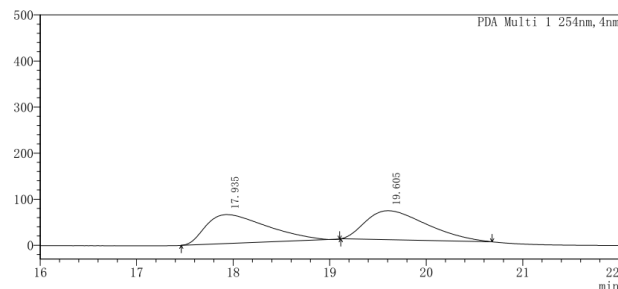

<峰表>

| 峰号 | 保留时间   | 面积      | 高度     | 化合物名 | 高度%     | 面积%     |
|----|--------|---------|--------|------|---------|---------|
| 1  | 17.935 | 2752179 | 62732  |      | 49.870  | 49.604  |
| 2  | 19.605 | 2796076 | 63058  |      | 50.130  | 50.396  |
| 总计 |        | 5548255 | 125789 |      | 100.000 | 100.000 |

<色谱图>  
mAU

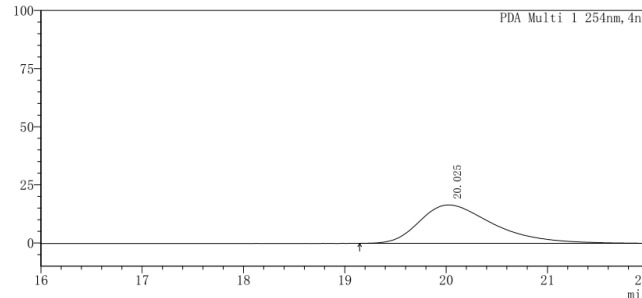

<峰表>

| 峰号 | 保留时间   | 面积     | 高度    | 化合物名 | 高度%     | 面积%     |
|----|--------|--------|-------|------|---------|---------|
| 1  | 20.025 | 838548 | 16505 |      | 100.000 | 100.000 |
| 总计 |        | 838548 | 16505 |      | 100.000 | 100.000 |

**(1*aS*,6*aS*)-6*a*-((*Z*)-2-((*tert*-butyldimethylsilyl)oxy)vinyl)-1*a*-((methoxymethoxy)methyl)-1*a*,6*a*-dihydrocyclopropa[*a*]inden-6(1*H*)-one(4j)**

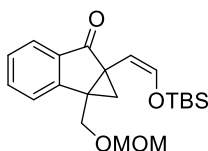

Yellow liquid, 10.9 mg, 58%, 82% ee, purified by chromatography (PE/EA = 5/1, R<sub>f</sub> = 0.4); <sup>1</sup>H NMR (400 MHz, Chloroform-*d*) δ 7.76 – 7.54 (m, 2H), 7.48 (td, *J* = 7.5, 1.2 Hz, 1H), 7.29 – 7.25 (m, 2H), 6.54 (d, *J* = 5.7 Hz, 1H), 4.73 (s, 2H), 4.67 (d, *J* = 5.7 Hz, 1H), 4.11 (dd, *J* = 11.0, 0.7 Hz, 1H), 3.94 (d, *J* = 11.0 Hz, 1H), 3.40 (s, 3H), 2.01 (d, *J* = 4.3 Hz, 1H), 1.82 (d, *J* = 4.3 Hz, 1H), 0.74 (s, 9H), 0.09 (s, 3H), 0.08 (s, 3H). <sup>13</sup>C NMR (101 MHz, Chloroform-*d*) δ 202.2, 155.0, 144.7, 133.7, 133.4, 126.9, 124.7, 123.4, 100.6, 96.5, 67.0, 55.4, 41.8, 39.6, 37.7, 25.2, 17.8, -5.4, -5.5. HRMS (ESI) [M+H]<sup>+</sup> calculated for C<sub>21</sub>H<sub>31</sub>O<sub>4</sub>Si<sup>+</sup>: 375.1985, found 375.1984.



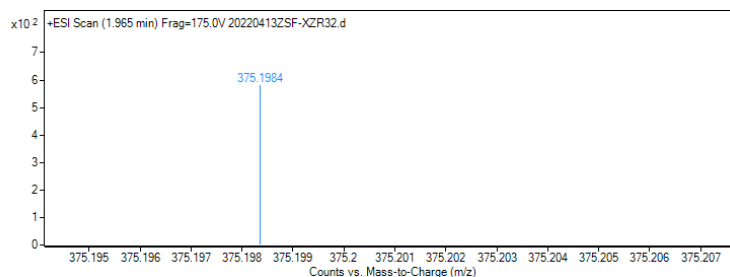

Resolution of enantiomers: DAICEL Chiralcel® ODH column, 2% IPA-Hexanes, 0.8 mL/min, 254 nm, RT<sub>1</sub> = 6.7 min, RT<sub>2</sub> = 7.8 min.  $[\alpha]_D^{25} = +10.9$  (c 0.5, CH<sub>2</sub>Cl<sub>2</sub>).

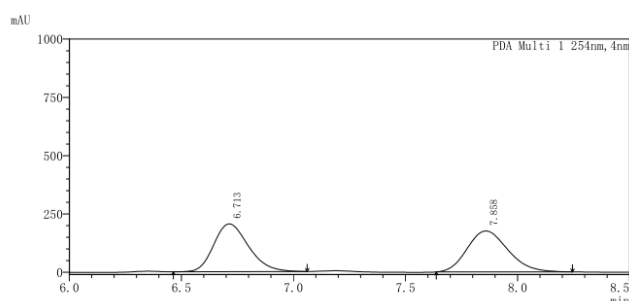

<峰表>

| 峰号 | 保留时间  | 面积      | 高度     | 化合物名 | 高度%     | 面积%     |
|----|-------|---------|--------|------|---------|---------|
| 1  | 6.713 | 2218867 | 204966 |      | 53.834  | 49.912  |
| 2  | 7.858 | 2226732 | 175770 |      | 46.166  | 50.088  |
| 总计 |       | 4445599 | 380736 |      | 100.000 | 100.000 |

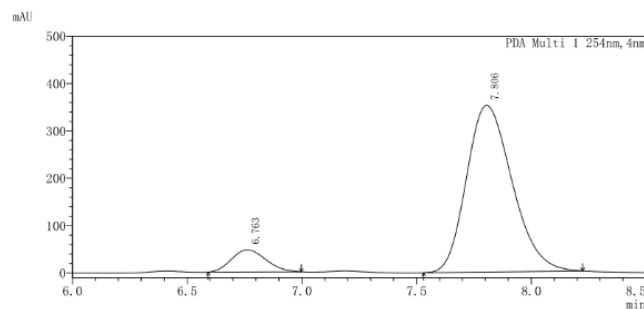

<峰表>

| 峰号 | 保留时间  | 面积      | 高度     | 化合物名 | 高度%     | 面积%     |
|----|-------|---------|--------|------|---------|---------|
| 1  | 6.763 | 484931  | 46701  |      | 11.708  | 9.051   |
| 2  | 7.806 | 4872654 | 352171 |      | 88.292  | 90.949  |
| 总计 |       | 5357585 | 398872 |      | 100.000 | 100.000 |

**(Z)-6a-(2-((tert-butyldimethylsilyloxy)vinyl)-1a-phenyl-1a,6a-dihydrocyclopropa[a]inden-6(1H)-one(4k)**

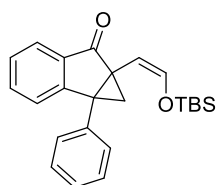

Yellow solid, M.P: 84-85 °C, 10.0 mg, 54%, 90% ee, purified by chromatography (PE/EA = 20/1, R<sub>f</sub> = 0.5); <sup>1</sup>H NMR (400 MHz, Chloroform-*d*) δ 7.92 (d, *J* = 7.5 Hz, 1H), 7.69 (d, *J* = 5.7 Hz, 0H), 7.66 – 7.59 (m, 6H), 7.58 – 7.52 (m, 4H), 7.32 (d, *J* = 7.7 Hz, 1H), 6.58 (d, *J* = 5.6 Hz, 1H), 4.60 (d, *J* = 5.6 Hz, 1H), 2.60 (d, *J* = 4.4 Hz, 1H), 2.30 (d, *J* = 4.4 Hz, 1H), 1.00 (s, 9H), 0.29 (s, 3H), 0.27 (s, 3H). <sup>13</sup>C NMR (126 MHz, Chloroform-*d*) δ 156.9, 144.4, 135.9, 133.7, 133.4, 130.1, 128.3, 127.4, 126.9, 124.7, 124.0,

100.8, 44.1, 42.8, 42.0, 25.3, 17.8, -5.37, -5.4. **HRMS** (ESI) [M+Na]<sup>+</sup> calculated for C<sub>24</sub>H<sub>28</sub>O<sub>2</sub>SiNa<sup>+</sup>: 399.1751, found 399.1742.

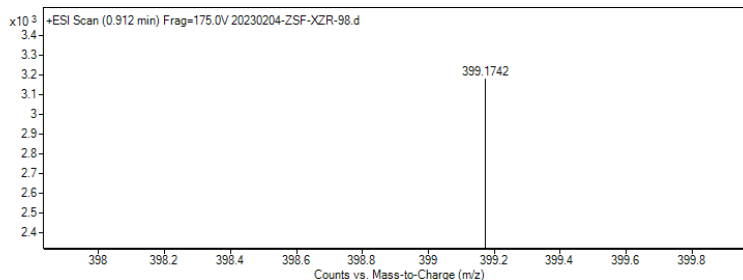

Resolution of enantiomers: DAICEL Chiralcel® ODH column, 2% IPA-Hexanes, 1.0 mL/min, 254 nm, RT<sub>1</sub> = 4.8 min, RT<sub>2</sub> = 6.4 min.  $[\alpha]_D^{25} = -2.0$  (c 0.5, CH<sub>2</sub>Cl<sub>2</sub>).

<色谱图>

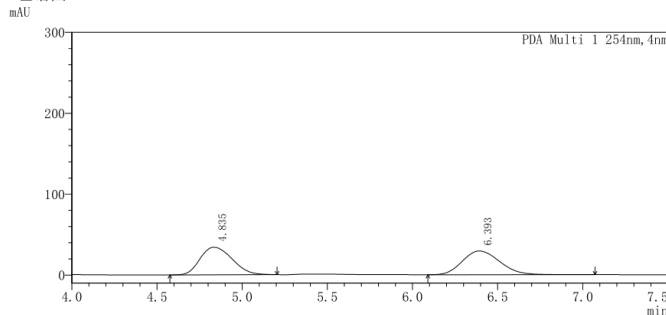

<峰表>

| 峰号 | 保留时间  | 面积     | 高度    | 化合物名 | 高度%     | 面积%     |
|----|-------|--------|-------|------|---------|---------|
| 1  | 4.835 | 449820 | 34130 |      | 53.780  | 49.937  |
| 2  | 6.393 | 450964 | 29333 |      | 46.220  | 50.063  |
| 总计 |       | 900784 | 63463 |      | 100.000 | 100.000 |

<色谱图>

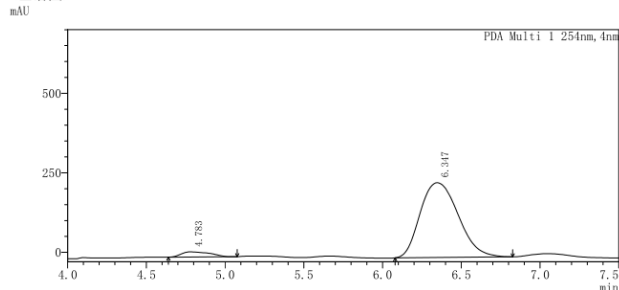

<峰表>

| 峰号 | 保留时间  | 面积      | 高度     | 化合物名 | 高度%     | 面积%     |
|----|-------|---------|--------|------|---------|---------|
| 1  | 4.783 | 205622  | 16259  |      | 6.467   | 4.931   |
| 2  | 6.317 | 3964346 | 235139 |      | 93.533  | 95.069  |
| 总计 |       | 4169969 | 251398 |      | 100.000 | 100.000 |

**(Z)-6a-(2-((tert-butyl)dimethylsilyloxy)vinyl)-1a-(4-methoxyphenyl)-1a,6a-dihydrocyclopropa[a]inden-6(1H)-one (4l)**

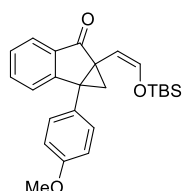

Yellow liquid, 7.1 mg, 35%, 76% ee, purified by chromatography (PE/EA = 10/1, R<sub>f</sub> = 0.5); <sup>1</sup>H NMR (400 MHz, Chloroform-*d*) δ 7.79 (d, *J* = 7.5 Hz, 1H), 7.56 – 7.46 (m, 1H), 7.37 (dd, *J* = 6.9, 1.8 Hz, 3H), 7.18 (d, *J* = 7.6 Hz, 1H), 6.97 (d, *J* = 8.7 Hz, 2H), 6.48 (d, *J* = 5.6 Hz, 1H), 4.49 (d, *J* = 5.6 Hz, 1H), 3.93 (s, 1H), 2.40 (d, *J* = 4.4 Hz, 1H), 2.16 (d, *J* = 4.4 Hz, 1H), 0.88 (s, 9H), 0.19 (s, 3H), 0.17 (s, 3H). <sup>13</sup>C NMR (126 MHz, Chloroform-*d*) δ 201.5, 162.2 (d, *J* = 245.9 Hz), 156.6, 144.4, 133.7, 133.3, 131.7 (d, *J* = 8.2 Hz), 127.0, 124.7, 123.9, 115.2 (d, *J* = 21.5 Hz), 100.8, 43.4, 42.6, 42.0, 25.3, 17.8, -5.4, -5.4. HRMS (ESI) [M+Na]<sup>+</sup> calculated for C<sub>25</sub>H<sub>30</sub>O<sub>3</sub>Si Na<sup>+</sup>: 429.1856, found 429.1856.

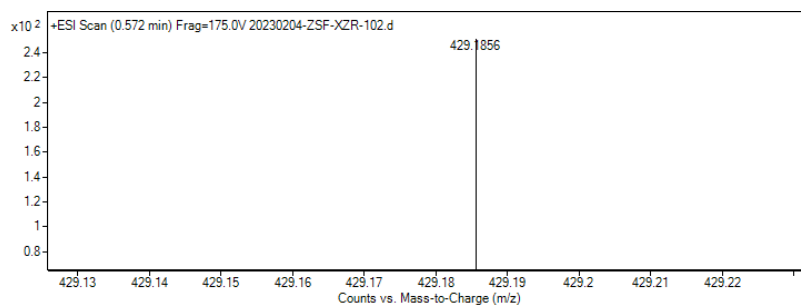

Resolution of enantiomers: DAICEL Chiralcel<sup>®</sup> ODH column, 2% IPA-Hexanes, 1.0 mL/min, 254 nm, RT<sub>1</sub> = 5.7 min, RT<sub>2</sub> = 7.2 min. [α]<sub>D</sub><sup>25</sup> = 4.0 (c 0.5, CH<sub>2</sub>Cl<sub>2</sub>).

<色谱图>

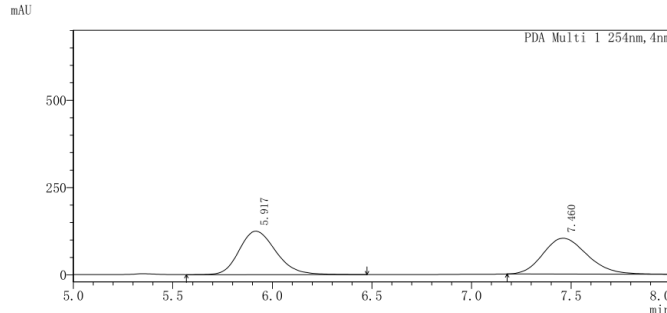

<峰表>

| 峰号 | 保留时间  | 面积      | 高度     | 化合物名 | 高度%     | 面积%     |
|----|-------|---------|--------|------|---------|---------|
| 1  | 5.917 | 1601352 | 124437 |      | 54.804  | 50.266  |
| 2  | 7.460 | 1584400 | 102624 |      | 45.196  | 49.734  |
| 总计 |       | 3185752 | 227061 |      | 100.000 | 100.000 |

<色谱图>

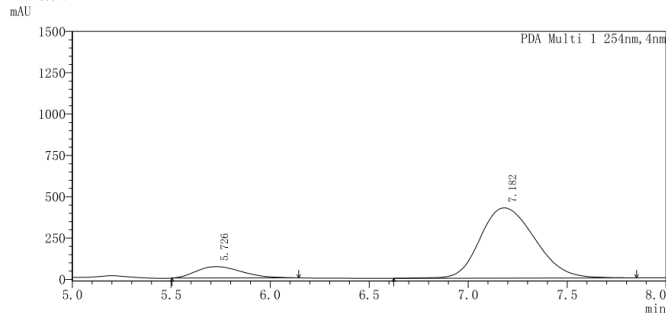

<峰表>

| 峰号 | 保留时间  | 面积      | 高度     | 化合物名 | 高度%     | 面积%     |
|----|-------|---------|--------|------|---------|---------|
| 1  | 5.726 | 1112847 | 69161  |      | 13.990  | 11.968  |
| 2  | 7.182 | 8185310 | 425190 |      | 86.010  | 88.032  |
| 总计 |       | 9298157 | 494351 |      | 100.000 | 100.000 |

**(Z)-6a-(2-((tert-butyl)dimethylsilyloxy)vinyl)-1a-(4-fluorophenyl)-1a,6a-dihydrocyclopropa[a]inden-6(1H)-one (4m)**

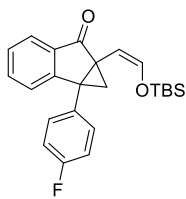

Yellow liquid, 5.4 mg, 27%, 75% ee, purified by chromatography (PE/EA = 20/1, R<sub>f</sub> = 0.5); <sup>1</sup>H NMR (500 MHz, Chloroform-*d*) δ 7.92 (d, *J* = 7.5 Hz, 1H), 7.73 – 7.59 (m, 1H), 7.54 (ddd, *J* = 9.5, 5.6, 3.0 Hz, 2H), 7.49 (d, *J* = 7.6 Hz, 1H), 7.29 (d, *J* = 7.6 Hz, 1H), 7.24 (t, *J* = 8.6 Hz, 2H), 6.59 (d, *J* = 5.7 Hz, 1H), 4.60 (d, *J* = 5.6 Hz, 1H), 2.54 (d, *J* = 4.4 Hz, 1H), 2.29 (d, *J* = 4.4 Hz, 1H), 0.99 (s, 9H), 0.30 (s, 3H), 0.28 (s, 3H). <sup>13</sup>C NMR (126 MHz, Chloroform-*d*) δ 201.5, 162.2 (d, *J* = 245.9 Hz), 156.6, 144.4, 133.7, 133.3, 131.7 (d, *J* = 8.2 Hz), 127.0, 124.7, 123.9, 115.2 (d, *J* = 21.5 Hz), 100.8, 43.4, 42.6, 42.0, 25.3, 17.8, -5.4, -5.4. <sup>19</sup>F NMR (471 MHz, Chloroform-*d*) δ -114.95. HRMS (ESI) [M+Na]<sup>+</sup> calculated for C<sub>24</sub>H<sub>27</sub>FO<sub>2</sub>SiNa<sup>+</sup>: 417.1656, found 417.1649.

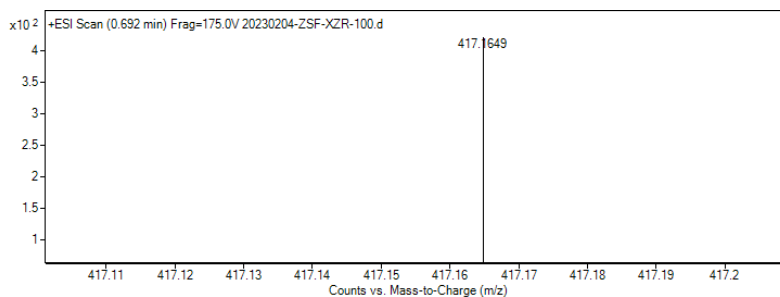

Resolution of enantiomers: DAICEL Chiralcel<sup>®</sup> ODH column, 1% IPA-Hexanes, 0.8 mL/min, 254 nm, RT<sub>1</sub> = 8.7 min, RT<sub>2</sub> = 12.4 min. [α]<sub>D</sub><sup>25</sup> = 3.0 (c 0.5, CH<sub>2</sub>Cl<sub>2</sub>).

<色谱图>

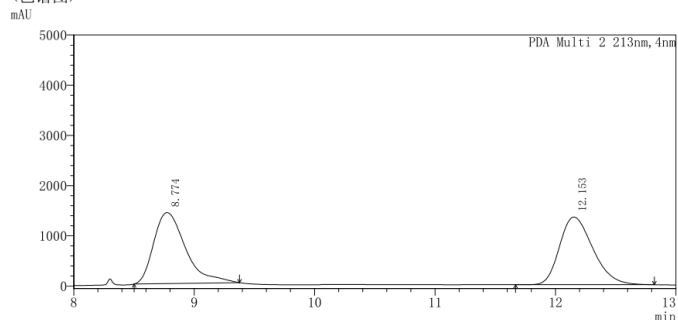

<峰表>

| 峰号 | 保留时间   | 面积       | 化合物名 | 高度%     | 面积%     |
|----|--------|----------|------|---------|---------|
| 1  | 8.774  | 26036772 |      | 51.207  | 50.027  |
| 2  | 12.153 | 26008367 |      | 48.793  | 49.973  |
| 总计 |        | 52045139 |      | 100.000 | 100.000 |

<色谱图>

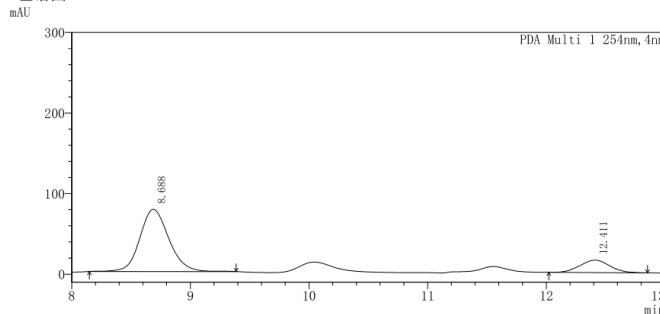

<峰表>

| 峰号 | 保留时间   | 面积      | 高度    | 化合物名 | 高度%     | 面积%     |
|----|--------|---------|-------|------|---------|---------|
| 1  | 8.688  | 1313465 | 77185 |      | 83.315  | 82.898  |
| 2  | 12.411 | 270966  | 15457 |      | 16.685  | 17.102  |
| 总计 |        | 1584431 | 92642 |      | 100.000 | 100.000 |

**(1aR,6aR)-6a-((Z)-2-((tert-butyldimethylsilyloxy)vinyl)-1a,6a-dihydrocyclopropa[a]inden-6(1H)-one (4n)**

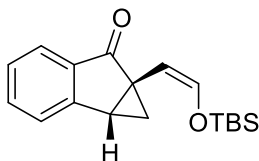

Yellow liquid, 2.6 mg, 17%, 81% ee, purified by chromatography (PE/EA = 20/1, R<sub>f</sub> = 0.5); <sup>1</sup>H NMR (400 MHz, Chloroform-*d*) δ 7.67 (d, *J* = 7.6 Hz, 1H), 7.47 (td, *J* = 7.4, 1.2 Hz, 1H), 7.41 (d, *J* = 7.4 Hz, 1H), 7.27 (td, *J* = 7.4, 1.1 Hz, 1H), 6.36 (d, *J* = 5.9 Hz, 1H), 5.01 (d, *J* = 6.0 Hz, 1H), 3.28 (dd, *J* = 7.0, 3.8 Hz, 1H), 2.02 (dd, *J* = 7.0, 3.7 Hz, 1H), 1.58 (t, *J* = 3.7 Hz, 1H), 0.85 (s, 9H), 0.12 (d, *J* = 1.7 Hz, 6H). <sup>13</sup>C NMR (101 MHz, Chloroform-*d*) δ 202.8, 154.5, 141.5, 133.5, 133.3, 126.6, 125.0, 124.0, 102.3, 40.2, 35.7, 30.0, 25.7, 25.4, 18.0, -5.45, -5.52. HRMS (ESI) [M+Na]<sup>+</sup> calculated for C<sub>18</sub>H<sub>24</sub>O<sub>2</sub>SiNa<sup>+</sup>: 301.1982, found 301.1983.

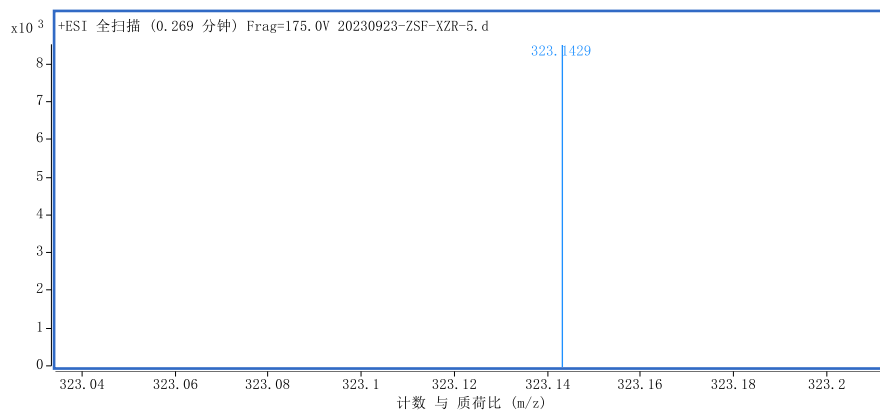

Resolution of enantiomers: Phenomenex INC column, 2% IPA-Hexanes, 0.8 mL/min, 254 nm,  $RT_1 = 11.0$  min,  $RT_2 = 12.0$  min.  $[\alpha]_D^{25} = +13$  (c 0.5,  $CH_2Cl_2$ ).

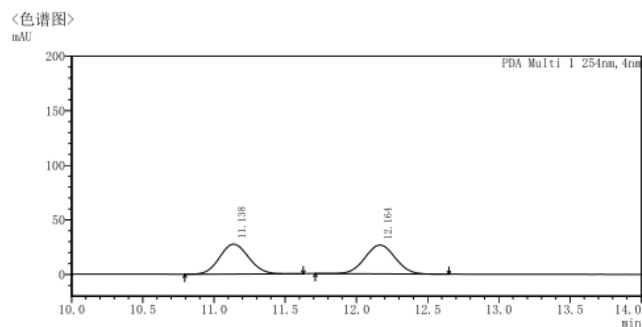

<峰表>

| 峰号 | 保留时间   | 面积     | 高度    | 化合物名 | 面积%     | 峰结束    |
|----|--------|--------|-------|------|---------|--------|
| 1  | 11.138 | 389075 | 27413 |      | 49.726  | 11.627 |
| 2  | 12.164 | 393364 | 26504 |      | 50.274  | 12.651 |
| 总计 |        | 782439 | 53918 |      | 100.000 |        |

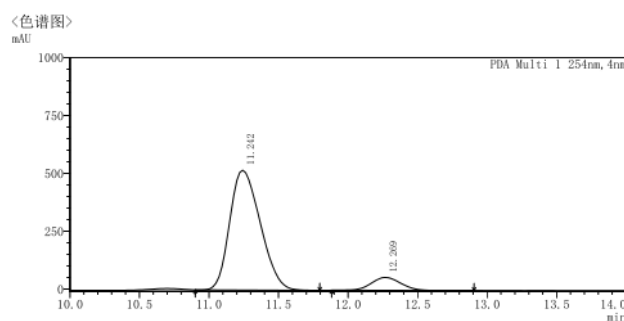

<峰表>

| 峰号 | 保留时间   | 面积      | 高度     | 化合物名 | 高度%     | 面积%     |
|----|--------|---------|--------|------|---------|---------|
| 1  | 11.242 | 7914177 | 517911 |      | 90.258  | 90.680  |
| 2  | 12.269 | 813388  | 55903  |      | 9.742   | 9.320   |
| 总计 |        | 8727565 | 573813 |      | 100.000 | 100.000 |

**(1aR,6aR)-6a-((Z)-2-((tert-butyldimethylsilyl)oxy)vinyl)-1,1-dimethyl-1a,6a-dihydrocyclopropa[a]inden-6(1H)-one(4o)**

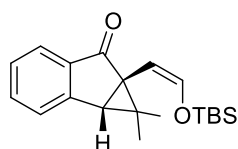

Yellow solid, 9.5 mg, 58%, 55% ee, purified by chromatography (PE/EA = 20/1,  $R_f = 0.4$ );  $^1H$  NMR (400 MHz, Chloroform- $d$ )  $\delta$  8.17 (d,  $J = 7.5$  Hz, 1H), 8.01 (td,  $J = 7.4, 1.2$  Hz, 1H), 7.91 (d,  $J = 7.5$  Hz, 1H), 7.80 (td,  $J = 7.4, 1.1$  Hz, 2H), 6.95 (d,  $J = 5.6$  Hz, 1H), 5.46 (d,  $J = 5.6$  Hz, 1H), 3.41 (s, 1H), 1.84 (s, 3H), 1.41 (s, 3H), 1.25 (s, 9H), 0.58 (s, 3H), 0.55 (s, 3H).  $^{13}C$  NMR (101 MHz,

Chloroform- $d$ )  $\delta$  202.8, 151.5, 143.0, 137.5, 133.4, 126.5, 125.4, 123.3, 102.2, 47.8, 44.8, 41.5, 25.3, 24.7, 17.8, 16.2, -5.46, -5.52. HRMS (ESI)  $[M+H]^+$  calculated for  $C_{20}H_{29}O_2Si^+$ : 329.1932, found 329.1939.

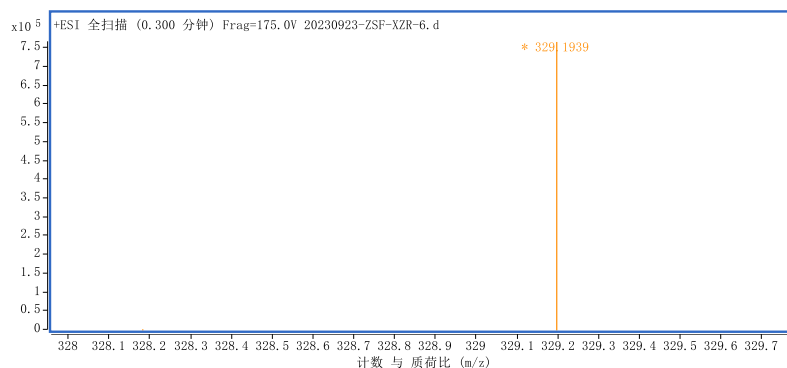

Resolution of enantiomers: Phenomenex INC column, 2% IPA-Hexanes, 0.8 mL/min, 254 nm, RT<sub>1</sub> = 7.4 min, RT<sub>2</sub> = 8.6 min.

[α]<sub>D</sub><sup>25</sup> = + 15.0 (c 0.5, CH<sub>2</sub>Cl<sub>2</sub>).

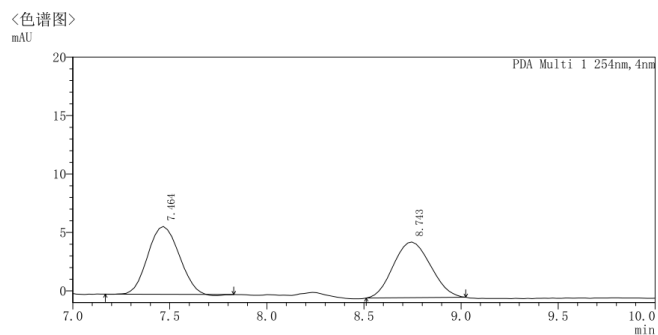

<峰表>  
PDA Ch1 254nm

| 峰号 | 保留时间  | 面积     | 高度    | 化合物名 | 高度%     | 面积%     |
|----|-------|--------|-------|------|---------|---------|
| 1  | 7.464 | 64907  | 5803  |      | 54.907  | 50.491  |
| 2  | 8.743 | 63644  | 4766  |      | 45.093  | 49.509  |
| 总计 |       | 128550 | 10568 |      | 100.000 | 100.000 |

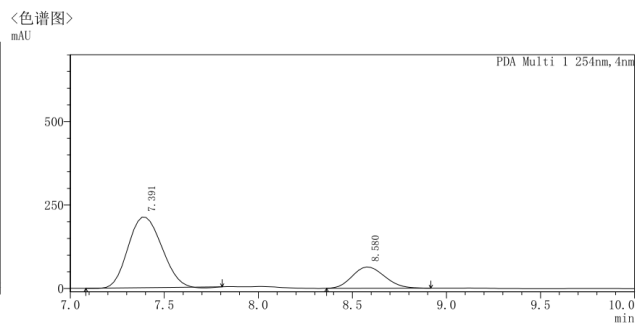

<峰表>  
PDA Ch1 254nm

| 峰号 | 保留时间  | 面积      | 高度     | 化合物名 | 高度%     | 面积%     |
|----|-------|---------|--------|------|---------|---------|
| 1  | 7.391 | 2624809 | 211542 |      | 76.836  | 77.419  |
| 2  | 8.580 | 765575  | 63775  |      | 23.164  | 22.581  |
| 总计 |       | 3390384 | 275317 |      | 100.000 | 100.000 |

## 5. Gram-scale reaction and synthetic applications

Procedure for gram-scale reaction: To a dichloromethane solution of **1g** (3.3 mmol, 30 mL) in Schlenk tube with a magnetic bar was added  $\text{Rh}_2(\text{S-TCPTTL})_4$  (1 mol%, 33.0 mg) at 30 °C under  $\text{N}_2$ . The sealed tube was then stirred at 30 °C under nitrogen atmosphere for 72 h. The mixture was then concentrated and the residue was purified by chromatography on silica gel (eluent: ethyl acetate/petroleum ether = 30:1) to afford the desired product **2g** (0.94 g, 86%, 94% ee).

### 5.1 The derivatization of cis-alkenyl substituted cyclopropane-fused indanone:

#### 1aR,6R,6aS)-6a-((Z)-2-((tert-butyldimethylsilyloxy)vinyl)-6-ethyl-4-fluoro-1a-methyl-1,1a,6,6a-tetrahydrocyclopropa[a]-inden-6-ol (**5a**)

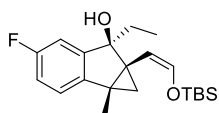

The substrates **2g** (33.2 mg, 94% ee, 0.1 mmol) was dissolved in THF (1 mL) at 0 °C,  $\text{EtMgBr}$  (3.0 equiv, 0.3 mmol, 1.0 mol/L) was added into the solution. After 2 h, the solvent was removed. Then the reaction mixture was purified by silica gel column chromatography to obtain the product **5a** (Yellow oil, 21.7 mg, dr > 20:1, 60%, 94 % ee, PE/EA = 5/1).

**$^1\text{H NMR}$**  (500 MHz, Chloroform-*d*)  $\delta$  7.06 (dd,  $J = 8.3, 4.9$  Hz, 1H), 6.89 (dd,  $J = 8.9, 2.5$  Hz, 1H), 6.87 – 6.80 (m, 1H), 6.46 (dd,  $J = 5.7, 1.0$  Hz, 1H), 4.69 (d,  $J = 5.7$  Hz, 1H), 3.62 (s, 1H), 1.93 (dq,  $J = 14.3, 7.3$  Hz, 1H), 1.86 – 1.73 (m, 1H), 1.45 – 1.40 (m, 3H), 1.29 – 1.24 (m, 1H), 1.10 (d,  $J = 3.9$  Hz, 1H), 0.96 (d,  $J = 1.1$  Hz, 9H), 0.72 (d,  $J = 3.9$  Hz, 1H), 0.51 – 0.38 (m, 3H), 0.26 – 0.17 (m, 6H).  **$^{13}\text{C NMR}$**  (126 MHz, Chloroform-*d*)  $\delta$  162.1 (d,  $J = 242.8$  Hz), 145.0 (d,  $J = 7.1$  Hz), 144.7 (d,  $J = 2.4$  Hz), 143.5, 121.6 (d,  $J = 8.3$  Hz), 114.1 (d,  $J = 22.5$  Hz), 111.3 (d,  $J = 22.4$  Hz), 105.6, 86.8 (d,  $J = 1.9$  Hz), 34.2, 33.8, 32.6, 31.7, 25.6, 18.3, 13.4, 9.0, -5.2, -5.5.  **$^{19}\text{F NMR}$**  (471 MHz, Chloroform-*d*)  $\delta$  -117.22. **HRMS** (ESI)  $[\text{M}+\text{Na}]^+$  calculated for  $\text{C}_{21}\text{H}_{31}\text{FO}_2\text{SiNa}^+$ : 385.1969, found 385.1978.

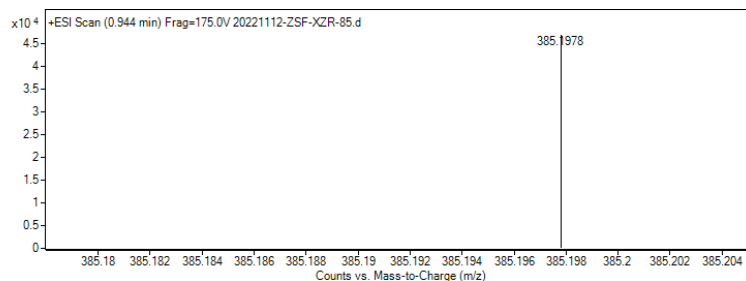

Resolution of enantiomers: Phenomenex INC column, 0.5% IPA-Hexanes, 0.5 mL/min, 254 nm,  $\text{RT}_1 = 10.6$  min,  $\text{RT}_2 = 11.0$  min.  $[\alpha]_{\text{D}}^{25} = +16.7$  (c 0.5,  $\text{CH}_2\text{Cl}_2$ ).

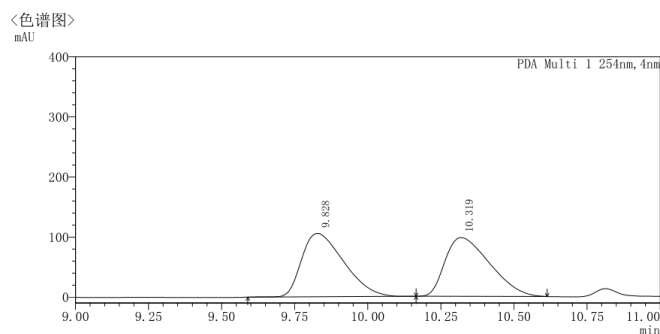

<峰表>

| 峰号 | 保留时间   | 面积      | 高度     | 化合物名 | 高度%     | 面积%     |
|----|--------|---------|--------|------|---------|---------|
| 1  | 9.828  | 1059058 | 105753 |      | 51.952  | 50.377  |
| 2  | 10.319 | 1043188 | 97806  |      | 48.048  | 49.623  |
| 总计 |        | 2102246 | 203560 |      | 100.000 | 100.000 |

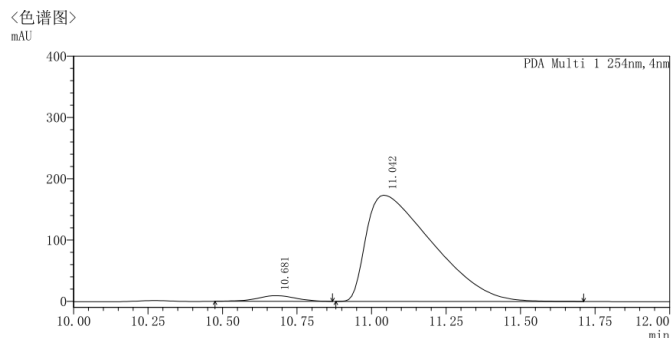

<峰表>

| 峰号 | 保留时间   | 面积      | 高度     | 化合物名 | 高度%     | 面积%     |
|----|--------|---------|--------|------|---------|---------|
| 1  | 10.681 | 83059   | 9215   |      | 5.048   | 2.999   |
| 2  | 11.042 | 2686619 | 173322 |      | 94.952  | 97.001  |
| 总计 |        | 2769677 | 182536 |      | 100.000 | 100.000 |

**(1aR,6R,6aS)-6a-((Z)-2-((tert-butyldimethylsilyloxy)vinyl)-4-fluoro-1a-methyl-6-vinyl-1,1a,6,6a-tetrahydrocyclopropa[a]inden-6-ol (5b)**

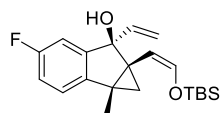

The substrates **2g** (33.2 mg, 94% ee, 0.1 mmol) was dissolved in THF (1 mL) at 0 °C, VinylMgBr (3.0 equiv, 0.3 mmol) was added into the solution. After 2 h, the solvent was removed. Then the reaction mixture was purified by silica gel column chromatography to obtain the product **5b** (Yellow oil, 32.8mg,

dr > 20:1, 91%, 95 % ee, PE/EA = 5/1).

<sup>1</sup>H NMR (500 MHz, Chloroform-*d*) δ 7.11 (dd, *J* = 8.3, 5.0 Hz, 1H), 6.86 (td, *J* = 8.7, 2.4 Hz, 1H), 6.80 (dd, *J* = 8.7, 2.5 Hz, 1H), 6.39 (d, *J* = 5.7 Hz, 1H), 5.91 (dd, *J* = 17.0, 10.5 Hz, 1H), 5.32 (d, *J* = 17.1 Hz, 1H), 5.02 (d, *J* = 10.5 Hz, 1H), 4.68 (d, *J* = 5.7 Hz, 1H), 3.65 (s, 1H), 1.47 (s, 3H), 1.22 (d, *J* = 4.0 Hz, 1H), 0.96 (s, 9H), 0.84 (d, *J* = 4.1 Hz, 1H), 0.21 (d, *J* = 7.9 Hz, 6H). <sup>13</sup>C NMR (126 MHz, Chloroform-*d*) δ 161.9 (d, *J* = 243.3 Hz), 145.2 (d, *J* = 7.2 Hz), 144.3 (d, *J* = 2.3 Hz), 143.3 (d, *J* = 9.6 Hz), 122.2 (d, *J* = 8.3 Hz), 114.4 (d, *J* = 22.6 Hz), 112.5 (d, *J* = 22.5 Hz), 110.9, 105.9, 86.4 (d, *J* = 2.1 Hz), 36.4, 32.7, 31.6, 29.7, 25.6, 18.3, 13.8, -5.1, -5.5. <sup>19</sup>F NMR (471 MHz, Chloroform-*d*) δ -117.29. HRMS (ESI) [M+Na]<sup>+</sup> calculated for C<sub>21</sub>H<sub>29</sub>FO<sub>2</sub>SiNa<sup>+</sup>: 383.1813, found 383.1820.

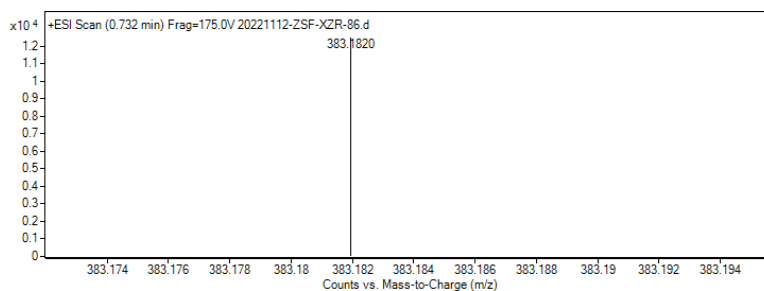

Resolution of enantiomers: Phenomenex INA column, 0.5% IPA-Hexanes, 0.5 mL/min, 254 nm, RT<sub>1</sub> = 9.9 min, RT<sub>2</sub> = 10.6 min. [α]<sub>D</sub><sup>25</sup> = -80.3 (c 0.5, CH<sub>2</sub>Cl<sub>2</sub>).

<色谱图>

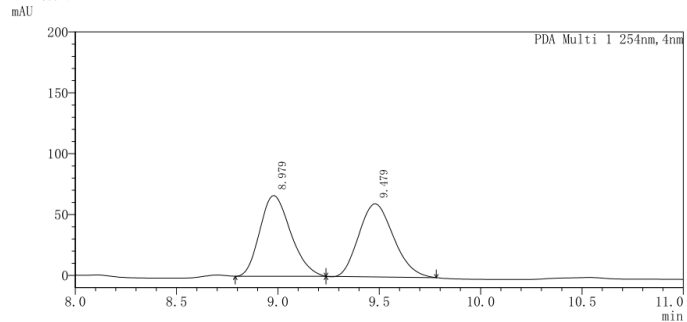

<峰表>

| 峰号 | 保留时间  | 面积      | 高度     | 化合物名 | 高度%     | 面积%     |
|----|-------|---------|--------|------|---------|---------|
| 1  | 8.979 | 702256  | 66352  |      | 52.516  | 49.558  |
| 2  | 9.479 | 714770  | 59995  |      | 47.484  | 50.442  |
| 总计 |       | 1417027 | 126347 |      | 100.000 | 100.000 |

<色谱图>

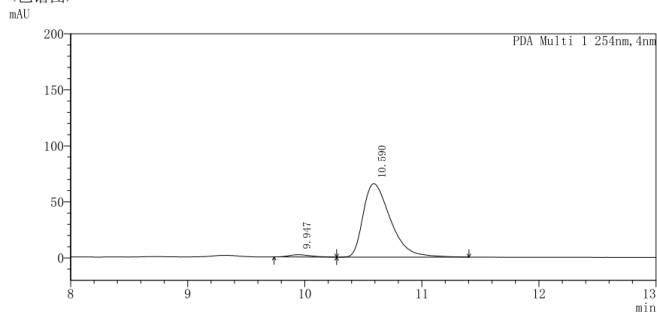

<峰表>

| 峰号 | 保留时间   | 面积      | 高度    | 化合物名 | 高度%     | 面积%     |
|----|--------|---------|-------|------|---------|---------|
| 1  | 9.947  | 26152   | 2019  |      | 2.985   | 2.397   |
| 2  | 10.590 | 1065068 | 65606 |      | 97.015  | 97.603  |
| 总计 |        | 1091220 | 67625 |      | 100.000 | 100.000 |

**(1aR,6S,6aS)-6a-((Z)-2-((tert-butyldimethylsilyloxy)vinyl)-4-fluoro-1a-methyl-1,1a,6,6a-tetrahydrocyclopropa[a]inden-6-ol (5c)<sup>[7]</sup>**

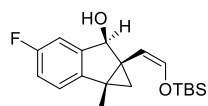

The substrates **2g** (33.2 mg, 94% ee, 0.1 mmol) and NaBH<sub>4</sub> (3.0 equiv, 1.0 mmol) were taken in 1mL MeOH at 0 °C. The reaction was monitored by TLC until disappearance of the starting material. Then the reaction mixture was purified by silica gel column chromatography to obtain the product **5c** (Yellow oil, 27.8 mg, dr = 3:1, 83%, 92% ee, PE/EA = 5/1).

<sup>1</sup>H NMR (400 MHz, Chloroform-*d*) δ 7.24 – 7.14 (m, 0.6H), 7.12 (dd, *J* = 8.2, 5.0 Hz, 1H), 6.99 (dd, *J* = 8.5, 2.5 Hz, 1H), 6.95 (dd, *J* = 8.7, 2.6 Hz, 0.3H), 6.89 (td, *J* = 8.7, 2.5 Hz, 1H), 6.51 (d, *J* = 6.0 Hz, 0.3H), 6.43 (d, *J* = 6.0 Hz, 1H), 5.58 (s, 1H), 4.92 (s, 0.3H), 4.65 (d, *J* = 5.9 Hz, 0.3H), 4.55 (d, *J* = 6.1 Hz, 1H), 3.37 (s, 0.3H), 3.11 (s, 1H), 1.51 (s, 1H), 1.47 (s, 3H), 1.08 (d, *J* = 4.3 Hz, 1H), 1.05 (d, *J* = 4.3 Hz, 0.3H), 0.95 (s, 9H), 0.90 (s, 3H), 0.81 (d, *J* = 4.3 Hz, 1H), 0.56 (d, *J* = 4.3 Hz, 0.3H), 0.22 (d, *J* = 2.7 Hz, 6H), 0.19 (d, *J* = 7.2 Hz, 2H). <sup>13</sup>C NMR (126 MHz, Chloroform-*d*) δ 162.0 (d, *J* = 242.8 Hz), 161.5 (d, *J* = 242.1 Hz), 145.0 (d, *J* = 7.4 Hz), 144.6 (d, *J* = 2.1 Hz), 144.6 (d, *J* = 2.5 Hz), 143.3 (d, *J* = 7.4 Hz), 142.0, 141.7, 122.3 (d, *J* = 8.5 Hz), 122.2 (d, *J* = 8.3 Hz), 114.9 (d, *J* = 22.6 Hz), 114.3 (d, *J* = 22.5 Hz), 112.9 (d, *J* = 22.1 Hz), 112.6 (d, *J* = 22.5 Hz), 107.9, 105.5, 80.0 (d, *J* = 2.1 Hz), 77.7 (d, *J* = 2.3 Hz), 38.3, 34.6, 33.8, 33.6, 33.5, 29.2, 25.6, 25.5, 18.3, 18.0, 14.9, 14.0, -5.2, -5.41, -5.42. <sup>19</sup>F NMR (471 MHz, Chloroform-*d*) δ -117.18, -117.76. HRMS (ESI) [M+Na]<sup>+</sup> calculated for C<sub>19</sub>H<sub>27</sub>FO<sub>2</sub>SiNa<sup>+</sup>: 357.1656, found 357.1664.

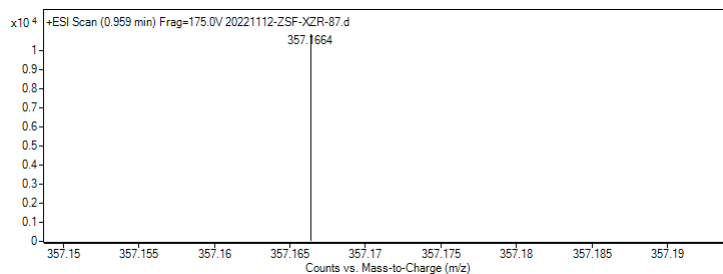

Resolution of enantiomers: DAICEL Chiralcel<sup>®</sup> ODH column, 2% IPA-Hexanes, 1.0 mL/min, 254 nm, RT<sub>1</sub> = 8.9 min, RT<sub>2</sub> = 10.2 min. [ $\alpha$ ]<sub>D</sub><sup>25</sup> = -5.8 (c 0.5, CH<sub>2</sub>Cl<sub>2</sub>).



<色谱图>

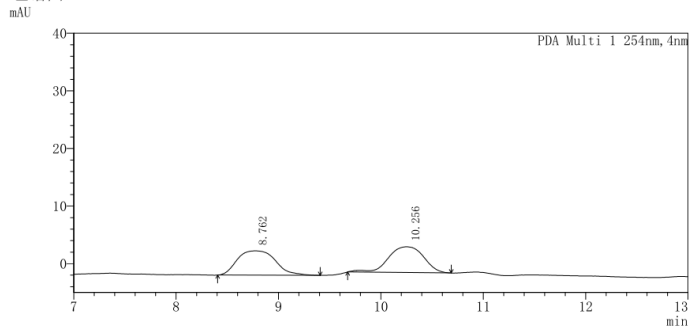

<峰表>

| 峰号 | 保留时间   | 面积     | 高度   | 化合物名 | 高度%     | 面积%     |
|----|--------|--------|------|------|---------|---------|
| 1  | 8.762  | 109560 | 4210 |      | 48.499  | 50.496  |
| 2  | 10.256 | 107407 | 4471 |      | 51.501  | 49.504  |
| 总计 |        | 216967 | 8681 |      | 100.000 | 100.000 |

<色谱图>

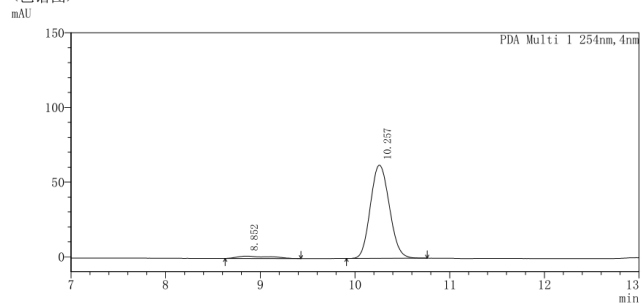

<峰表>

| 峰号 | 保留时间   | 面积     | 高度    | 化合物名 | 高度%     | 面积%     |
|----|--------|--------|-------|------|---------|---------|
| 1  | 8.852  | 37139  | 1486  |      | 2.324   | 4.090   |
| 2  | 10.257 | 870848 | 62454 |      | 97.676  | 95.910  |
| 总计 |        | 907987 | 63940 |      | 100.000 | 100.000 |

### Tert-butyl(((Z)-2-((1aR,6aR)-4-fluoro-1a-methyl-6-methylene-1a,6-dihydrocyclopropa[a]inden-6a(1H)-yl)vinyl)oxy)dimethylsilane (**5d**)<sup>[8]</sup>

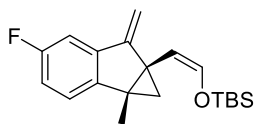

The  $\text{MePh}_3\text{PBr}$  (1.5 equiv, 1.0 mmol) was dissolved in THF (1 mL) at  $-78^\circ\text{C}$ , then  $n\text{-BuLi}$  (1.5 equiv, 0.15 mmol, 1.6 mol/L) was added dropwise. After 2 h, the substrates **2g** (33.2 mg, 94% ee, 0.1 mmol) in THF (1 mL) was added into the mixture. The reaction was monitored by TLC until disappearance of the starting material. Then the reaction mixture was purified by silica gel column chromatography to obtain the product **5d** (Colorless oil, 23.8 mg, 92%, 92% ee, PE/EA = 30/1).

$^1\text{H NMR}$  (500 MHz, Chloroform-*d*)  $\delta$  7.15 (dd,  $J = 8.3, 5.1$  Hz, 1H), 7.06 (dd,  $J = 9.1, 2.5$  Hz, 1H), 6.86 (td,  $J = 8.7, 2.5$  Hz, 1H), 6.45 (d,  $J = 6.0$  Hz, 1H), 5.44 (s, 1H), 5.15 (s, 1H), 4.56 (d,  $J = 5.9$  Hz, 1H), 1.56 (d,  $J = 4.1$  Hz, 1H), 1.45 (s, 3H), 0.92 (d,  $J = 4.0$  Hz, 1H), 0.84 (s, 9H), 0.12 (s, 3H), 0.11 (s, 3H).  $^{13}\text{C NMR}$  (126 MHz, Chloroform-*d*)  $\delta$  161.7 (d,  $J = 241.6$  Hz), 152.7 (d,  $J = 3.3$  Hz), 146.8 (d,  $J = 2.2$  Hz), 142.7, 140.0 (d,  $J = 7.9$  Hz), 122.8 (d,  $J = 8.7$  Hz), 114.4 (d,  $J = 22.9$  Hz), 107.8 (d,  $J = 22.8$  Hz), 105.5, 104.7, -5.4, -5.5.  $^{19}\text{F NMR}$  (471 MHz, Chloroform-*d*)  $\delta$  -118.26. HRMS (ESI)  $[\text{M}+\text{Na}]^+$  calculated for  $\text{C}_{20}\text{H}_{27}\text{FOSiNa}^+$ : 353.1707, found 353.1704.

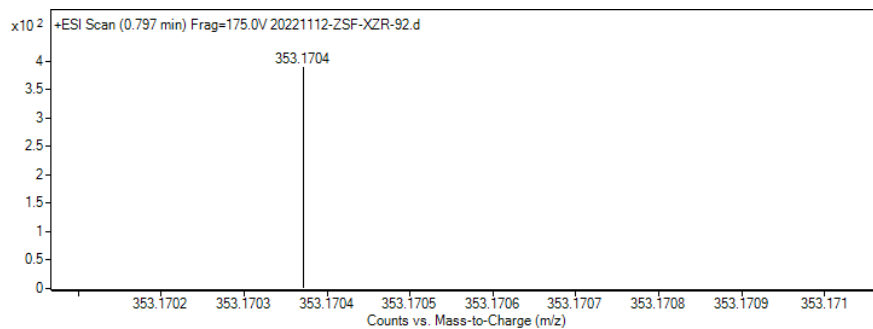

Resolution of enantiomers: DAICEL Chiralcel<sup>®</sup> ODH column, 2% IPA-Hexanes, 1.0 mL/min, 254 nm,  $\text{RT}_1 = 22.2$  min,  $\text{RT}_2 = 23.2$  min.  $[\alpha]_{\text{D}}^{25} = -11.3$  (c 0.5,  $\text{CH}_2\text{Cl}_2$ ).

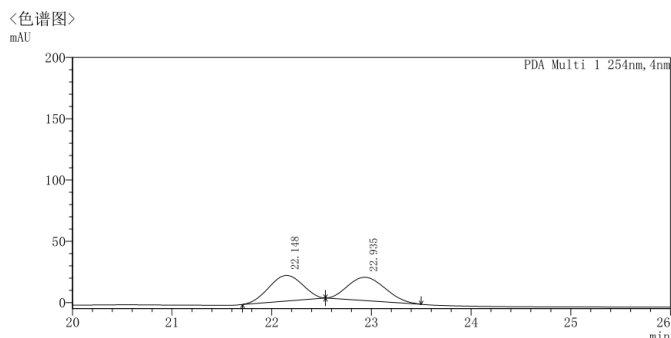

<峰表>  
PDA Ch1 254nm

| 峰号 | 保留时间   | 面积     | 高度    | 化合物名 | 高度%     | 面积%     |
|----|--------|--------|-------|------|---------|---------|
| 1  | 22.148 | 493064 | 20888 |      | 52.317  | 49.932  |
| 2  | 22.935 | 494402 | 19038 |      | 47.683  | 50.068  |
| 总计 |        | 987467 | 39926 |      | 100.000 | 100.000 |

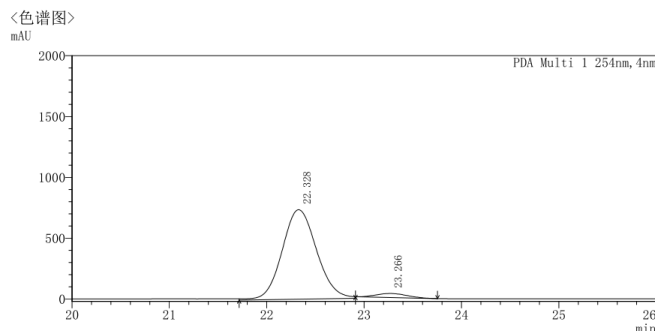

<峰表>  
PDA Ch1 254nm

| 峰号 | 保留时间   | 面积       | 高度     | 化合物名 | 高度%     | 面积%     |
|----|--------|----------|--------|------|---------|---------|
| 1  | 22.328 | 18176476 | 735634 |      | 95.710  | 96.135  |
| 2  | 23.266 | 730707   | 32975  |      | 4.290   | 3.865   |
| 总计 |        | 18907184 | 768608 |      | 100.000 | 100.000 |

**(1aR,6aS)-6a-(2-((tert-butyldimethylsilyloxy)ethyl)-4-fluoro-1a-methyl-1a,6a-dihydrocyclopropa[a]inden-6(1H)-one (5e) <sup>[9]</sup>**

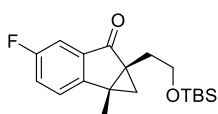

A flame dried reaction vessel was charged with 10% Pd/C (10 mol%), degassed and backfilled with hydrogen (1 atm). 1 mL EA were added and **2g** (33.2 mg, 94% ee, 0.1mmol) was introduced dropwise via syringe. The reaction was stirred at room temperature overnight. The reaction was monitored by

TLC until disappearance of the starting material. The mixture was purified by silica gel column chromatography to obtain the product **5e** (Colorless oil, 24.1 mg, 72%, 94% ee, PE/EA = 20/1).

**<sup>1</sup>H NMR** (500 MHz, Chloroform-*d*)  $\delta$  7.49 (dd,  $J = 8.3, 4.4$  Hz, 1H), 7.42 – 7.38 (m, 1H), 7.30 (td,  $J = 8.6, 2.6$  Hz, 1H), 4.06 (dt,  $J = 10.1, 7.2$  Hz, 1H), 3.91 (ddd,  $J = 10.0, 7.8, 5.7$  Hz, 1H), 2.46 (ddd,  $J = 13.7, 7.6, 5.7$  Hz, 1H), 2.02 (dt,  $J = 14.4, 7.2$  Hz, 1H), 1.78 (s, 3H), 1.64 (d,  $J = 4.1$  Hz, 1H), 1.39 (d,  $J = 4.9$  Hz, 2H), 0.96 (d,  $J = 0.9$  Hz, 8H), 0.14 (s, 3H), 0.12 (s, 3H). **<sup>13</sup>C NMR** (126 MHz, Chloroform-*d*)  $\delta$  202.9 (d,  $J = 2.7$  Hz), 161.9 (d,  $J = 246.4$  Hz), 152.9 (d,  $J = 2.3$  Hz), 135.1 (d,  $J = 7.0$  Hz), 123.5 (d,  $J = 7.9$  Hz), 120.5 (d,  $J = 23.4$  Hz), 110.7 (d,  $J = 22.4$  Hz), 60.8, 44.0, 39.7, 29.6, 25.9, 18.6, 13.0, -5.45, -5.46. **<sup>19</sup>F NMR** (471 MHz, Chloroform-*d*)  $\delta$  -115.55. **HRMS** (ESI)  $[M+Na]^+$  calculated for C<sub>19</sub>H<sub>27</sub>FO<sub>2</sub>SiNa<sup>+</sup>: 357.1656, found 357.1665.

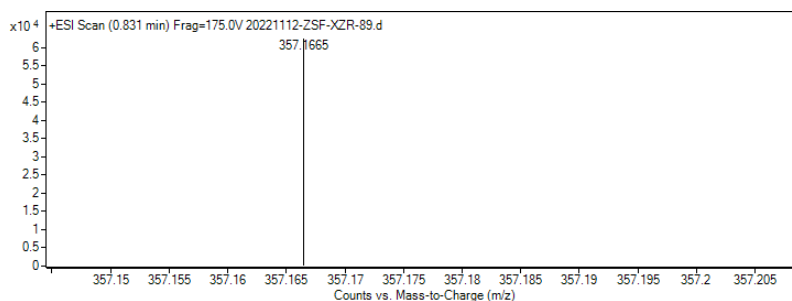

Resolution of enantiomers: DAICEL Chiralcel<sup>®</sup> ODH column, 0.5% IPA-Hexanes, 0.5 mL/min, 254 nm, RT<sub>1</sub> = 12.6 min, RT<sub>2</sub> = 14.3 min.  $[\alpha]_D^{25} = +14.0$  (c 0.5, CH<sub>2</sub>Cl<sub>2</sub>).

<色谱图>

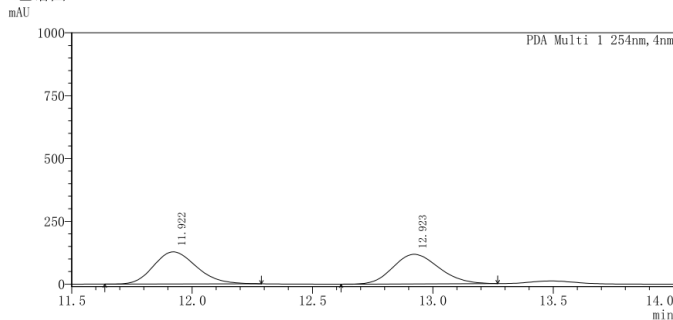

<峰表>

| 峰号 | 保留时间   | 面积      | 高度     | 化合物名 | 高度%     | 面积%     |
|----|--------|---------|--------|------|---------|---------|
| 1  | 11.922 | 1586696 | 127819 |      | 52.055  | 50.342  |
| 2  | 12.923 | 1565168 | 117726 |      | 47.945  | 49.658  |
| 总计 |        | 3151865 | 245545 |      | 100.000 | 100.000 |

<色谱图>

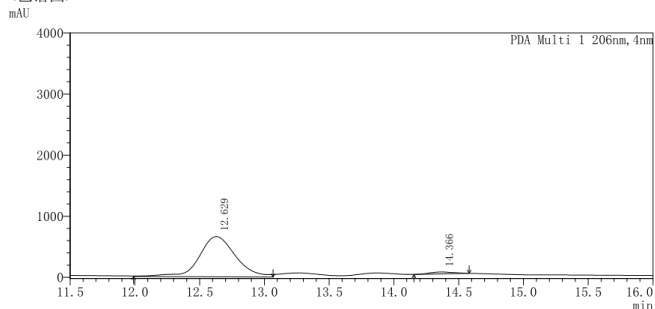

<峰表>

| 峰号 | 保留时间   | 面积       | 高度     | 化合物名 | 高度%     | 面积%     |
|----|--------|----------|--------|------|---------|---------|
| 1  | 12.629 | 12954787 | 661188 |      | 95.540  | 97.018  |
| 2  | 14.366 | 398170   | 30865  |      | 4.460   | 2.982   |
| 总计 |        | 13352957 | 692053 |      | 100.000 | 100.000 |

## 2-((1aR,6aS)-4-fluoro-1a-methyl-6-oxo-1a,6-dihydrocyclopropa[a]inden-6a(1H)-yl)acetaldehyde (**5f**)<sup>[10]</sup>

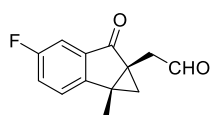

To an acetonitrile solution of **2g** (33.2mg, 94% ee, 0.1 mmol) in Schlenk tube with a magnetic bar was added  $\text{CuCl}_2$  (0.5 mmol, 5.0 equiv) and  $\text{H}_2\text{O}$  (0.5 mmol, 5.0 equiv) at 40 °C under  $\text{N}_2$ . The sealed tube was then stirred at 40 °C under nitrogen atmosphere overnight. After the reaction completed (monitored by TLC), it was diluted with water and extracted with EA. The combined organics were washed with brinem dried over anhydrous  $\text{Na}_2\text{SO}_4$  and concentrated in vacuo. The resulting residue was flash chromatographed on silica gel to afford the product **5f** (Yellow solid, MP: 98-100°C, 21.0 mg, 96%, 94% ee, PE/EA = 5/1).

**<sup>1</sup>H NMR** (500 MHz, Chloroform-*d*)  $\delta$  9.85 (s, 1H), 7.41 (dd,  $J$  = 8.3, 4.4 Hz, 1H), 7.31 (dd,  $J$  = 7.6, 2.5 Hz, 1H), 7.22 (td,  $J$  = 8.6, 2.6 Hz, 1H), 3.37 (d,  $J$  = 18.5 Hz, 1H), 2.68 (d,  $J$  = 18.5 Hz, 1H), 1.64 (d,  $J$  = 4.4 Hz, 1H), 1.58 (s, 3H), 1.27 (d,  $J$  = 4.5 Hz, 1H). **<sup>13</sup>C NMR** (126 MHz, Chloroform-*d*)  $\delta$  201.6 (d,  $J$  = 2.5 Hz), 199.1, 162.1 (d,  $J$  = 247.1 Hz), 152.4, 134.5 (d,  $J$  = 7.0 Hz), 123.8 (d,  $J$  = 7.9 Hz), 120.9 (d,  $J$  = 23.4 Hz), 111.2 (d,  $J$  = 22.5 Hz), 42.9, 41.3, 37.2, 31.3, 12.8. **<sup>19</sup>F NMR** (471 MHz, Chloroform-*d*)  $\delta$  -114.84. **HRMS** (ESI)  $[\text{M}+\text{Na}]^+$  calculated for  $\text{C}_{13}\text{H}_{11}\text{FO}_2\text{Na}^+$ : 241.0635, found 241.0635.

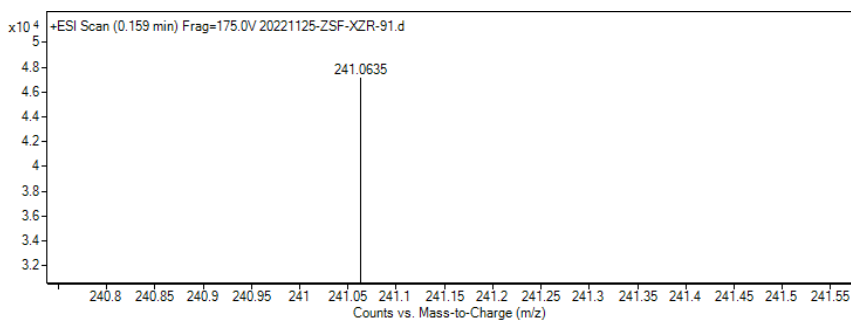

Resolution of enantiomers: DAICEL Chiralcel<sup>®</sup> NC column, 60% (W = 0.1%) Trisodium phosphate anhydrous-Acetonitrile, 0.5 mL/min, 254 nm,  $\text{RT}_1$  = 12.7 min,  $\text{RT}_2$  = 14.2 min.  $[\alpha]_D^{25}$  = -66.3(c 0.5,  $\text{CH}_2\text{Cl}_2$ ).

<色谱图>

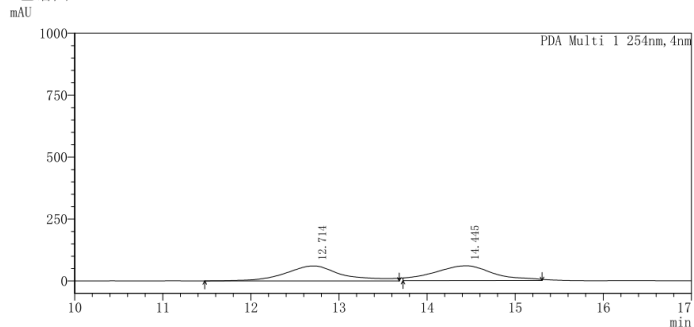

<峰表>

| 峰号 | 保留时间   | 面积      | 高度     | 化合物名 | 面积%     | 高度%     |
|----|--------|---------|--------|------|---------|---------|
| 1  | 12.714 | 2749392 | 60464  |      | 49.708  | 50.503  |
| 2  | 14.445 | 2781694 | 59259  |      | 50.292  | 49.497  |
| 总计 |        | 5531086 | 119722 |      | 100.000 | 100.000 |

<色谱图>

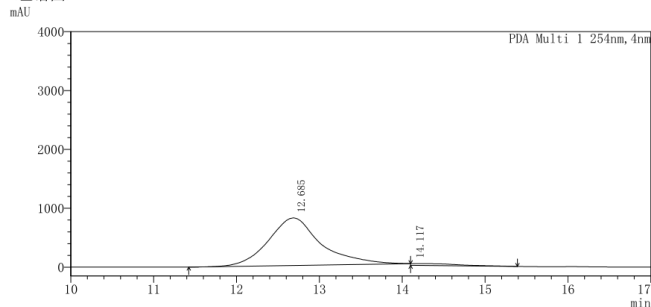

<峰表>

| 峰号 | 保留时间   | 面积       | 高度     | 化合物名 | 面积%     | 高度%     |
|----|--------|----------|--------|------|---------|---------|
| 1  | 12.685 | 35616708 | 806421 |      | 96.777  | 96.550  |
| 2  | 14.117 | 1185996  | 28815  |      | 3.223   | 3.450   |
| 总计 |        | 36802704 | 835236 |      | 100.000 | 100.000 |

**(1aR,6aS)-6a-((1S,2R)-2-((tert-butyldimethylsilyloxy)cyclopropyl)-4-fluoro-1a-methyl-1a,6a-dihydrocyclopropa[a]inden-6(1H)-one (5g) [11]**

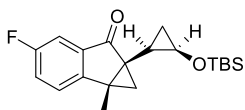

To a hexane solution of **2g** (33.2mg, 94% ee, 0.1 mmol) in Schlenk tube with a magnetic bar was added ZnEt<sub>2</sub> (0.22 mmol, 2.2 equiv) and CH<sub>2</sub>I<sub>2</sub> (0.22 mmol, 2.2 equiv) at 0 °C under N<sub>2</sub>. The sealed tube was then stirred at 0 °C under nitrogen atmosphere overnight. After the reaction completed

(monitored by TLC), it was diluted with water and extracted with Et<sub>2</sub>O. The combined organics were washed with brinem dried over anhydrous Na<sub>2</sub>SO<sub>4</sub> and concentrated in vacuo. The resulting residue was flash chromatographed on silica gel to afford the product **5f** (Yellow oil, 31.8 mg, 92%, dr = 2:1, major: 94% ee, minor: 92% ee, PE/EA = 20/1).

**<sup>1</sup>H NMR** (400 MHz, Chloroform-*d*) δ 7.44 (ddd, *J* = 8.2, 4.5, 1.1 Hz, 1.5H), 7.40 – 7.35 (m, 1H), 7.33 (dd, *J* = 7.7, 2.5 Hz, 0.5H), 7.25 (ddt, *J* = 11.0, 5.3, 2.5 Hz, 1.5H), 3.65 (tt, *J* = 6.5, 3.5 Hz, 1.5H), 1.93 (d, *J* = 3.8 Hz, 1H), 1.83 (s, 3H), 1.77 (s, 1.5H), 1.71 (d, *J* = 4.6 Hz, 1.5H), 1.47 (d, *J* = 3.5 Hz, 1H), 1.45 (d, *J* = 4.7 Hz, 0.5H), 1.35 – 1.27 (m, 1.5H), 1.08 – 0.94 (m, 3H), 0.85 (s, 9H), 0.74 (s, 4.5H), 0.15 (s, 3H), 0.15 (s, 3H), 0.12 (s, 1.5H), 0.09 (s, 1.5H). **<sup>13</sup>C NMR** (101 MHz, Chloroform-*d*) δ 203.8 (d, *J* = 2.6 Hz), 201.8 (d, *J* = 2.7 Hz), 161.8 (d, *J* = 246.0 Hz), 161.8 (d, *J* = 245.7 Hz), 152.9, 145.4, 135.9 (d, *J* = 7.1 Hz), 135.0 (d, *J* = 6.9 Hz), 123.2 (d, *J* = 6.1 Hz), 123.2 (d, *J* = 6.0 Hz), 120.2 (d, *J* = 23.4 Hz), 120.1 (d, *J* = 23.3 Hz), 50.0, 48.7, 44.7, 42.3, 41.2 (d, *J* = 1.4 Hz), 38.0 (d, *J* = 1.1 Hz), 33.5, 31.5, 25.5, 25.3, 17.8, 17.6, 14.6, 13.2, 12.9, 12.8, 11.3, 9.8, -5.06, -5.11, -5.4, -5.5. **<sup>19</sup>F NMR** (376 MHz, Chloroform-*d*) δ -115.94, -116.18. **HRMS** (ESI) [M+Na]<sup>+</sup> calculated for C<sub>20</sub>H<sub>27</sub>FO<sub>2</sub>SiNa<sup>+</sup>: 369.1656, found 369.1665.

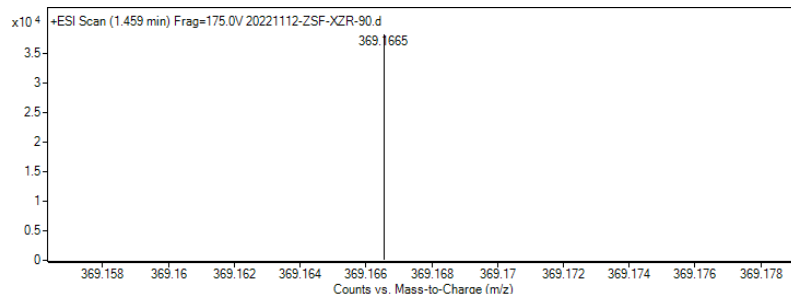

Resolution of enantiomers: DAICEL Chiralcel<sup>®</sup> IC column, 0.5% IPA-Hexanes, 0.5 mL/min, 254 nm, RT<sub>1</sub> = 10.4 min, RT<sub>2</sub> = 11.6 min, RT<sub>2</sub> = 22.5 min, RT<sub>2</sub> = 27.8 min. [α]<sub>D</sub><sup>25</sup> = + 5.3. (c 0.5, CH<sub>2</sub>Cl<sub>2</sub>).

<色谱图>

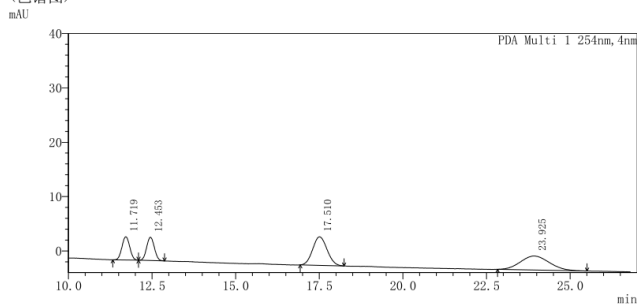

<峰表>

| 峰号 | 保留时间   | 面积     | 高度    | 化合物名 | 高度%     | 面积%     |
|----|--------|--------|-------|------|---------|---------|
| 1  | 11.719 | 68695  | 4262  |      | 26.051  | 15.300  |
| 2  | 12.453 | 68373  | 4273  |      | 26.116  | 15.229  |
| 3  | 17.510 | 156878 | 5239  |      | 32.017  | 34.941  |
| 4  | 23.925 | 155032 | 2588  |      | 15.817  | 34.530  |
| 总计 |        | 448978 | 16362 |      | 100.000 | 100.000 |

<色谱图>

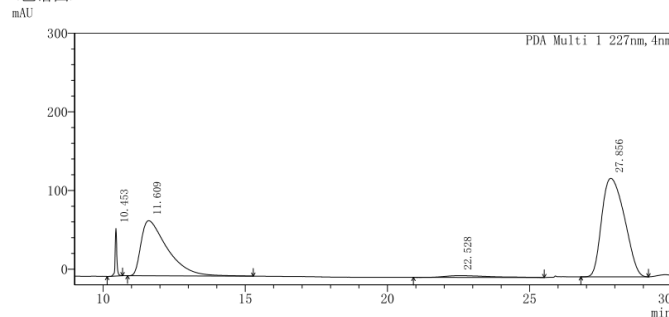

<峰表>

| 峰号 | 保留时间   | 面积       | 高度     | 化合物名 | 高度%     | 面积%     |
|----|--------|----------|--------|------|---------|---------|
| 1  | 10.453 | 241653   | 60501  |      | 23.442  | 2.022   |
| 2  | 11.609 | 4513272  | 70116  |      | 27.168  | 37.757  |
| 3  | 22.528 | 238974   | 2259   |      | 0.875   | 1.999   |
| 4  | 27.856 | 6959695  | 125210 |      | 48.515  | 58.223  |
| 总计 |        | 11953594 | 258086 |      | 100.000 | 100.000 |

### (1aR,6aR)-4-fluoro-1a-methyl-6-oxo-1a,6-dihydrocyclopropa[a]indene-6a(1H)-carbaldehyde(5h) [12]

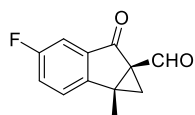

To a solution of **2g** (33.2mg, 94% ee, 0.1 mmol) in 1,2-dichloromethane(1 mL) was cooled to  $-78^{\circ}\text{C}$  and ozone was bubbled into the reaction mixture until a pale color was observed. The excess ozone was discharged by nitrogen stream for 5 min, and then dimethyl sulfide (30 uL, 0.4 mmol) and  $\text{CH}_2\text{Cl}_2$  were added. The mixture was stirred at room temperature for 6 h, and then saturated NaCl solution was added. The mixture was extracted with  $\text{CH}_2\text{Cl}_2$  and the organic phase was dried over anhydrous  $\text{NaSO}_4$ , filtered, and the solvent was removed by rotary evaporator. The resulting residue was flash chromatography (PE: EA = 5:1) on silica gel to afford the product **5h**. (Yellow solid, 15.1 mg, 74%, 97% ee, PE/EA = 5/1, M.P:  $80\text{-}81^{\circ}\text{C}$ ).

**$^1\text{H}$  NMR** (500 MHz, Chloroform-*d*)  $\delta$  10.29 (s, 1H), 7.43 (dd,  $J = 8.9, 4.3$  Hz, 1H), 7.38 (dt,  $J = 7.5, 2.0$  Hz, 1H), 7.28 (tt,  $J = 8.6, 2.0$  Hz, 1H), 2.35 (d,  $J = 4.1$  Hz, 1H), 2.08 (d,  $J = 4.1$  Hz, 1H), 1.75 (s, 3H).  **$^{13}\text{C}$  NMR** (126 MHz, Chloroform-*d*)  $\delta$  197.8 (d,  $J = 2.8$  Hz), 195.3, 162.6 (d,  $J = 248.9$  Hz), 150.1 (d,  $J = 2.5$  Hz), 134.4 (d,  $J = 7.4$  Hz), 124.3 (d,  $J = 8.0$  Hz), 121.7 (d,  $J = 23.5$  Hz), 111.3 (d,  $J = 22.7$  Hz), 49.9, 47.8, 44.6, 12.0.  **$^{19}\text{F}$  NMR** (471 MHz, Chloroform-*d*)  $\delta$  -112.77. **HRMS** (ESI)  $[\text{M}+\text{Na}]^+$  calculated for  $\text{C}_{12}\text{H}_9\text{FO}_2\text{Na}^+$ : 227.0479, found 227.0480.

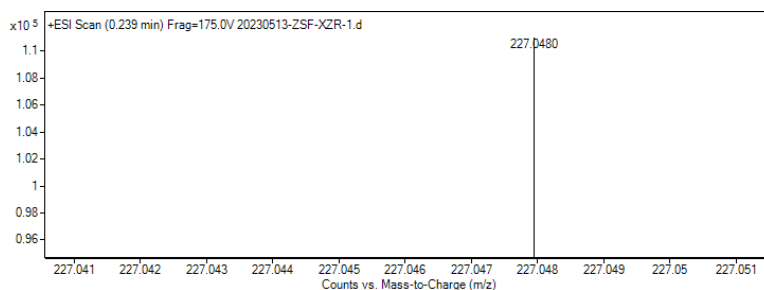

Resolution of enantiomers: DAICEL Chiralcel<sup>®</sup> ODH column, 2% IPA-Hexanes, 0.8 mL/min, 254 nm,  $\text{RT}_1 = 11.8$  min,  $\text{RT}_2 = 12.4$  min.  $[\alpha]_{\text{D}}^{25} = +16.5$ . (c 0.5,  $\text{CH}_2\text{Cl}_2$ ).

<色谱图>

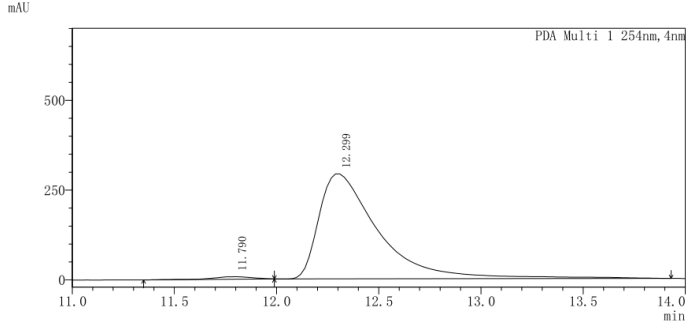

<峰表>

| 峰号 | 保留时间   | 面积      | 高度     | 化合物名 | 高度%     | 面积%     |
|----|--------|---------|--------|------|---------|---------|
| 1  | 11.790 | 95341   | 6931   |      | 2.320   | 1.579   |
| 2  | 12.299 | 5941547 | 291834 |      | 97.680  | 98.421  |
| 总计 |        | 6036887 | 298765 |      | 100.000 | 100.000 |

<色谱图>

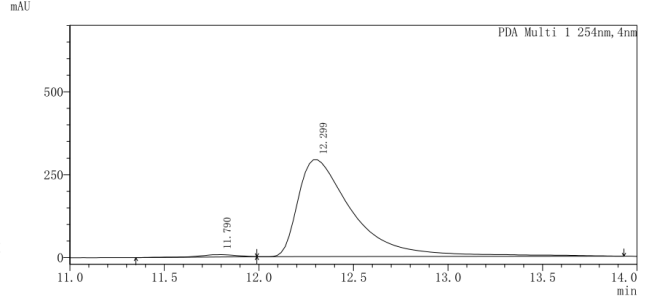

<峰表>

| 峰号 | 保留时间   | 面积      | 高度     | 化合物名 | 高度%     | 面积%     |
|----|--------|---------|--------|------|---------|---------|
| 1  | 11.790 | 95341   | 6931   |      | 2.320   | 1.579   |
| 2  | 12.299 | 5941547 | 291834 |      | 97.680  | 98.421  |
| 总计 |        | 6036887 | 298765 |      | 100.000 | 100.000 |

## 6. Rh-catalyzed preliminary experiments

### General procedure for Rh<sub>2</sub>(OPiv)<sub>4</sub>-catalyzed preliminary experiments:

To 1,2-dichloroethane solution of **1** (0.1 mmol, 1 mL) in Schlenk tube with a magnetic bar was added Rh<sub>2</sub>(OPiv)<sub>4</sub> (0.002 mmol, 2 mol%, 1.3 mg) at room temperature under N<sub>2</sub>. The sealed tube was then stirred at 30 °C under nitrogen atmosphere for 48 h. The mixture was then concentrated and the residue was purified by chromatography on silica gel to afford the desired product **2**.

### 2-(1a-methyl-6-oxo-1a,6-dihydrocyclopropa[a]inden-6a(1H)-yl)acetaldehyde(**2b**)

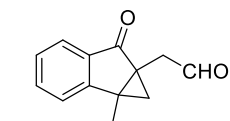

Colorless liquid, 7.0 mg, 35%, purified by chromatography (PE/EA = 5/1, R<sub>f</sub> = 0.6); <sup>1</sup>H NMR (400 MHz, Chloroform-*d*) δ 9.87 (s, 1H), 7.66 (dt, *J* = 7.6, 1.0 Hz, 1H), 7.52 (td, *J* = 7.4, 1.2 Hz, 1H), 7.45 (dt, *J* = 7.6, 1.0 Hz, 1H), 7.30 (td, *J* = 7.4, 1.1 Hz, 1H), 3.30 (dd, *J* = 18.2, 1.2 Hz, 1H), 2.70 (dd, *J* = 18.2, 1.4 Hz, 1H), 1.64 (d, *J* = 4.3 Hz, 1H), 1.60 (s, 3H), 1.27 (d, *J* = 4.3 Hz, 1H). <sup>13</sup>C NMR (101 MHz, Chloroform-*d*) δ 202.8, 199.5, 156.9, 134.0, 132.5, 127.1, 124.7, 122.5, 42.8, 41.1, 36.6, 31.6, 12.7. HRMS (ESI) [M+Na]<sup>+</sup> calculated for C<sub>13</sub>H<sub>12</sub>O<sub>2</sub>Na<sup>+</sup>: 223.0729, found 223.0722.

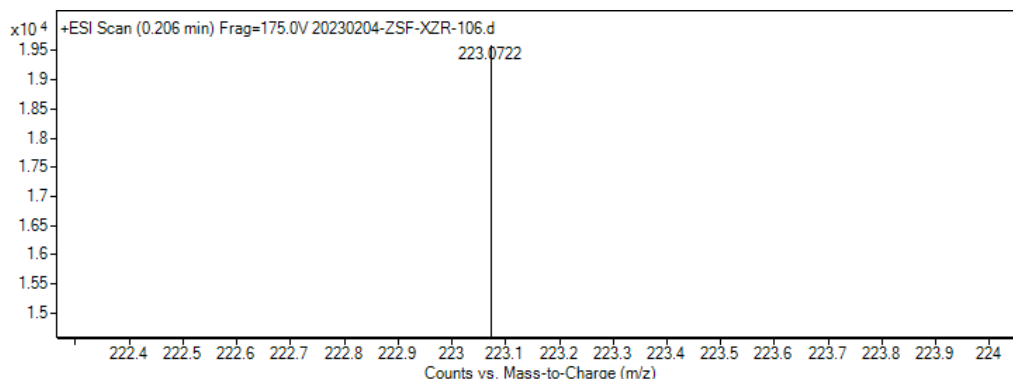

### (Z)-6a-(2-methoxyvinyl)-1a-methyl-1a,6a-dihydrocyclopropa[a]inden-6(1H)-one(**2c**)

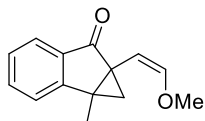

Colorless liquid, 10.1 mg, 47%, purified by chromatography (PE/EA = 2/1, R<sub>f</sub> = 0.5); <sup>1</sup>H NMR (500 MHz, Chloroform-*d*) δ 7.64 (d, *J* = 7.6 Hz, 1H), 7.48 (t, *J* = 7.4 Hz, 1H), 7.41 (d, *J* = 7.5 Hz, 1H), 7.26 (d, *J* = 6.3 Hz, 1H), 6.27 (d, *J* = 6.2 Hz, 1H), 4.49 (d, *J* = 6.2 Hz, 1H), 3.57 (s, 3H), 1.73 (d, *J* = 4.0 Hz, 1H), 1.68 (d, *J* = 4.0 Hz, 1H), 1.59 (s, 3H). <sup>13</sup>C NMR (126 MHz, Chloroform-*d*) δ 203.1, 157.3, 151.7, 133.5, 133.0, 126.6, 124.7, 122.3, 97.3, 60.0, 44.9, 40.3, 34.7, 12.9. HRMS (ESI) [M+H]<sup>+</sup> calculated for C<sub>14</sub>H<sub>14</sub>O<sub>2</sub>Si<sup>+</sup>: 215.1067, found 215.1058.

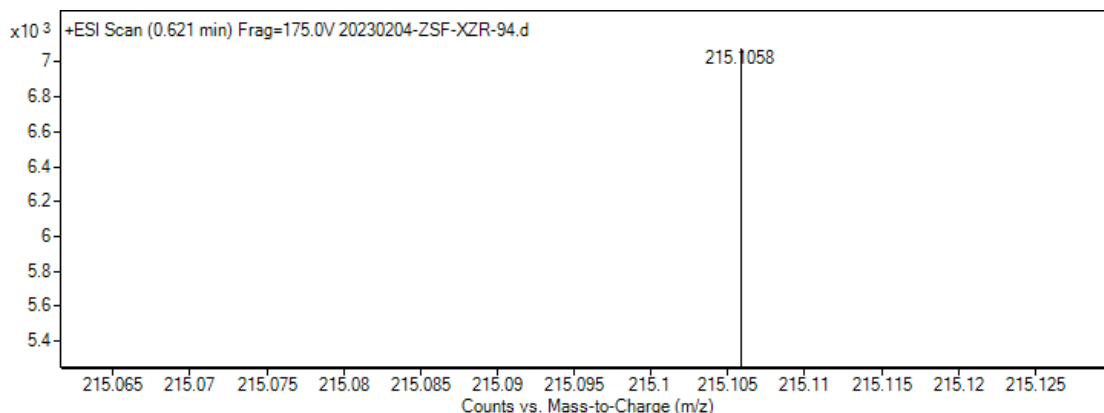

### (Z)-6a-(2-((tert-butyldimethylsilyloxy)vinyl)-1a-methyl-1a,6a-dihydrocyclopropa[a]inden-6(1H)-one(2d)

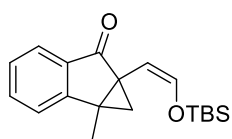

Yellow liquid, 23.6 mg, 75%, purified by chromatography (PE/EA = 20/1, R<sub>f</sub> = 0.4); <sup>1</sup>H NMR (500 MHz, Chloroform-*d*) δ 7.62 (d, *J* = 7.5 Hz, 1H), 7.46 (t, *J* = 7.4 Hz, 1H), 7.39 (d, *J* = 7.5 Hz, 1H), 7.24 (dd, *J* = 14.7, 7.3 Hz, 1H), 6.56 (d, *J* = 5.4 Hz, 1H), 4.62 (d, *J* = 5.5 Hz, 1H), 1.73 (d, *J* = 3.9 Hz, 1H), 1.67 (d, *J* = 4.0 Hz, 1H), 1.57 (s, 3H), 0.70 (s, 9H), 0.08 (s, 3H), 0.05 (s, 3H). <sup>13</sup>C NMR (126 MHz, Chloroform-*d*) δ 203.0, 157.4, 144.2, 133.4, 126.5, 124.5, 122.2, 101.0, 44.2, 40.4, 34.3, 25.2, 17.7, 13.1, -5.4, -5.5. HRMS (ESI) [M+H]<sup>+</sup> calculated for C<sub>19</sub>H<sub>27</sub>O<sub>2</sub>Si<sup>+</sup>: 315.1775, found 315.1781.

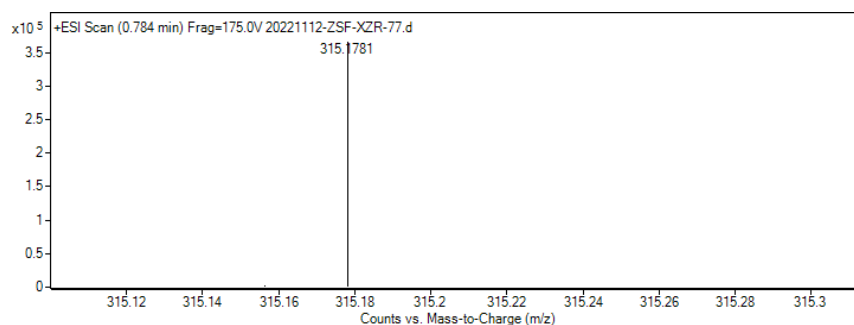

## 7. General procedure for mechanism experiments:

### A) Control experiments

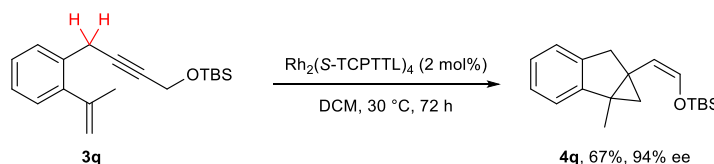

To 1,2-dichloromethane solution of substrate **3q** (0.05 mmol, 0.5 mL) in Schlenk tube with a magnetic bar was added Rh<sub>2</sub>(S-TCPTTL)<sub>4</sub> (0.01 mmol, 2 mol%, 2 mg), the catalyst was dissolved in dichloromethane) at 30 °C under N<sub>2</sub>. The sealed tube was then stirred at 30 °C under nitrogen atmosphere for 48-72 h. The mixture was then concentrated and the residue was purified by chromatography on silica gel (eluent: ethyl acetate/petroleum ether) to afford the desired product **4q**.

### Tert-butyldimethyl(((Z)-2-((1aS,6aS)-1a-methyl-1a,6-dihydrocyclopropa[a]inden-6a(1H)-yl)vinyl)oxy)silane (4q)

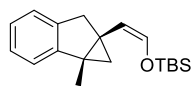

Yellow liquid, 10.1 mg, 67%, 94% ee, purified by chromatography (PE/EA = 50/1, R<sub>f</sub> = 0.5); <sup>1</sup>H NMR (400 MHz, Chloroform-*d*) δ 7.16 – 6.88 (m, 4H), 6.24 (d, *J* = 6.1 Hz, 1H), 4.39 (d, *J* = 6.1 Hz, 1H), 3.21 (d, *J* = 17.1 Hz, 1H), 3.05 (d, *J* = 17.1 Hz, 1H), 1.37 (s, 3H), 1.16 (d, *J* = 4.1 Hz, 1H), 0.81 (s, 9H), 0.46 (d, *J* = 4.1 Hz, 1H), 0.06 (s, 3H), 0.05 (s, 3H). <sup>13</sup>C NMR (101 MHz, Chloroform-*d*) δ 150.2, 141.7, 140.7, 125.6, 125.2, 124.8, 121.7, 109.4, 41.4, 35.7, 30.3, 30.0, 25.6, 18.1, 14.9, -5.38, -5.40. HRMS (ESI) [M+H]<sup>+</sup> calculated for C<sub>19</sub>H<sub>29</sub>O<sub>2</sub>Si<sup>+</sup>: 301.1982, found 301.1983.

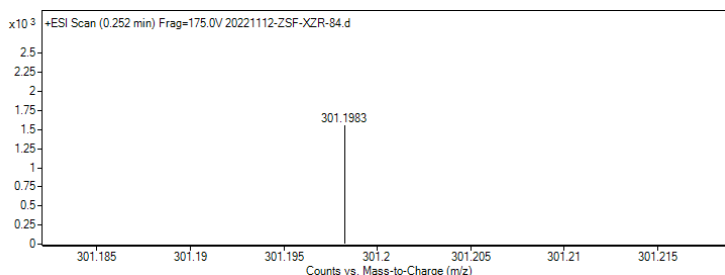



Resolution of enantiomers: DAICEL Chiralcel® OJH column, 0% IPA-Hexanes, 0.5 mL/min, 254 nm, RT<sub>1</sub> = 6.5 min, RT<sub>2</sub> = 6.8 min.  $[\alpha]_D^{25} = +46.0$  (c 0.5, CH<sub>2</sub>Cl<sub>2</sub>).

<色谱图>

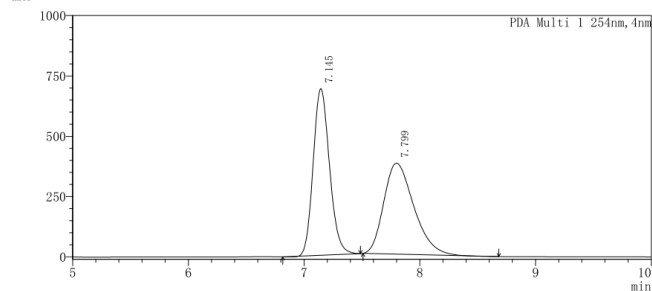

<峰表>

| 峰号 | 保留时间  | 面积       | 高度      | 化合物名 | 高度%     | 面积%     |
|----|-------|----------|---------|------|---------|---------|
| 1  | 7.145 | 6781669  | 691835  |      | 64.710  | 49.862  |
| 2  | 7.799 | 6819239  | 377295  |      | 35.290  | 50.138  |
| 总计 |       | 13600908 | 1069129 |      | 100.000 | 100.000 |

<色谱图>

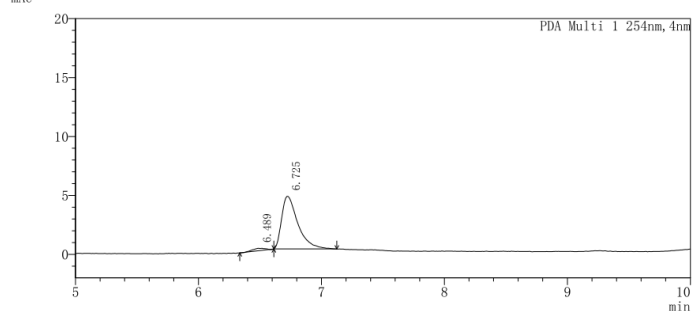

<峰表>

| 峰号 | 保留时间  | 面积    | 高度   | 化合物名 | 高度%     | 面积%     |
|----|-------|-------|------|------|---------|---------|
| 1  | 6.489 | 1361  | 200  |      | 4.280   | 3.223   |
| 2  | 6.725 | 40859 | 4464 |      | 95.720  | 96.777  |
| 总计 |       | 42220 | 4664 |      | 100.000 | 100.000 |

## B) Cooperative weak hydrogen bonding

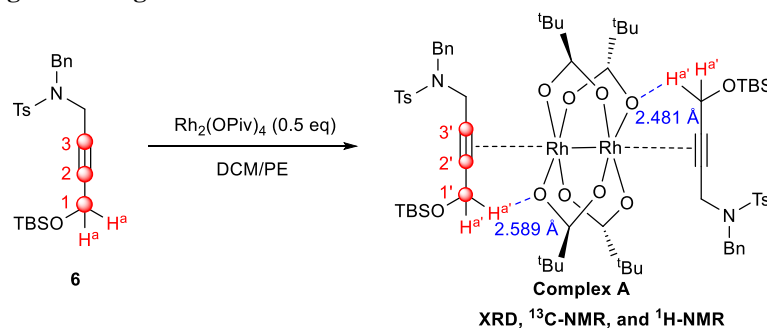

The substrate **6** (11.08 mg, 0.025 mmol) was mixed up with Rh<sub>2</sub>(OPiv)<sub>4</sub> (15.6 mg, 0.0125 mmol), the mixture was dissolved in DCM/PE (0.5mL: 0.5 mL) as mixed solvent. The resulting solution was subjected to sonication and Pasteur pipette filtration followed by slow evaporation of the solvent to yield the crystal of **complex A**, green prism.

The NMR spectrum of compound **6** and complex **A**

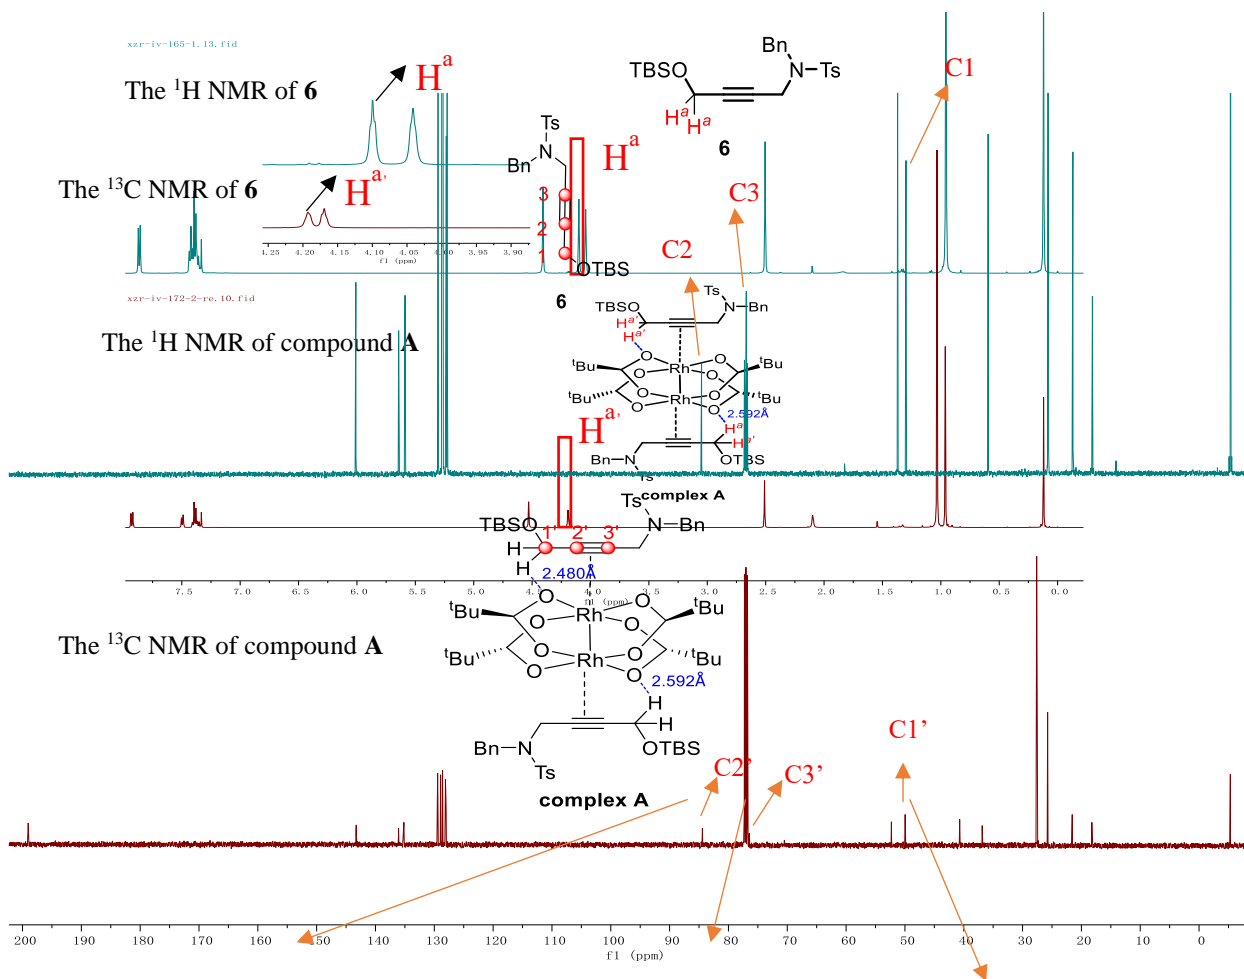

Figure S1. The NMR comparison between Compound 6 and complex A.

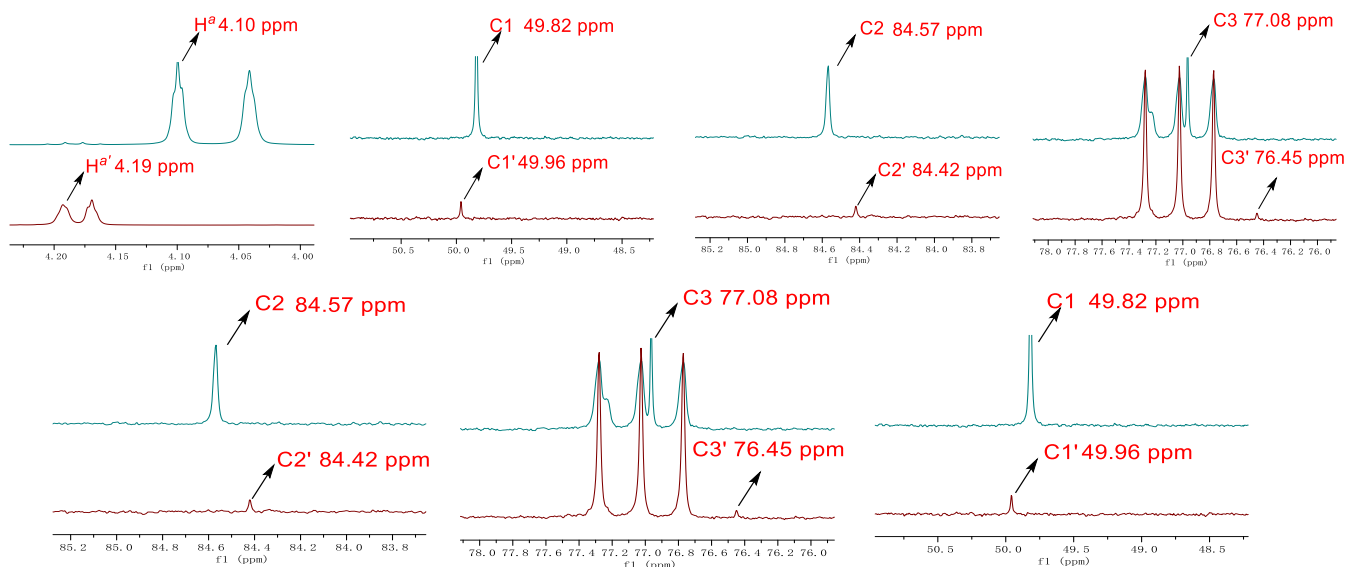

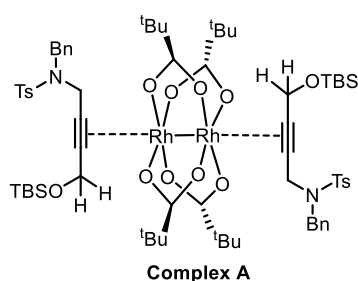

$^1\text{H}$  NMR (500 MHz, Chloroform-*d*)  $\delta$  7.96 – 7.90 (m, 2H), 7.55 – 7.47 (m, 2H), 7.43 – 7.34 (m, 4H), 4.53 (s, 2H), 4.19 (d,  $J = 2.0$  Hz, 2H), 4.17 (t,  $J = 1.9$  Hz, 2H), 2.51 (s, 3H), 1.03 (s, 18H), 0.96 (s, 9H), 0.12 (s, 6H).  $^{13}\text{C}$  NMR (126 MHz, Chloroform-*d*)  $\delta$  199.03, 136.08, 135.17, 129.44, 128.93, 128.60, 128.11, 127.99, 84.42, 76.45, 52.30, 49.96, 40.69, 36.86, 27.60, 25.74, 21.56, 18.23, -5.32.

### C) The origin of regioselectivity

#### (*Z*)-*tert*-butyldimethyl((2-(1*a*-methyl-1*a*,6-dihydrocyclopropa[*a*]inden-6*a*(1*H*)-yl)vinyl)oxy)silane (**4s**)

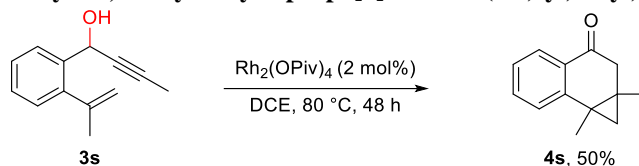

To 1,2-dichloroethane solution of substrate **3s** (0.1 mmol, 1 mL) in Schlenk tube with a magnetic bar was added  $\text{Rh}_2(\text{OPiv})_4$  (0.002 mmol, 2 mol%, 1.3 mg) at 30 °C under  $\text{N}_2$ , the catalyst was dissolved in dichloroethane, no product was observed. Then, elevating temperature to 80 °C for 48 h, the reaction proceeded smoothly. After the reaction completed, the mixture was then concentrated and the residue was purified by chromatography on silica gel (eluent: ethyl acetate/petroleum ether) to afford the desired product **4s**.

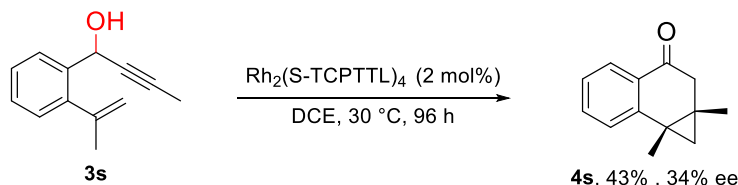

To 1,2-dichloromethane solution of substrate **3s** (0.1 mmol, 1 mL) in Schlenk tube with a magnetic bar was added  $\text{Rh}_2(\text{S-TCPTTL})_4$  (0.002 mmol, 2 mol%, 4.0 mg) at 30 °C under  $\text{N}_2$ , the catalyst was dissolved in dichloromethane, the reaction proceeded smoothly. After the reaction completed, the mixture was then concentrated and the residue was purified by chromatography on silica gel (eluent: ethyl acetate/petroleum ether) to afford the desired product **4s**.

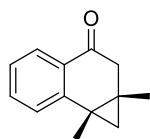

Yellow liquid, 8.0 mg, 43%, 34% ee, purified by chromatography (PE/EA = 10/1,  $R_f = 0.6$ );  $^1\text{H}$  NMR (400 MHz, Chloroform-*d*)  $\delta$  7.87 (dd,  $J = 7.7, 1.5$  Hz, 1H), 7.59 (dd,  $J = 7.9, 1.2$  Hz, 1H), 7.52 (td,  $J = 7.6, 1.6$  Hz, 1H), 7.30 – 7.20 (m, 1H), 2.96 (d,  $J = 17.4$  Hz, 1H), 2.71 (dd,  $J = 17.4, 1.2$  Hz, 1H), 1.61 (s, 3H), 1.40 (s, 3H), 0.95 (dd,  $J = 4.7, 1.2$  Hz, 1H), 0.44 (d,  $J = 4.7$  Hz, 1H).  $^{13}\text{C}$  NMR (101 MHz, Chloroform-*d*)  $\delta$  197.7, 149.9, 133.3, 130.5, 127.1, 125.8, 125.1, 44.4, 33.9, 23.2, 21.0, 21.0, 16.7. HRMS (ESI)  $[\text{M}+\text{H}]^+$  calculated for  $\text{C}_{13}\text{H}_{15}\text{O}^+$ : 187.1118, found 187.1109.

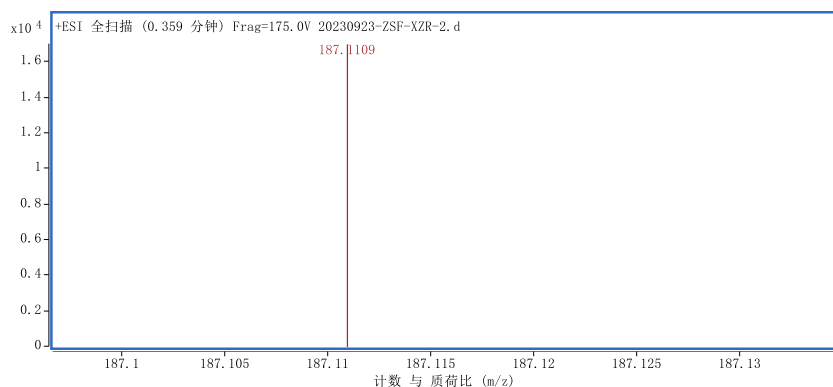

Resolution of enantiomers: Phenomenex INA column, 2% IPA-Hexanes, 0.3 mL/min, 254 nm,  $RT_1 = 18.2$  min,  $RT_2 = 19.0$  min.

<色谱图>

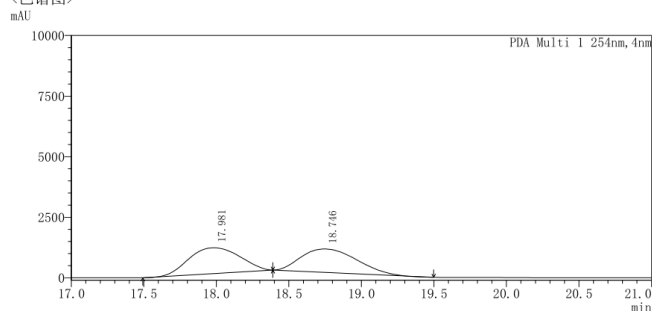

<峰表>

| 峰号 | 保留时间   | 面积       | 高度      | 化合物名 | 高度%     | 面积%     |
|----|--------|----------|---------|------|---------|---------|
| 1  | 17.981 | 26180828 | 1063958 |      | 52.347  | 50.364  |
| 2  | 18.746 | 25801877 | 968567  |      | 47.653  | 49.636  |
| 总计 |        | 51982705 | 2032525 |      | 100.000 | 100.000 |

<色谱图>

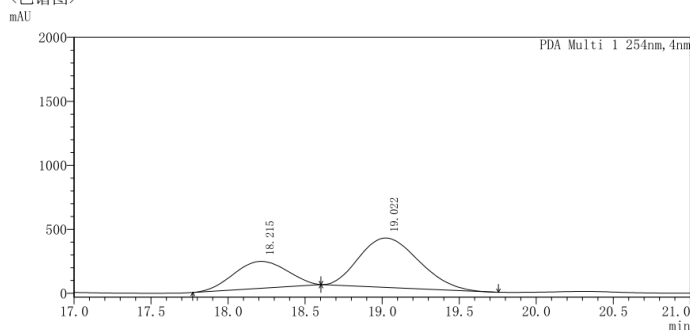

<峰表>

| 峰号 | 保留时间   | 面积       | 高度     | 化合物名 | 高度%     | 面积%     |
|----|--------|----------|--------|------|---------|---------|
| 1  | 18.215 | 5095661  | 210444 |      | 35.282  | 32.917  |
| 2  | 19.022 | 10384794 | 386012 |      | 64.718  | 67.083  |
| 总计 |        | 15480455 | 596457 |      | 100.000 | 100.000 |

## 2-(6-hydroxy-1a-methyl-1a,6-dihydrocyclopropa[a]inden-6a(1H)-yl)acetaldehyde (4t)

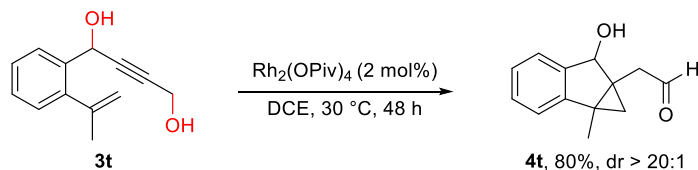

To 1,2-dichloroethane solution of substrate **3t** (0.1 mmol, 1 mL) in Schlenk tube with a magnetic bar was added  $\text{Rh}_2(\text{OPiv})_4$  (0.002 mmol, 2 mol%, 1.3 mg) at 30 °C for 48 h under  $\text{N}_2$ , the catalyst was dissolved in dichloroethane). After the reaction completed, the mixture was then concentrated and the residue was purified by chromatography on silica gel (eluent: ethyl acetate/petroleum ether) to afford the desired product **4t**.

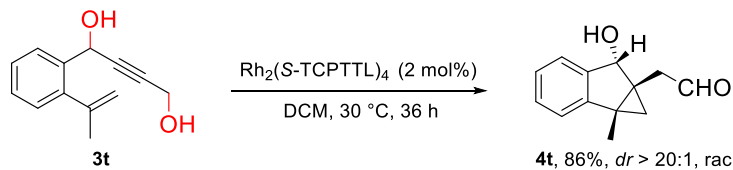

To 1,2-dichloromethane solution of substrate **3t** (0.1 mmol, 1 mL) in Schlenk tube with a magnetic bar was added  $\text{Rh}_2(\text{OPiv})_4$  (0.002 mmol, 2 mol%, 1.3 mg) at 30 °C for 36 h under  $\text{N}_2$ , the catalyst was dissolved in dichloromethane). After the reaction completed, the mixture was then concentrated and the residue was purified by chromatography on silica gel (eluent: ethyl acetate/petroleum ether) to afford the desired product **4t**.

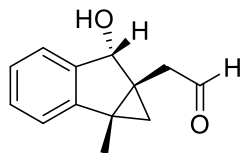

Yellow liquid, 17.4 mg, 86%, dr > 20:1, 0% ee purified by chromatography (PE/EA = 5/1, Rf = 0.5);  $^1\text{H NMR}$  (400 MHz, Chloroform- $d$ )  $\delta$  9.98 (d,  $J$  = 1.1 Hz, 1H), 7.32 – 7.17 (m, 5H), 5.33 (s, 1H), 2.94 (d,  $J$  = 18.6 Hz, 1H), 2.79 (dd,  $J$  = 18.7, 1.3 Hz, 1H), 1.50 (s, 3H), 1.07 (d,  $J$  = 4.8 Hz, 1H), 0.66 (d,  $J$  = 4.7 Hz, 1H).  $^{13}\text{C NMR}$  (101 MHz, Chloroform- $d$ )  $\delta$  203.1, 148.4, 141.3, 128.7, 126.6, 125.5, 121.8, 80.1, 47.0, 32.4, 30.6, 27.5, 13.9. HRMS (ESI)  $[\text{M}+\text{Na}]^+$  calculated for  $\text{C}_{13}\text{H}_{14}\text{ONa}^+$ : 225.0886, found 225.0890.

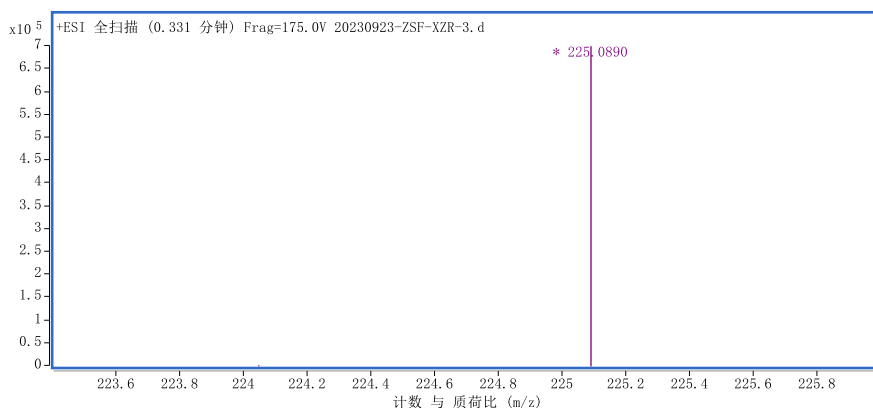

Resolution of enantiomers: Phenomenex INA column, 15% IPA-Hexanes, 0.5 mL/min, 254 nm,  $\text{RT}_1 = 7.6$  min,  $\text{RT}_2 = 8.1$  min.

<色谱图>

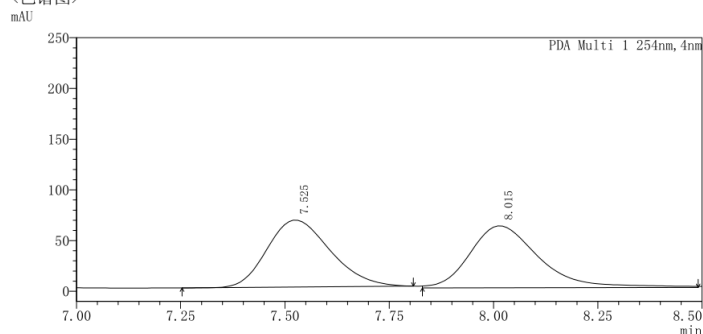

<峰表>

| 峰号 | 保留时间  | 面积      | 高度     | 浓度    | 高度%     | 面积%     |
|----|-------|---------|--------|-------|---------|---------|
| 1  | 7.525 | 697123  | 65966  | 0.000 | 51.927  | 49.656  |
| 2  | 8.015 | 706785  | 61070  | 0.000 | 48.073  | 50.344  |
| 总计 |       | 1403907 | 127036 |       | 100.000 | 100.000 |

<色谱图>

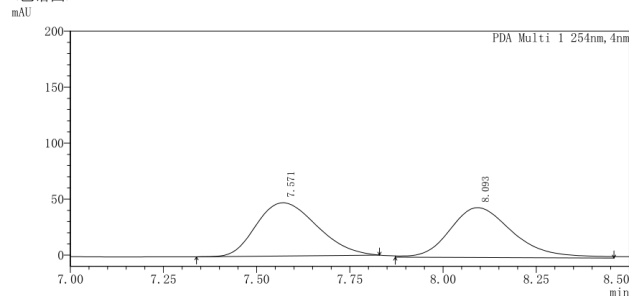

<峰表>

| 峰号 | 保留时间  | 面积      | 高度    | 浓度    | 浓度单位 | 高度%     | 面积%     |
|----|-------|---------|-------|-------|------|---------|---------|
| 1  | 7.571 | 538331  | 47554 | 0.000 |      | 51.599  | 50.467  |
| 2  | 8.093 | 528359  | 44606 | 0.000 |      | 48.401  | 49.533  |
| 总计 |       | 1066689 | 92160 |       |      | 100.000 | 100.000 |

# The NOE of 4t

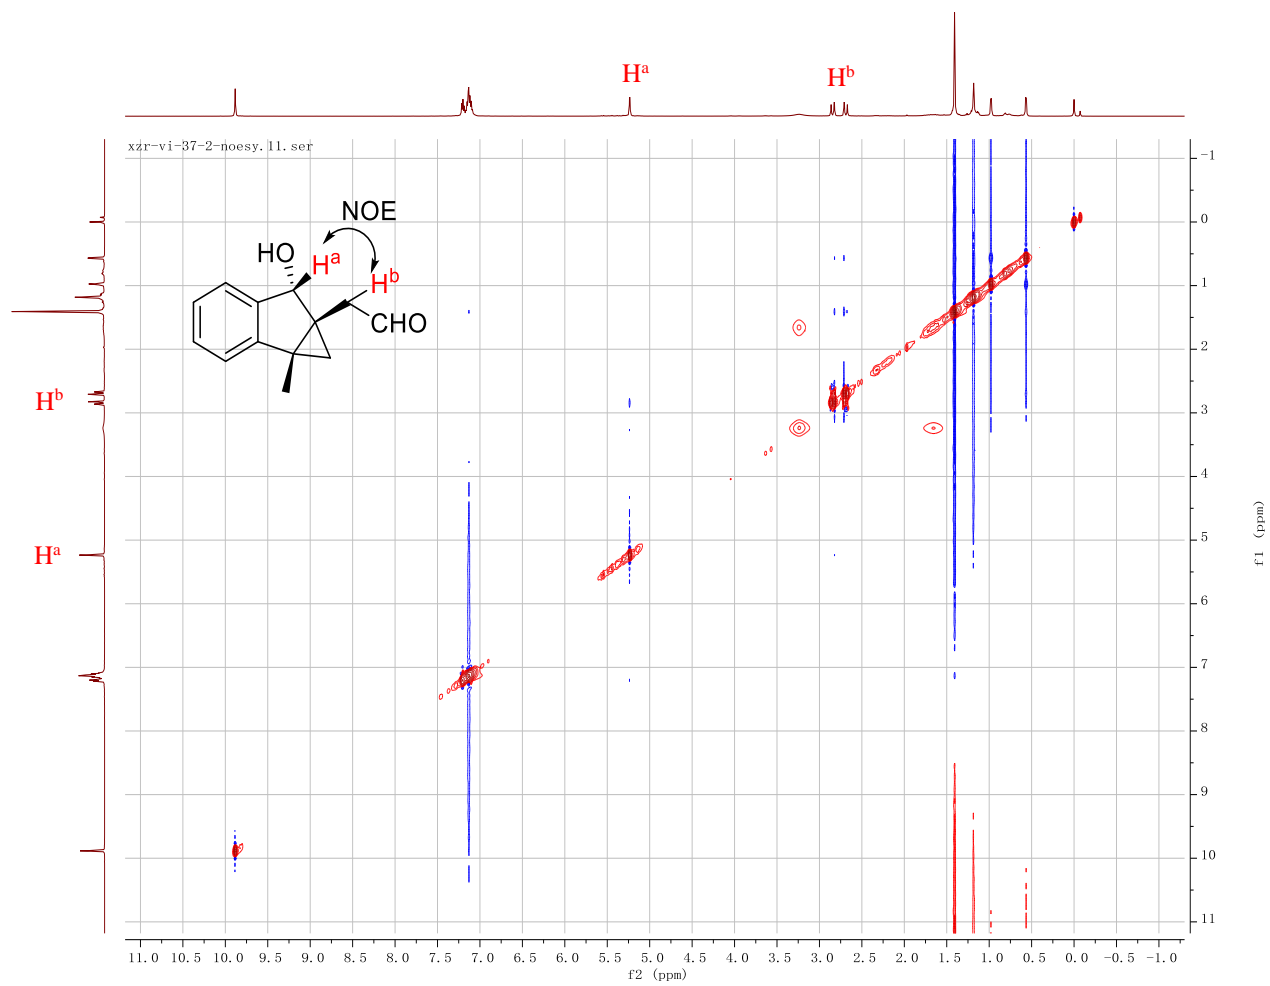

## 8. The X-ray diffraction analysis

### Crystal data and structure refinement for **2j** (CCDC 2220784).

Single crystal of **2j** was grown from slow evaporation of EA/PE solvent. A suitable crystal was selected and measured on a SuperNova, Dual, Cu at zero, AtlasS2 diffractometer. The crystal was kept at 179.99(10) K during data collection.

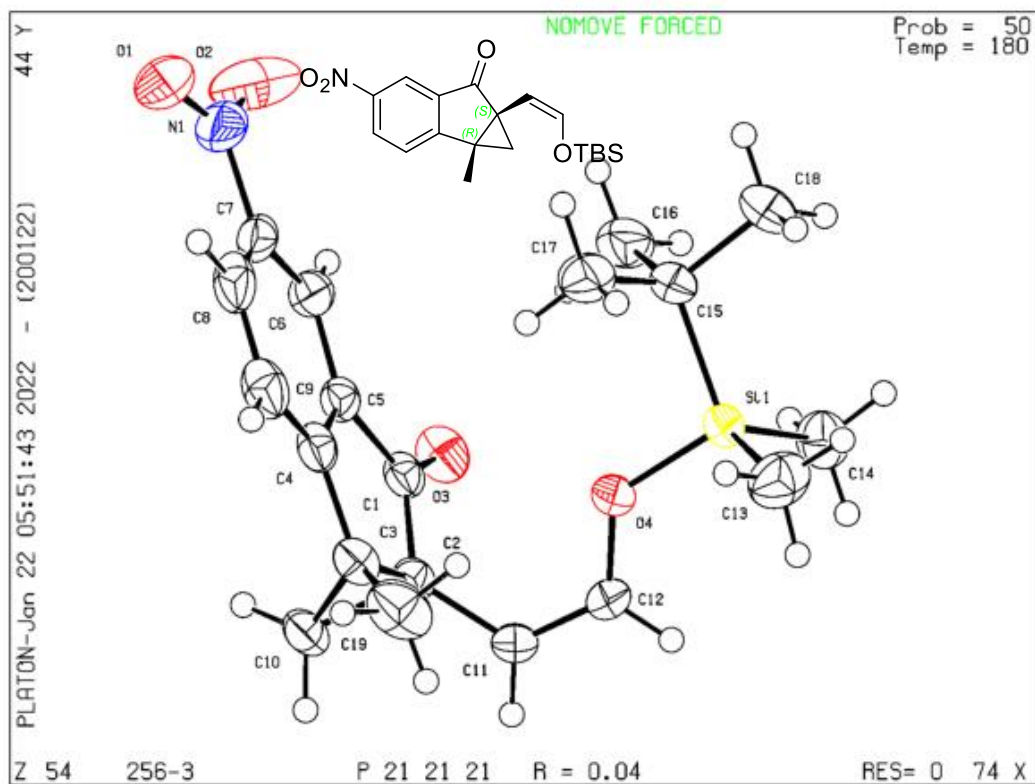

Ellipsoid plot of the crystal structure of **2j** (Prob = 50, Temp = 180 K)

|                                    |                                                    |
|------------------------------------|----------------------------------------------------|
| Identification code                | <b>256-3</b>                                       |
| Empirical formula                  | C <sub>19</sub> H <sub>25</sub> NO <sub>4</sub> Si |
| Formula weight                     | 359.49                                             |
| Temperature/K                      | 179.99(10)                                         |
| Crystal system                     | Orthorhombic                                       |
| Space group                        | P2 <sub>1</sub> 2 <sub>1</sub> 2 <sub>1</sub>      |
| a/Å                                | 8.1571(2)                                          |
| b/Å                                | 8.3394(2)                                          |
| c/Å                                | 29.2782(4)                                         |
| α/°                                | 90                                                 |
| β/°                                | 90                                                 |
| γ/°                                | 90                                                 |
| Volume/Å <sup>3</sup>              | 1991.66(7)                                         |
| Z                                  | 4                                                  |
| ρ <sub>calc</sub> /cm <sup>3</sup> | 1.199                                              |
| μ/mm <sup>-1</sup>                 | 1.222                                              |

|                                             |                                                               |
|---------------------------------------------|---------------------------------------------------------------|
| F(000)                                      | 768.0                                                         |
| Crystal size/mm <sup>3</sup>                | 0.12 × 0.1 × 0.08                                             |
| Radiation                                   | Cu Kα (λ = 1.54184)                                           |
| 2θ range for data collection/°              | 6.038 to 147.51                                               |
| Index ranges                                | -9 ≤ h ≤ 9, -10 ≤ k ≤ 9, -35 ≤ l ≤ 36                         |
| Reflections collected                       | 18375                                                         |
| Independent reflections                     | 3937 [R <sub>int</sub> = 0.0473, R <sub>sigma</sub> = 0.0254] |
| Data/restraints/parameters                  | 3937/0/233                                                    |
| Goodness-of-fit on F <sup>2</sup>           | 1.018                                                         |
| Final R indexes [I >= 2σ (I)]               | R <sub>1</sub> = 0.0355, wR <sub>2</sub> = 0.0989             |
| Final R indexes [all data]                  | R <sub>1</sub> = 0.0364, wR <sub>2</sub> = 0.0998             |
| Largest diff. peak/hole / e Å <sup>-3</sup> | 0.25/-0.17                                                    |
| Flack/Hoof parameter                        | 0.019(13)/0.004(10)                                           |

**Crystal data and structure refinement for complex A (CCDC 2283357)**

Single crystal of **complex A** was grown from slow evaporation of DCM/PE solvent. A suitable crystal was selected and measured on a SuperNova, Dual, Cu at zero, AtlasS2 diffractometer. The crystal was kept at 293(10) K during data collection.

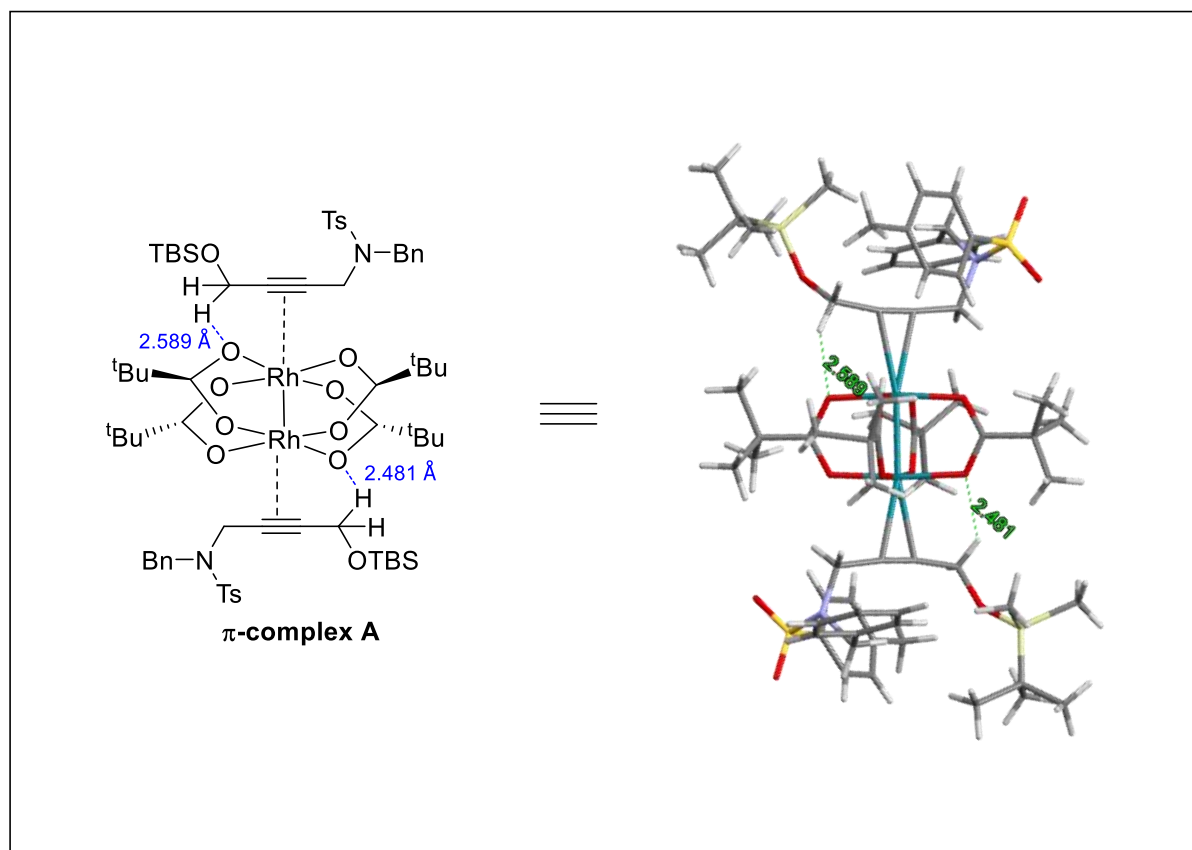

Ellipsoid plot of the crystal structure of **complex A** (Prob = 50, Temp = 293 K)

**Table 1** Crystal data and structure refinement for complex A.



|                                               |                                                                |
|-----------------------------------------------|----------------------------------------------------------------|
| Identification code                           | XZR-0626                                                       |
| Empirical formula                             | $C_{68}H_{102}N_2O_{14}Rh_2S_2Si_2$                            |
| Formula weight                                | 1497.63                                                        |
| Temperature/K                                 | 293.00(10)                                                     |
| Crystal system                                | monoclinic                                                     |
| Space group                                   | $P2_1/c$                                                       |
| $a/\text{\AA}$                                | 14.1225(7)                                                     |
| $b/\text{\AA}$                                | 20.8129(16)                                                    |
| $c/\text{\AA}$                                | 27.9242(16)                                                    |
| $\alpha/^\circ$                               | 90                                                             |
| $\beta/^\circ$                                | 103.361(6)                                                     |
| $\gamma/^\circ$                               | 90                                                             |
| Volume/ $\text{\AA}^3$                        | 7985.6(9)                                                      |
| Z                                             | 4                                                              |
| $\rho_{\text{calc}}/\text{cm}^3$              | 1.246                                                          |
| $\mu/\text{mm}^{-1}$                          | 0.551                                                          |
| F(000)                                        | 3144.0                                                         |
| Crystal size/ $\text{mm}^3$                   | $0.17 \times 0.15 \times 0.12$                                 |
| Radiation                                     | Mo $K\alpha$ ( $\lambda = 0.71073$ )                           |
| $2\Theta$ range for data collection/ $^\circ$ | 4.114 to 49.996                                                |
| Index ranges                                  | $-16 \leq h \leq 16, -21 \leq k \leq 24, -27 \leq l \leq 33$   |
| Reflections collected                         | 37141                                                          |
| Independent reflections                       | 14065 [ $R_{\text{int}} = 0.0540, R_{\text{sigma}} = 0.0804$ ] |
| Data/restraints/parameters                    | 14065/1087/967                                                 |
| Goodness-of-fit on $F^2$                      | 1.035                                                          |
| Final R indexes [ $I \geq 2\sigma(I)$ ]       | $R_1 = 0.0800, wR_2 = 0.1973$                                  |
| Final R indexes [all data]                    | $R_1 = 0.1335, wR_2 = 0.2435$                                  |
| Largest diff. peak/hole / $e \text{\AA}^{-3}$ | 0.88/-0.84                                                     |

## 9. References

1. F. Wu, S. Zhu, *Org. Lett.* **2019**, *21*, 1488-1492.
2. B. Bradshaw, P. Evans, J. Fletcher, A. T. L. Lee, P. G. Mwashimba, D. Oehlrich, E. J. Thomas, R. H. Davies, B. C. P. Allen, K. J. Broadley, A. Hamrouni, C. Escargueil, *Org. Biomol. Chem.* **2008**, *6*, 2138-2157.
3. F. Wang, D. Wang, Y. Zhou, L. Liang, R. Lu, P. Chen, Z. Lin, G. Liu, *Angew. Chem. Int. Ed.* **2018**, *57*, 7140-7145.
4. A. Pradal, G. Evano, *Chem. Commun.* **2014**, *50*, 11907-11910.
5. T. Hameury, J. Guillemont, L. Van Hijfte, V. Bellosta, J. Cossy, *Org. Lett.* **2009**, *11*, 2397-2400.
6. R. Chaudhuri, A. Das, H.-Y. Liao, R.-S. Liu, *Chem. Commun.* **2010**, *46*, 4601-4603.
7. B. J. Melancon, N. R. Perl, R. E. Taylor, *Org. Lett.* **2007**, *9*, 1425-1428.
8. T. Ramnial, S. A. Taylor, M. L. Bender, B. Gorodetsky, P. T. K. Lee, D. A. Dickie, B. M. McCollum, C. C. Pye, C. J. Walsby, J. A. C. Clyburne, *J. Org. Chem.* **2008**, *73*, 801-812.
9. A. Nagendiran, H. Sørensen, M. J. Johansson, C.-W. Tai, J.-E. Bäckvall, *Green Chem.* **2016**, *18*, 2632-2637.
10. H. Wang, R. Jia, M. Hong, H. Miao, B. Ni, T. Niu, *Green Chem.* **2021**, *23*, 6591-6597
11. Z. Yang, J. C. Lorenz, Y. Shi, *Tetrahedron Lett.* **1998**, *39*, 8621-8624.
12. M. O'Brien, I. R. Baxendale, S. V. Ley, *Org. Lett.* **2010**, *12*, 1596-1598
